# Supplementary material for: BN-Benzo[b]fluoranthenes: facile synthesis, characterization, and optoelectronic properties
Source: Royal Society of Chemistry journal article supplement (doi:10.1039/d4qo00219a), 2024-01-01
Supplement: d4qo00219a1.pdf [file d4qo00219a1.pdf]

## Supplementary Information for

### **BN-Benzo[*b*]fluoranthenes: facile synthesis, characterization, and optoelectronic properties**

Yuyi Wang,<sup>a</sup> Siqu Liu,<sup>a</sup> Peng Yang,<sup>a</sup> Tao Shi,<sup>a</sup> Jiawei Fan,<sup>a</sup> Guijiang Zhou,<sup>a\*</sup> Bochao Su<sup>a\*</sup>

<sup>a</sup>*School of Chemistry, Engineering Research Center of Energy Storage Materials and Devices, Ministry of Education, Xi'an Key Laboratory of Sustainable Energy Materials Chemistry, Xi'an Jiaotong University, Xi'an 710049, China*

Correspondence to: zhougj@mail.xjtu.edu.cn

bochao.su@xjtu.edu.cn

### **Contents**

1. Synthetic procedures
2. Crystal structural parameters
3. Photophysical properties
4. Device performance
5. Computational details
6. References
7. NMR Spectra Collection

## 1. Synthetic procedures

**General considerations:** All oxygen- and moisture-sensitive manipulations were carried out under dry nitrogen using standard Schlenk techniques or in a Vigor inert atmosphere dry-box containing an atmosphere of purified nitrogen. Solvents were dried by standard methods and freshly distilled prior to use. The NMR spectra were recorded with a JEOL-400 MHz spectrometer, referenced to residual solvent signals as internal standards ( $^1\text{H}$  and  $^{13}\text{C}\{^1\text{H}\}$ ) or with an external reference ( $\text{BF}_3\cdot\text{OEt}_2$  for  $^{11}\text{B}$ ). Abbreviations: s = singlet; d = doublet; t = triplet; m = multiplet; br = broad. The UV-Vis absorption spectra of the compounds were recorded on a Perkin-Elmer Lambda-950 Spectrophotometer. The photoluminescence (PL) spectra, related emission lifetimes, and the absolute fluorescence quantum yields of the compounds were studied with Edinburgh Instruments Ltd (FLSP980) fluorescence spectrophotometer. The mass spectra (MS) were characterized on an Agilent 6540 electrospray ionization quadrupole time-of-flight mass spectrometer or the WATERS I-Class VION IMS Qtof mass spectroscopy.

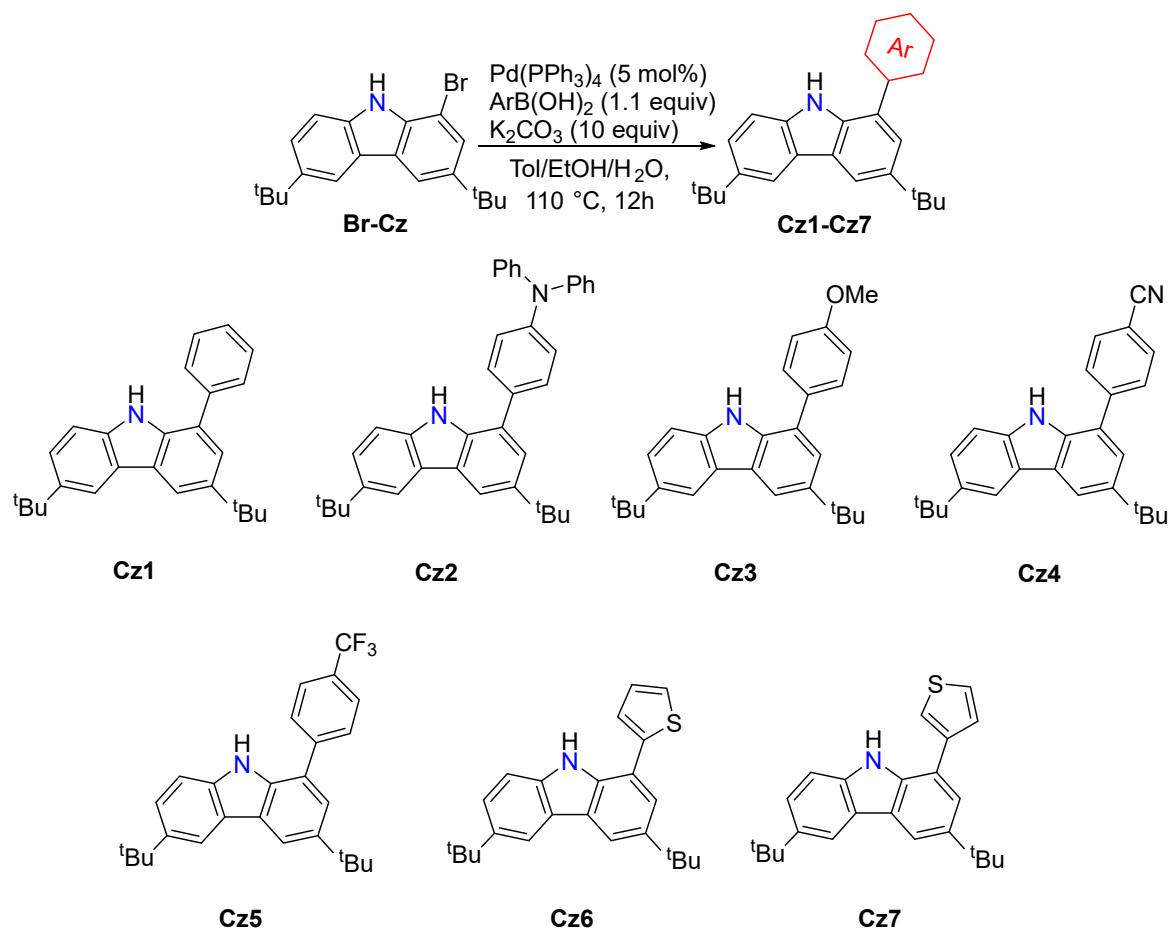

### Scheme S1 Synthesis of Cz1-Cz7.

**Typical procedures:** A sealed tube containing 1-bromo-3,6-di-tert-butyl-9H-carbazole (2.56 g, 7.2 mmol, 1.0 equiv), Pd(PPh<sub>3</sub>)<sub>4</sub> (0.42 g, 0.36 mmol, 0.05 equiv), arylboronic acid (7.9 mmol, 1.1 equiv) and K<sub>2</sub>CO<sub>3</sub> (9.95 g, 72.0 mmol, 10.0 equiv) was pumped and then refilled with nitrogen three times. A mixed solvent (Toluene/EtOH/H<sub>2</sub>O = 5/1/1, 140 mL) was added to the above mixture by syringe. The reaction mixture was heated to 110 °C and stirred for 12 hours. After cooling to room temperature, the solvent was extracted three times with dichloromethane, dried over anhydrous magnesium sulfate, and filtered. The solvent was removed under vacuum to produce the crude product. The crude product was purified by column chromatography on silica gel to give the

corresponding coupling compounds **Cz1-Cz7**.

**Cz1:**  $R_f = 0.75$  (PE:DCM = 2:1), m.p. 182-183 °C, white solid (2.05 g, yield = 80 %).

$^1\text{H}$  NMR (400 MHz,  $\text{CDCl}_3$ ):  $\delta$  8.24 (d,  $J = 8.4$  Hz, 2H, Ar), 8.18 (s, 1H, NH), 7.81 (d,  $J = 7.7$  Hz, 2H, Ar), 7.69 - 7.60 (m, 3H, Ar), 7.59 - 7.49 (m, 2H, Ar), 7.38 (d,  $J = 8.5$  Hz, 1H, Ar), 1.62 (s, 9H,  $\text{CH}_3$ ), 1.58 (s, 9H,  $\text{CH}_3$ ).  $^{13}\text{C}$  NMR (100 MHz,  $\text{CDCl}_3$ ):  $\delta$  142.88, 142.44, 139.82, 138.13, 135.97, 129.31, 128.54, 127.48, 124.38, 123.88, 123.82, 123.74, 123.62, 116.44, 115.62, 110.23, 34.93, 34.84, 32.24, 32.19.

**Cz2:**  $R_f = 0.60$  (PE:DCM = 2:1), m.p. 214-216 °C, white solid (2.18 g, yield = 58 %).

$^1\text{H}$  NMR (400 MHz,  $\text{CDCl}_3$ ):  $\delta$  8.16 (s, 1H, Ar), 8.11 (s, 1H, Ar), 8.06 (s, 1H, Ar), 7.58 (d,  $J = 8.5$  Hz, 2H, Ar), 7.50 - 7.44 (m, 2H, Ar), 7.37 - 7.28 (m, 5H, Ar), 7.22 (t,  $J = 8.6$  Hz, 5H, Ar), 7.07 (t,  $J = 7.3$  Hz, 2H, Ar), 1.50 (s, 9H,  $\text{CH}_3$ ), 1.47 (s, 9H,  $\text{CH}_3$ ).  $^{13}\text{C}$  NMR (100 MHz,  $\text{CDCl}_3$ ):  $\delta$  147.82, 147.27, 142.90, 142.43, 138.13, 135.97, 133.67, 129.50, 129.18, 124.66, 124.29, 124.04, 123.85, 123.77, 123.68, 123.53, 123.21, 116.44, 115.30, 110.22, 34.94, 34.86, 32.25, 32.19. HRMS (ESI)  $m/z$  calcd for  $(\text{C}_{38}\text{H}_{38}\text{N}_2)$   $[\text{M}+\text{H}]^+$ , 523.31087, found: 523.30941.

**Cz3:**  $R_f = 0.20$  (PE:DCM = 2:1), m.p. 185-186 °C, white solid (1.66 g, yield = 60 %).

$^1\text{H}$  NMR (400 MHz,  $\text{CDCl}_3$ ):  $\delta$  8.14-8.03 (m, 3H, Ar), 7.64 (d,  $J = 8.7$  Hz, 2H, Ar), 7.50-7.43 (m, 2H, Ar), 7.32 (d,  $J = 8.5$  Hz, 1H, Ar), 7.10 (d,  $J = 8.5$  Hz, 2H, Ar), 3.91 (s, 3H,  $\text{OCH}_3$ ), 1.50 (s, 9H,  $\text{CH}_3$ ), 1.47 (s, 9H,  $\text{CH}_3$ ).  $^{13}\text{C}$  NMR (100 MHz,  $\text{CDCl}_3$ ):  $\delta$  159.11, 142.87, 142.40, 138.16, 136.09, 132.17, 129.60, 124.12, 123.78, 123.74, 123.70, 123.56, 116.44, 115.17, 114.72, 110.21, 55.51, 34.92, 34.85, 32.25, 32.19. HRMS (ESI)  $m/z$  calcd for  $(\text{C}_{27}\text{H}_{31}\text{NO})$   $[\text{M}+\text{H}]^+$ , 386.24784, found: 386.24812.

**Cz4:**  $R_f = 0.30$  (PE:DCM = 1:1), m.p. 290-291 °C, white solid (1.37 g, yield = 50 %).

$^1\text{H}$  NMR (400 MHz,  $\text{CDCl}_3$ ):  $\delta$  8.14 (s, 1H, Ar), 8.11 (s, 1H, Ar), 8.06 (s, 1H, NH), 7.83 (s, 4H, Ar), 7.50 (d,  $J = 6.7$  Hz, 1H, Ar), 7.45 (s, 1H, Ar), 7.35 (d,  $J = 8.5$  Hz, 1H, Ar), 1.49 (s, 9H,  $\text{CH}_3$ ), 1.46 (s, 9H,  $\text{CH}_3$ ).  $^{13}\text{C}$  NMR (100 MHz,  $\text{CDCl}_3$ ):  $\delta$  144.72, 143.19, 142.94, 138.20, 135.59, 133.09, 129.15, 124.48, 124.28, 123.61, 123.38, 122.33, 119.07, 117.05, 116.49, 110.92, 110.41, 34.94, 34.87, 32.17, 32.13. HRMS (ESI)  $m/z$  calcd for ( $\text{C}_{27}\text{H}_{28}\text{N}_2$ )  $[\text{M}+\text{H}]^+$ , 381.23253, found: 381.23320.

**Cz5:**  $R_f = 0.40$  (PE:DCM = 6:1), m.p. 210-211 °C, white solid (1.46 g, yield = 48 %).

$^1\text{H}$  NMR (400 MHz,  $\text{CDCl}_3$ ):  $\delta$  8.13 (s), 8.11 (s), 8.05 (s, 1H, NH), 7.82 (s, 4H, Ar), 7.51-7.44 (m, 2H, Ar), 7.34 (d,  $J = 8.5$  Hz, 1H, Ar), 1.50 (s, 9H,  $\text{CH}_3$ ), 1.46 (s, 9H,  $\text{CH}_3$ ).  $^{13}\text{C}$  NMR (100 MHz,  $\text{CDCl}_3$ ): 143.53, 143.12, 142.82, 138.17, 135.79, 129.70 (q,  $J_{\text{C-F}} = 32.6$  Hz), 128.83, 126.24 (q,  $J_{\text{C-F}} = 3.7$  Hz), 124.37 (q,  $J_{\text{C-F}} = 271.9$  Hz), 124.26, 124.15, 123.70, 123.50, 122.89, 116.55, 116.52, 110.34, 34.95, 34.88, 32.20, 32.16. HRMS (ESI)  $m/z$  calcd for ( $\text{C}_{27}\text{H}_{28}\text{F}_3\text{N}$ )  $[\text{M}+\text{H}]^+$ , 424.22466, found: 424.22528.

**Cz6:**  $R_f = 0.55$  (PE:DCM = 2:1), m.p. 149-150 °C, white solid (1.38 g, yield = 52 %).

$^1\text{H}$  NMR (400 MHz,  $\text{CDCl}_3$ ):  $\delta$  8.35 (s, 1H, NH), 8.11 (s, 1H, Ar), 8.09 (s, 1H, Ar), 7.61 (s, 1H, Ar), 7.50 (d,  $J = 6.8$  Hz, 1H, Ar), 7.43 (t,  $J = 4.5$  Hz, 2H, Ar), 7.38 (d,  $J = 8.5$  Hz, 1H, Ar), 7.23 (dd,  $J = 5.1, 3.6$  Hz, 1H, Ar), 1.50 (s, 9H,  $\text{CH}_3$ ), 1.47 (s, 9H,  $\text{CH}_3$ ).  $^{13}\text{C}$  NMR (100 MHz,  $\text{CDCl}_3$ ):  $\delta$  142.83, 142.74, 141.91, 138.16, 135.62, 128.10, 124.95, 124.71, 124.27, 124.05, 123.56, 123.46, 117.24, 116.47, 116.25, 110.43, 34.89, 32.18. HRMS (ESI)  $m/z$  calcd for ( $\text{C}_{24}\text{H}_{27}\text{NS}$ )  $[\text{M}+\text{H}]^+$ , 362.19370, found: 362.19387.

**Cz7:**  $R_f = 0.55$  (PE:DCM = 2:1), m.p. 170-171 °C, white solid (1.35 g, yield = 52 %).

$^1\text{H}$  NMR (400 MHz,  $\text{CDCl}_3$ ):  $\delta$  8.13 (s, 1H, NH), 8.11 (s, 1H, Ar), 8.07 (s, 1H, Ar), 7.57-7.59 (m, 1H, Ar), 7.56-7.52 (m, 2H, Ar), 7.51-7.46 (m, 2H, Ar), 7.35 (d,  $J = 8.5$  Hz, 1H, Ar), 1.49 (s, 9H,  $\text{CH}_3$ ), 1.47 (s, 9H,  $\text{CH}_3$ ).  $^{13}\text{C}$  NMR (100 MHz,  $\text{CDCl}_3$ ):  $\delta$  142.79, 142.59, 140.41, 138.18, 136.09, 127.87, 126.79, 124.02, 123.89, 123.68, 123.23, 121.66, 119.36, 116.47, 115.66, 110.32, 34.90, 34.87, 32.23, 32.18. HRMS (ESI)  $m/z$  calcd for ( $\text{C}_{24}\text{H}_{27}\text{NS}$ )  $[\text{M}+\text{H}]^+$ , 362.19370, found: 362.19468.

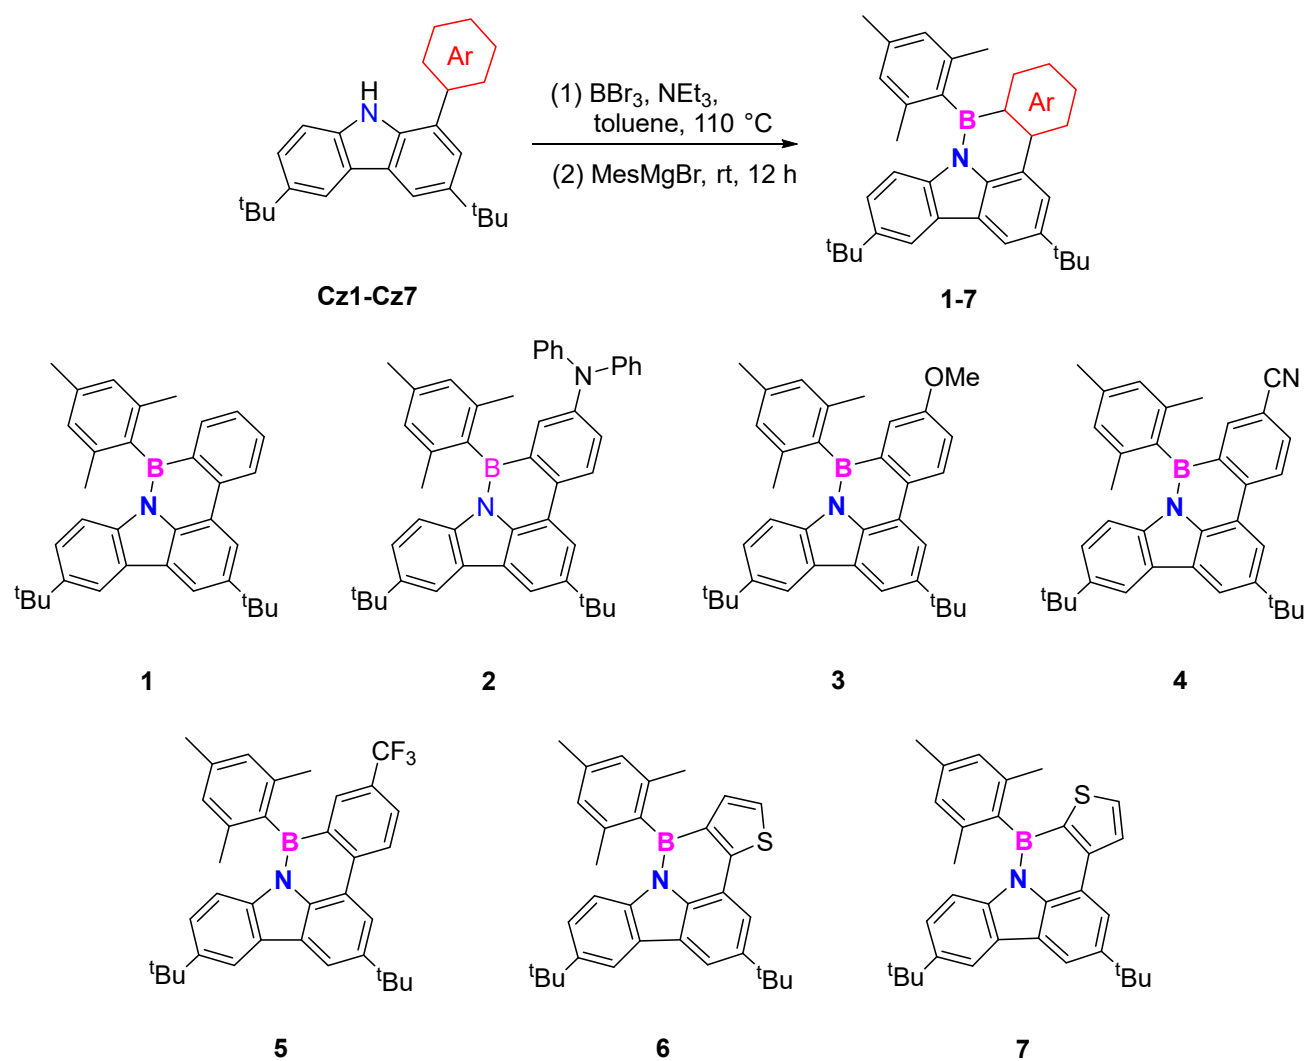

**Scheme S2** Synthesis of **1-7**.

**Typical procedures:** A mixture of 3,6-di-tert-butyl-1-aryl-9H-carbazole (0.5 mmol, 1.0 equiv), triethylamine (0.21 mL, 1.5 mmol, 3 equiv) in toluene (15 mL) was stirred at room temperature in 10 minutes. Then boron tribromide (1.0 M in heptane, 0.55 mL, 0.55 mmol, 1.1 equiv) was dropwise added to the reaction mixture. After stirring at room temperature for 10 minutes, the reaction mixture was heated up to 110 °C for 12 hours. After cooling to room temperature, mesitylmagnesium bromide (1.0 M in THF, 2.0 mL, 2.0 mmol, 4.0 equiv) was added under a nitrogen atmosphere and stirred for 12 h at room temperature. Then the mixture was quenched with water. The solvent was removed by vacuum. The mixture was extracted with dichloromethane and washed with water. The combined organic layer was dried over MgSO<sub>4</sub> and filtered. After the removal of the solvents, the residue was purified by column chromatography on silica gel to give the corresponding target product **1-7**.

**1:** R<sub>f</sub> = 0.80 (PE:DCM = 2:1), m.p. 215-216 °C, white solid (169.2 mg, yield = 70 %). <sup>1</sup>H NMR (400 MHz, CDCl<sub>3</sub>, 298K): δ 8.59 (d, *J* = 8.0 Hz, 1H, Ar), 8.52 (s, 1H, Ar), 8.23 (s, 1H, Ar), 8.10 (s, 1H, Ar), 7.86 (d, *J* = 7.5 Hz, 1H, Ar), 7.80 (t, *J* = 7.5 Hz, 1H, Ar), 7.44 (t, *J* = 7.4 Hz, 1H, Ar), 7.28 (d, *J* = 1.9 Hz, 1H, Ar), 7.01 (s, 2H, Ar), 6.85 (d, *J* = 8.6 Hz, 1H, Ar), 2.46 (s, 3H, CH<sub>3</sub>), 2.04 (s, 6H, CH<sub>3</sub>), 1.61 (s, 9H, CH<sub>3</sub>), 1.42 (s, 9H, CH<sub>3</sub>). <sup>13</sup>C NMR (100 MHz, CDCl<sub>3</sub>, 298K): δ 146.90, 146.37, 142.31, 139.84, 138.14, 138.05, 137.64, 136.34, 131.78, 128.85, 127.61, 127.16, 126.79, 124.97, 122.10, 121.63, 117.97, 116.86, 116.76, 114.94, 35.52, 34.98, 32.39, 31.94, 22.60, 21.64 (B-aryl carbons were not observed). <sup>11</sup>B NMR (128 MHz, CDCl<sub>3</sub>, 298K): δ 43.63. HRMS (ESI) *m/z* calcd for (C<sub>35</sub>H<sub>38</sub>BN) [M+H]<sup>+</sup>, 484.31701, found: 484.31704.

**2:**  $R_f = 0.50$  (PE:DCM = 8:1), m.p. 178-179 °C, pale yellow solid (227.7 mg, yield = 70 %).  $^1\text{H}$  NMR (400 MHz,  $\text{CDCl}_3$ , 298K):  $\delta$  8.46 (d,  $J = 8.6$  Hz, 1H, Ar), 8.41 (s, 1H, Ar), 8.18 (s, 1H, Ar), 8.09 (s, 1H, Ar), 7.57 (s, 1H, Ar), 7.52 (d,  $J = 8.6$  Hz, 1H, Ar), 7.21 (t,  $J = 8.0$  Hz, 5H, Ar), 7.09 (d,  $J = 8.1$  Hz, 4H, Ar), 6.98 (t,  $J = 7.2$  Hz, 2H, Ar), 6.86 (s, 2H, Ar), 6.79 (d,  $J = 8.6$  Hz, 1H, Ar), 2.35 (s, 3H,  $\text{CH}_3$ ), 1.98 (s, 3H,  $\text{CH}_3$ ), 1.59 (s, 3H,  $\text{CH}_3$ ), 1.42 (s, 3H,  $\text{CH}_3$ ).  $^{13}\text{C}$  NMR (100 MHz,  $\text{CDCl}_3$ , 298K):  $\delta$  147.74, 146.88, 146.46, 146.37, 142.27, 139.53, 137.85, 136.08, 133.20, 132.67, 129.24, 128.97, 128.62, 127.52, 127.02, 124.84, 123.83, 123.31, 122.71, 121.53, 117.60, 116.81, 116.01, 115.01, 35.48, 34.97, 32.37, 31.93, 22.51, 21.51 (B-aryl carbons were not observed).  $^{11}\text{B}$  NMR (128 MHz,  $\text{CDCl}_3$ , 298K):  $\delta$  42.68. HRMS (ESI)  $m/z$  calcd for  $(\text{C}_{47}\text{H}_{47}\text{BN}_2) [\text{M}+\text{H}]^+$ , 651.39051, found: 651.38822.

**3:**  $R_f = 0.45$  (PE:DCM = 8:1), m.p. 183-184 °C, white solid (130.9 mg, yield = 51 %)  $^1\text{H}$  NMR (400 MHz,  $\text{CDCl}_3$ , 298K):  $\delta$  8.54 (d,  $J = 8.8$  Hz, 1H, Ar), 8.44 (s, 1H, Ar), 8.18 (s, 1H, Ar), 8.10 (s, 1H, Ar), 7.39 (d,  $J = 8.7$  Hz, 1H, Ar), 7.33 (s, 1H, Ar), 7.28 (s, 1H, Ar), 7.00 (s, 2H, Ar), 6.84 (d,  $J = 8.6$  Hz, 1H, Ar), 3.82 (s), 2.45 (s, 3H,  $\text{CH}_3$ ), 2.05 (s, 6H,  $\text{CH}_3$ ), 1.61 (s, 9H,  $\text{CH}_3$ ), 1.43 (s, 9H,  $\text{CH}_3$ ).  $^{13}\text{C}$  NMR (100 MHz,  $\text{CDCl}_3$ , 298K):  $\delta$  158.53, 146.88, 146.43, 142.30, 139.71, 137.97, 135.73, 131.60, 129.02, 127.64, 127.03, 124.85, 123.73, 121.64, 120.15, 119.15, 117.42, 116.85, 115.71, 114.95, 55.54, 35.49, 34.97, 32.39, 31.93, 22.53, 21.62 (B-aryl carbons were not observed).  $^{11}\text{B}$  NMR (128 MHz,  $\text{CDCl}_3$ , 298K):  $\delta$  42.68. HRMS (ESI)  $m/z$  calcd for  $(\text{C}_{36}\text{H}_{40}\text{BNO}) [\text{M}+\text{H}]^+$ , 514.32757, found: 514.32420.



**4:**  $R_f = 0.55$  (PE : DCM = 2:1), m.p. 288-289 °C, pale solid (83.9 mg, yield = 33 %).  $^1\text{H}$  NMR (400 MHz,  $\text{CDCl}_3$ , 298K):  $\delta$  8.66 (d,  $J = 8.4$  Hz, 1H, Ar), 8.50 (s, 1H, Ar), 8.32 (s, 1H, Ar), 8.15 (s, 1H, Ar), 8.11 (s, 1H, Ar), 8.01 (d,  $J = 8.3$  Hz, 1H, Ar), 7.31 (d,  $J = 8.6$  Hz, 1H, Ar), 7.04 (s, 2H, Ar), 6.89 (d,  $J = 8.6$  Hz, 1H, Ar), 2.47 (s, 3H,  $\text{CH}_3$ ), 2.02 (s, 6H,  $\text{CH}_3$ ), 1.61 (s, 9H,  $\text{CH}_3$ ), 1.43 (s, 9H,  $\text{CH}_3$ ).  $^{13}\text{C}$  NMR (100 MHz,  $\text{CDCl}_3$ , 298K):  $\delta$  147.68, 147.08, 142.06, 142.02, 141.69, 139.66, 138.75, 136.90, 133.92, 128.66, 127.95, 127.67, 125.48, 122.98, 120.20, 119.64, 118.77, 118.57, 117.05, 115.15, 110.02, 35.57, 35.04, 32.29, 31.88, 22.60, 21.61 (B-aryl carbons were not observed).  $^{11}\text{B}$  NMR (128 MHz,  $\text{CDCl}_3$ , 298K):  $\delta$  42.68. HRMS (ESI)  $m/z$  calcd for  $(\text{C}_{36}\text{H}_{37}\text{BN}_2) [\text{M}+\text{H}]^+$ , 509.31226, found: 509.30724.

**5:**  $R_f = 0.70$  (PE), m.p. 110-112 °C, white solid (124.1 mg, yield = 45 %).  $^1\text{H}$  NMR (400 MHz,  $\text{CDCl}_3$ , 298K):  $\delta$  8.69 (d,  $J = 8.4$  Hz, 1H, Ar), 8.53 (s, 1H, Ar), 8.30 (s, 1H, Ar), 8.11 (s, 2H, Ar), 8.01 (d,  $J = 8.4$  Hz, 1H, Ar), 7.30 (d,  $J = 6.7$  Hz, 1H, Ar), 7.03 (s, 2H, Ar), 6.83 (d,  $J = 8.7$  Hz, 1H, Ar), 2.47 (s, 3H,  $\text{CH}_3$ ), 2.03 (s, 6H,  $\text{CH}_3$ ), 1.62 (s, 9H,  $\text{CH}_3$ ), 1.43 (s, 9H,  $\text{CH}_3$ ).  $^{13}\text{C}$  NMR (100 MHz,  $\text{CDCl}_3$ , 298K):  $\delta$  147.43, 146.85, 142.19, 141.12, 139.72, 138.48, 136.76, 134.27 (q,  $J_{\text{C-F}} = 3.4$  Hz), 128.77, 128.47 (q,  $J_{\text{C-F}} = 32.1$  Hz), 128.04 (q,  $J_{\text{C-F}} = 3.3$  Hz), 127.90, 127.52, 125.32, 124.64 (q,  $J_{\text{C-F}} = 271.9$  Hz), 122.70, 120.53, 118.42, 118.08, 116.98, 115.16, 35.57, 35.02, 32.34, 31.90, 22.60, 21.63 (B-aryl carbons were not observed).  $^{11}\text{B}$  NMR (128 MHz,  $\text{CDCl}_3$ , 298K):  $\delta$  41.48. HRMS (ESI)  $m/z$  calcd for  $(\text{C}_{36}\text{H}_{37}\text{BF}_3\text{N}) [\text{M}+\text{H}]^+$ , 552.30439, found: 552.30601.

**6:**  $R_f = 0.70$  (PE:DCM = 2:1), m.p. 213-214 °C, pale solid (159.1 mg, yield = 65 %).  $^1\text{H}$  NMR (400 MHz,  $\text{CDCl}_3$ , 298K):  $\delta$  8.21 (s, 1H, Ar), 8.10 (s, 1H, Ar), 8.08 (s, 1H, Ar),

7.39 (d,  $J = 5.0$  Hz, 1H, Ar), 7.32 (d,  $J = 5.0$  Hz, 1H, Ar), 7.28 (d,  $J = 2.0$  Hz, 1H, Ar), 6.99 (s, 2H, Ar), 6.89 (d,  $J = 8.6$  Hz, 1H, Ar), 2.44 (s, 3H, CH<sub>3</sub>), 2.08 (s, 6H, CH<sub>3</sub>), 1.59 (s, 9H, CH<sub>3</sub>), 1.42 (s, 9H, CH<sub>3</sub>). <sup>13</sup>C NMR (100 MHz, CDCl<sub>3</sub>, 298K):  $\delta$  150.06, 146.91, 146.73, 142.80, 139.67, 138.00, 135.96, 132.90, 128.80, 127.59, 127.14, 125.10, 124.28, 119.43, 118.77, 117.07, 116.91, 114.91, 35.43, 34.97, 32.32, 31.92, 22.60, 21.60 (B-aryl carbons were not observed). <sup>11</sup>B NMR (128 MHz, CDCl<sub>3</sub>, 298K):  $\delta$  40.37. HRMS (ESI)  $m/z$  calcd for (C<sub>33</sub>H<sub>36</sub>BNS) [M+H]<sup>+</sup>, 490.27343, found: 490.27194.

**7:**  $R_f = 0.70$  (PE:DCM = 2:1), m.p. 222-223 °C, pale solid (159.1 mg, yield = 65 %). <sup>1</sup>H NMR (400 MHz, CDCl<sub>3</sub>, 298K):  $\delta$  8.25 (d,  $J = 6.3$  Hz, 2H, Ar), 8.14-8.08 (m, 2H, Ar), 7.96 (d,  $J = 4.8$  Hz, 1H, Ar), 7.28 (d,  $J = 7.0$  Hz, 1H, Ar), 7.01 (s, 2H, Ar), 6.90 (d,  $J = 8.6$  Hz, 1H, Ar), 2.45 (s, 3H, CH<sub>3</sub>), 2.12 (s, 6H, CH<sub>3</sub>), 1.60 (s, 9H, CH<sub>3</sub>), 1.42 (s, 9H, CH<sub>3</sub>). <sup>13</sup>C NMR (100 MHz, CDCl<sub>3</sub>, 298K):  $\delta$  146.86, 146.45, 145.97, 142.67, 139.81, 138.35, 136.49, 135.67, 129.03, 127.70, 126.91, 124.99, 123.25, 119.60, 119.07, 117.05, 116.43, 114.85, 35.45, 34.98, 32.37, 31.93, 22.54, 21.66 (B-aryl carbons were not observed). <sup>11</sup>B NMR (128 MHz, CDCl<sub>3</sub>, 298K):  $\delta$  38.74. HRMS (ESI)  $m/z$  calcd for (C<sub>33</sub>H<sub>36</sub>BNS) [M+H]<sup>+</sup>, 490.27343, found: 490.27127.

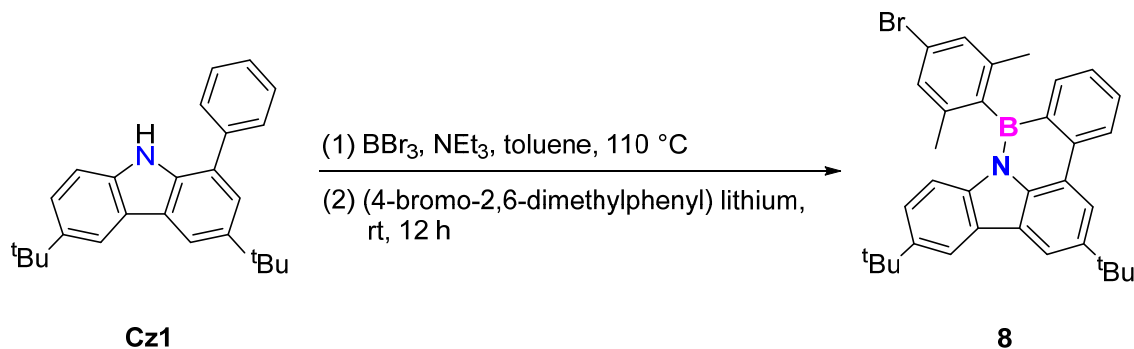

#### Scheme S4 Synthesis of **8**.

A mixture of 3,6-di-tert-butyl-1-phenyl-9H-carbazole (177.8 mg, 0.50 mmol, 1.0

equiv), triethylamine (0.21 mL, 1.50 mmol, 3 equiv) in toluene (10 mL) was stirred at room temperature in 10 minutes. Then boron tribromide (1.0 M in heptane, 0.55 mL, 0.55 mmol, 1.1 equiv) was dropwise added to the reaction mixture. After stirring at room temperature for 10 minutes, the reaction mixture was heated up to 110 °C for 12 hours. After cooling to room temperature, (4-bromo-2,6-dimethylphenyl)lithium which was prepared from 5-bromo-2-iodo-1,3-dimethylbenzene and n-BuLi (in THF, 2.0 mmol, 4.0 equiv) was added under a nitrogen atmosphere and stirred for 12 h at room temperature. Then the mixture was quenched with water. The solvent was removed by vacuum. The mixture was extracted with dichloromethane and washed with water. The combined organic layer was dried over MgSO<sub>4</sub> and filtered. After the removal of the solvents, the residue was purified by column chromatography on silica gel to give the target product **8**.

**8**: R<sub>f</sub> = 0.30 (PE), m.p. 198-199 °C, white solid (208.4 mg, yield = 76 %). <sup>1</sup>H NMR (400 MHz, CDCl<sub>3</sub>, 298K): δ 8.60 (d, *J* = 7.9 Hz, 1H, Ar), 8.53 (s, 1H, Ar), 8.24 (s, 1H, Ar), 8.11 (s, 1H, Ar), 7.88-7.72 (m, 2H, Ar), 7.46 (t, *J* = 7.4 Hz, 1H, Ar), 7.36 (s, 2H, Ar), 7.30 (d, *J* = 8.6 Hz, 1H, Ar), 6.85 (d, *J* = 8.6 Hz, 1H, Ar), 2.05 (s, 6H, CH<sub>3</sub>), 1.61 (s, 9H, CH<sub>3</sub>), 1.43 (s, 9H, CH<sub>3</sub>). <sup>13</sup>C NMR (100 MHz, CDCl<sub>3</sub>, 298K): δ 147.25, 146.66, 142.13, 142.01, 138.23, 137.25, 136.17, 132.04, 129.64, 128.96, 127.22, 126.93, 125.10, 122.73, 122.25, 121.62, 118.08, 117.06, 116.95, 114.69, 35.53, 34.99, 32.37, 31.91, 22.42 (B-aryl carbons were not observed). <sup>11</sup>B NMR (128 MHz, CDCl<sub>3</sub>, 298K): δ 42.21. HRMS (ESI) *m/z* calcd for (C<sub>34</sub>H<sub>35</sub>BBrN) [M+Na]<sup>+</sup>, 570.19381, found: 570.19498.

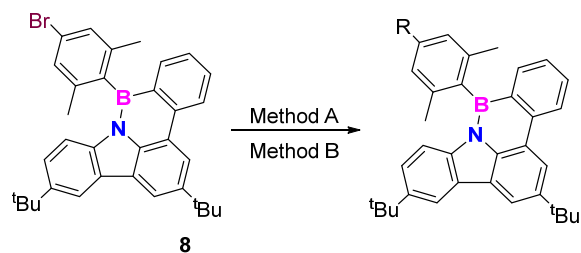

Method A: For **9-12**: ArB(OH)<sub>2</sub> (1.1 equiv), Pd(PPh<sub>3</sub>)<sub>4</sub> (5 mol%), K<sub>2</sub>CO<sub>3</sub> (10 equiv), toluene/EtOH, 110 °C, 12h  
 Method B: For **13**: Pd(OAc)<sub>2</sub> (10 mol%), P(<sup>t</sup>Bu)<sub>3</sub> (20 mol%), NaO<sup>t</sup>Bu (2 equiv), toluene, 110 °C, 12h

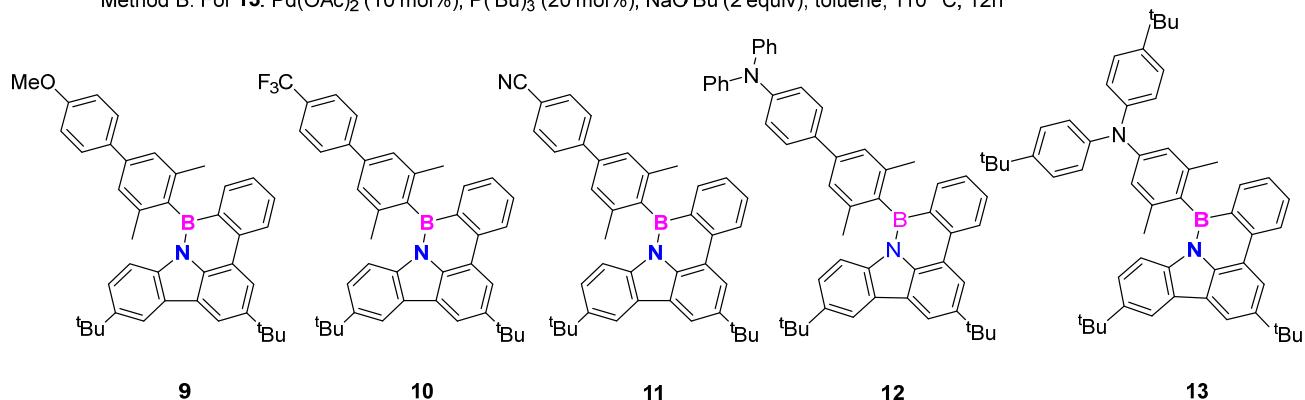

### Scheme S5 Synthesis of **9-13**.

**Typical procedures:** A sealed tube containing **8** (106.0 mg, 0.19 mmol, 1.0 equiv), Pd(PPh<sub>3</sub>)<sub>4</sub> (11.17 mg, 0.0097 mmol, 0.05 equiv), arylboronic acid (0.21 mmol, 1.1 equiv) and K<sub>2</sub>CO<sub>3</sub> (262.60 mg, 1.9 mmol, 10.0 equiv) was pumped and then refilled with nitrogen three times. A mixed solvent (Toluene/EtOH/H<sub>2</sub>O = 5/1/1, 12 mL) was added to the above mixture by syringe. The reaction mixture was heated to 110°C and stirred for 12 hours. After cooling to room temperature, the solvent was extracted three times with dichloromethane, dried over anhydrous magnesium sulfate, and filtered. The solvent was removed under vacuum to produce the crude product. The crude product was purified by column chromatography on silica gel to give the corresponding coupling compounds **9-12**.

A sealed tube containing **8** (111.0 mg, 0.20 mmol, 1.0 equiv), Pd(OAc)<sub>2</sub> (4.50 mg, 0.02 mmol, 0.10 equiv), bis(4-(tert-butyl)phenyl)amine (61.90 mg, 0.22 mmol, 1.1 equiv) and t-BuONa (38.44 mg, 0.40 mmol, 2.0 equiv) was pumped and then refilled

with nitrogen three times. Then (t-Bu)<sub>3</sub>P (0.1 mL, 0.04 mmol, 0.2 equiv) and dry toluene (15 mL) were added in sequence by syringe. The reaction mixture was heated to 110 °C and stirred for 12 hours. After cooling to room temperature, the solvent was extracted three times with dichloromethane, dried over anhydrous magnesium sulfate, and filtered. The solvent was removed under vacuum to produce the crude product. The crude product was purified by column chromatography on silica gel to give the target compound **13**.

**9**: R<sub>f</sub> = 0.35 (PE:DCM = 4:1), m.p. 257-258 °C, white solid (71.1 mg, yield = 65 %). <sup>1</sup>H NMR (400 MHz, CDCl<sub>3</sub>, 298K): δ 8.62 (d, *J* = 8.0 Hz, 1H, Ar), 8.55 (s, 1H, Ar), 8.25 (s, 1H, Ar), 8.12 (s, 1H, Ar), 7.92 (d, *J* = 7.4 Hz, 1H, Ar), 7.82 (t, *J* = 7.6 Hz, 1H, Ar), 7.73 (d, *J* = 8.6 Hz, 2H, Ar), 7.47 (t, *J* = 7.3 Hz, 1H, Ar), 7.41 (s, 2H, Ar), 7.28 (d, *J* = 8.7 Hz, 1H, Ar), 7.05 (d, *J* = 8.7 Hz, 2H, Ar), 6.93 (d, *J* = 8.6 Hz, 1H, Ar), 3.90 (s, 3H, CH<sub>3</sub>), 2.14 (s, 6H, CH<sub>3</sub>), 1.62 (s, 9H, CH<sub>3</sub>), 1.42 (s, 9H, CH<sub>3</sub>). <sup>13</sup>C NMR (100 MHz, CDCl<sub>3</sub>, 298K): δ 159.22, 147.03, 146.48, 142.27, 140.73, 140.40, 138.19, 137.64, 136.32, 134.10, 131.86, 128.90, 128.22, 127.20, 126.85, 125.04, 122.15, 121.66, 118.01, 116.91, 116.81, 114.95, 114.32, 55.53, 35.53, 34.99, 32.38, 31.92, 22.84 (B-aryl carbons were not observed). <sup>11</sup>B NMR (128 MHz, CDCl<sub>3</sub>, 298K): δ 38.73. HRMS (ESI) *m/z* calcd for (C<sub>41</sub>H<sub>42</sub>BNO) [M+H]<sup>+</sup>, 576.34322, found: 576.33999.

**10**: R<sub>f</sub> = 0.65 (PE:DCM = 8:1), m.p. 274-275 °C, white solid (58.3 mg, yield = 50 %). <sup>1</sup>H NMR (400 MHz, CDCl<sub>3</sub>, 298K): δ 8.65 (d, *J* = 8.1 Hz, 1H, Ar), 8.58 (s, 1H, Ar), 8.29 (s, 1H, Ar), 8.15 (s, 1H, Ar), 7.91 (d, *J* = 8.2 Hz, 3H, Ar), 7.85 (t, *J* = 7.6 Hz, 1H, Ar), 7.78 (d, *J* = 8.2 Hz, 2H, Ar), 7.55-7.44 (m, 3H, Ar), 7.30 (d, *J* = 8.6 Hz, 1H, Ar),

6.93 (d,  $J = 8.6$  Hz, 1H, Ar), 2.19 (s, 6H, CH<sub>3</sub>), 1.65 (s, 9H, CH<sub>3</sub>), 1.45 (s, 9H, CH<sub>3</sub>). <sup>13</sup>C NMR (100 MHz, CDCl<sub>3</sub>, 298K):  $\delta$  147.19, 146.64, 145.15, 142.17, 140.80, 139.74, 138.26, 137.45, 136.28, 131.99, 129.27 (q,  $J_{C-F} = 32.1$  Hz), 128.99, 127.50, 127.23, 126.91, 125.82 (q,  $J_{C-F} = 3.5$  Hz), 125.59, 125.02, 124.59 (q,  $J_{C-F} = 271.6$  Hz), 122.25, 121.67, 118.09, 117.04, 116.91, 114.77, 35.55, 35.01, 32.38, 31.91, 22.82 (B-aryl carbons were not observed). <sup>11</sup>B NMR (128 MHz, CDCl<sub>3</sub>, 298K):  $\delta$  44.66. HRMS (ESI)  $m/z$  calcd for (C<sub>41</sub>H<sub>39</sub>BF<sub>3</sub>N) [M+H]<sup>+</sup>, 614.32004, found: 614.31706.

**11:**  $R_f = 0.35$  (PE:DCM = 2:1), m.p. 319-320 °C, white solid (56.4 mg, yield = 52 %). <sup>1</sup>H NMR (400 MHz, CDCl<sub>3</sub>, 298K):  $\delta$  8.65 (d,  $J = 8.0$  Hz, 1H, Ar), 8.58 (s, 1H, Ar), 8.29 (s, 1H, Ar), 8.16 (s, 1H, Ar), 7.92-7.77 (m, 6H, Ar), 7.52-7.42 (m, 3H, Ar), 7.29 (d,  $J = 8.6$  Hz, 1H, Ar), 6.91 (d,  $J = 8.6$  Hz, 1H, Ar), 2.19 (s, 6H, CH<sub>3</sub>), 1.64 (s, 9H, CH<sub>3</sub>), 1.44 (s, 9H, CH<sub>3</sub>). <sup>13</sup>C NMR (100 MHz, CDCl<sub>3</sub>, 298K):  $\delta$  147.22, 146.68, 146.11, 142.10, 140.97, 139.14, 138.26, 137.34, 136.22, 132.72, 132.02, 128.99, 127.79, 127.20, 126.90, 125.51, 124.98, 122.27, 121.64, 119.31, 118.11, 117.08, 116.94, 114.66, 110.75, 35.54, 35.00, 32.36, 31.90, 22.80 (B-aryl carbons were not observed). <sup>11</sup>B NMR (128 MHz, CDCl<sub>3</sub>, 298K):  $\delta$  41.73. HRMS (ESI)  $m/z$  calcd for (C<sub>41</sub>H<sub>39</sub>BN<sub>2</sub>) [M+H]<sup>+</sup>, 571.32791, found: 571.32599.

**12:**  $R_f = 0.50$  (PE:DCM = 8:1), m.p. 284-285 °C, white solid (94.8 mg, yield = 70 %). <sup>1</sup>H NMR (400 MHz, CDCl<sub>3</sub>, 298K):  $\delta$  8.61 (d,  $J = 8.0$  Hz, 1H, Ar), 8.54 (s, 1H, Ar), 8.25 (s, 1H, Ar), 8.11 (s, 1H, Ar), 7.91 (d,  $J = 7.5$  Hz, 1H, Ar), 7.82 (t,  $J = 7.0$  Hz, 1H, Ar), 7.68 (d,  $J = 8.5$  Hz, 2H, Ar), 7.47 (t,  $J = 7.3$  Hz, 1H, Ar), 7.43 (s, 2H, Ar), 7.34-7.27 (m, 5H, Ar), 7.24-7.15 (m, 6H, Ar), 7.05 (t,  $J = 7.3$  Hz, 2H, Ar), 6.91 (d,  $J = 8.6$

Hz, 1H, Ar), 2.14 (s, 6H, CH<sub>3</sub>), 1.62 (s, 9H, CH<sub>3</sub>), 1.42 (s, 9H, CH<sub>3</sub>). <sup>13</sup>C NMR (100 MHz, CDCl<sub>3</sub>, 298K): δ 147.93, 147.20, 147.02, 146.48, 142.25, 140.57, 140.44, 138.19, 137.61, 136.31, 135.69, 131.88, 129.41, 128.90, 127.90, 127.20, 126.86, 125.01, 124.43, 124.41, 122.93, 122.16, 121.66, 118.02, 116.92, 116.82, 114.93, 35.52, 34.98, 32.38, 31.92, 22.84 (B-aryl carbons were not observed). <sup>11</sup>B NMR (128 MHz, CDCl<sub>3</sub>, 298K): δ 40.12. HRMS (ESI) m/z calcd for (C<sub>52</sub>H<sub>49</sub>BN<sub>2</sub>) [M+H]<sup>+</sup>, 713.40616, found: 713.40229.

**13:** R<sub>f</sub> = 0.65 (PE:DCM = 4:1), m.p. 168-169°C, white solid (92.9 mg, yield = 62 %). <sup>1</sup>H NMR (400 MHz, CDCl<sub>3</sub>, 298K): δ 8.60 (d, *J* = 8.1 Hz, 1H, Ar), 8.53 (s, 1H, Ar), 8.25 (s, 1H, Ar), 8.13 (s, 1H, Ar), 7.99 (d, *J* = 6.5 Hz, 1H, Ar), 7.82 (t, *J* = 7.6 Hz, 1H, Ar), 7.51 (t, *J* = 7.3 Hz, 1H, Ar), 7.39-7.31 (m, 5H, Ar), 7.17 (d, *J* = 8.7 Hz, 4H, Ar), 7.02 (d, *J* = 8.6 Hz, 1H, Ar), 6.93 (s, 2H, Ar), 1.98 (s, 6H, CH<sub>3</sub>), 1.61 (s, 9H, CH<sub>3</sub>), 1.47 (s, 9H, CH<sub>3</sub>), 1.36 (s, 18H, CH<sub>3</sub>). <sup>13</sup>C NMR (100 MHz, CDCl<sub>3</sub>, 298K): δ 148.33, 146.94, 146.39, 145.56, 145.27, 142.34, 140.91, 138.17, 137.79, 136.39, 131.80, 128.94, 127.15, 126.81, 126.13, 124.84, 123.94, 122.11, 121.95, 121.66, 117.99, 116.97, 116.75, 115.08, 35.53, 35.02, 34.45, 32.40, 31.99, 31.66, 22.77 (B-aryl carbons were not observed). <sup>11</sup>B NMR (128 MHz, CDCl<sub>3</sub>, 298K): δ 42.62. HRMS (ESI) m/z calcd for (C<sub>54</sub>H<sub>61</sub>BN<sub>2</sub>) [M+H]<sup>+</sup>, 749.50006, found: 749.49994.

## 2. Crystal structural parameters

**Single-Crystal X-ray Structure Determinations:** Crystals were each mounted on a glass capillary in perfluorinated oil and measured in a cold N<sub>2</sub> flow. The data of all compounds were collected on a Bruker D8-VENTURE diffractometer. The structures were solved by direct methods and refined on  $F^2$  with the SHELX-97<sup>S1</sup> and X-Seed software packages.<sup>S2</sup> The positions of the H atoms were calculated and considered isotropically according to a riding model. CCDC: 2323362-2323367 contains the supplementary crystallographic data for this paper. The data can be obtained free of charge from the Cambridge Crystallography Data Center via [www.ccdc.cam.ac.uk/data\\_request/cif](http://www.ccdc.cam.ac.uk/data_request/cif).

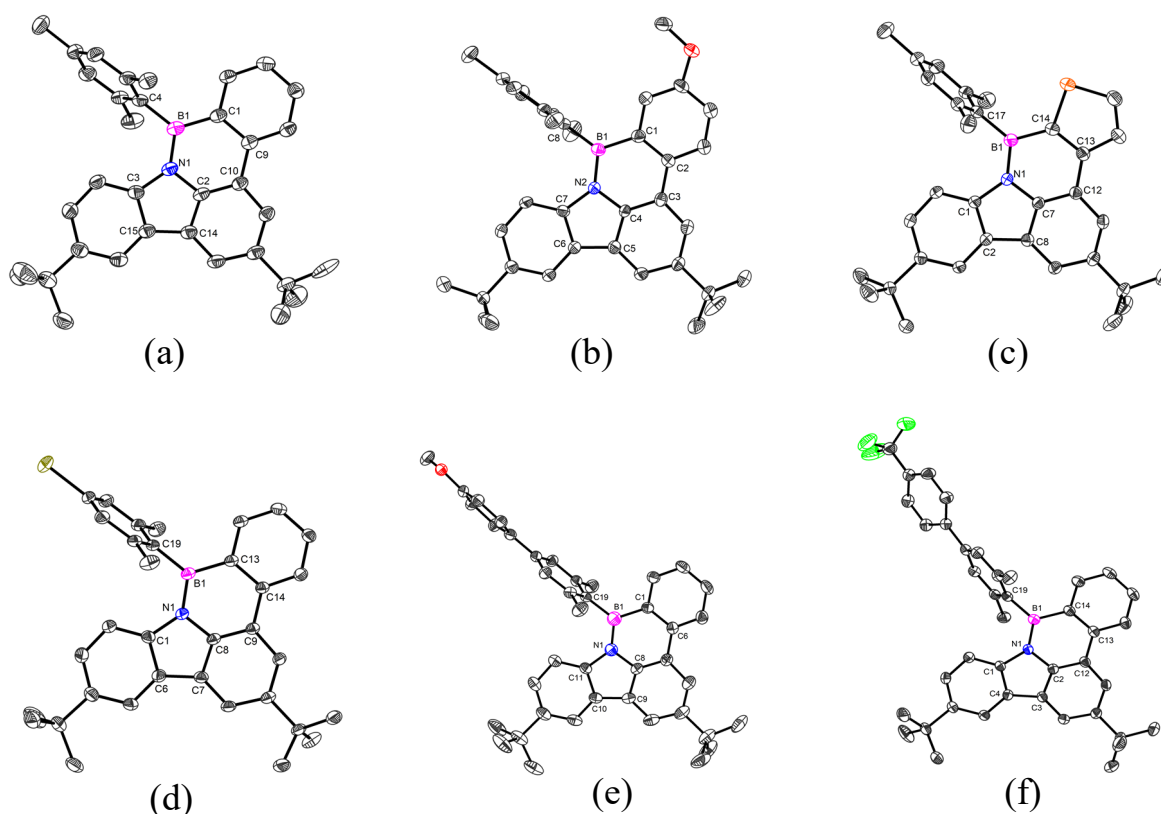

**Fig. S1** Molecular structures of **1** (a), **3** (b), **7** (c), **8** (d), **9** (e), and **10** (f). H atoms are omitted for clarity.



**Table S1** Crystal data and structure refinement for **1**.

|                                   |                                                                                                             |
|-----------------------------------|-------------------------------------------------------------------------------------------------------------|
| Empirical formula                 | C <sub>35</sub> H <sub>38</sub> B N                                                                         |
| Formula weight                    | 483.47                                                                                                      |
| Temperature                       | 150(2) K                                                                                                    |
| Wavelength                        | 0.71073 Å                                                                                                   |
| Crystal system                    | Monoclinic                                                                                                  |
| Space group                       | P2 <sub>1</sub> /c                                                                                          |
| Unit cell dimensions              | a = 18.9886(11) Å      α = 90°.<br>b = 11.5022(6) Å      β = 110.398(2)°.<br>c = 14.0085(6) Å      γ = 90°. |
| Volume                            | 2867.8(3) Å <sup>3</sup>                                                                                    |
| Z                                 | 4                                                                                                           |
| Density (calculated)              | 1.120 Mg/m <sup>3</sup>                                                                                     |
| Absorption coefficient            | 0.063 mm <sup>-1</sup>                                                                                      |
| F(000)                            | 1040                                                                                                        |
| Crystal size                      | 0.300 x 0.240 x 0.150 mm <sup>3</sup>                                                                       |
| Theta range for data collection   | 2.108 to 27.515°.                                                                                           |
| Index ranges                      | -22 ≤ h ≤ 24, -14 ≤ k ≤ 14, -17 ≤ l ≤ 18                                                                    |
| Reflections collected             | 30803                                                                                                       |
| Independent reflections           | 6578 [R(int) = 0.1233]                                                                                      |
| Completeness to theta = 25.242°   | 99.9 %                                                                                                      |
| Absorption correction             | None                                                                                                        |
| Refinement method                 | Full-matrix least-squares on F <sup>2</sup>                                                                 |
| Data / restraints / parameters    | 6578 / 46 / 378                                                                                             |
| Goodness-of-fit on F <sup>2</sup> | 1.011                                                                                                       |
| Final R indices [I > 2σ(I)]       | R1 = 0.0608, wR2 = 0.1245                                                                                   |
| R indices (all data)              | R1 = 0.1329, wR2 = 0.1628                                                                                   |
| Extinction coefficient            | n/a                                                                                                         |
| Largest diff. peak and hole       | 0.293 and -0.264 e.Å <sup>-3</sup>                                                                          |

**Table S2** Crystal data and structure refinement for **3**.

|                                   |                                             |                 |
|-----------------------------------|---------------------------------------------|-----------------|
| Identification code               | C: _0530ome_0m_a_sq                         |                 |
| Empirical formula                 | C41 H42 B N O                               |                 |
| Formula weight                    | 575.56                                      |                 |
| Temperature                       | 150(2) K                                    |                 |
| Wavelength                        | 0.71073 Å                                   |                 |
| Crystal system                    | Monoclinic                                  |                 |
| Space group                       | P2 <sub>1</sub> /c                          |                 |
| Unit cell dimensions              | a = 14.8622(9) Å                            | α = 90°.        |
|                                   | b = 10.8648(7) Å                            | β = 93.551(2)°. |
|                                   | c = 21.9339(10) Å                           | γ = 90°.        |
| Volume                            | 3535.0(4) Å <sup>3</sup>                    |                 |
| Z                                 | 4                                           |                 |
| Density (calculated)              | 1.081 Mg/m <sup>3</sup>                     |                 |
| Absorption coefficient            | 0.063 mm <sup>-1</sup>                      |                 |
| F(000)                            | 1232                                        |                 |
| Crystal size                      | 0.230 x 0.120 x 0.100 mm <sup>3</sup>       |                 |
| Theta range for data collection   | 2.093 to 24.760°.                           |                 |
| Index ranges                      | -17 ≤ h ≤ 17, -12 ≤ k ≤ 12, -23 ≤ l ≤ 25    |                 |
| Reflections collected             | 53077                                       |                 |
| Independent reflections           | 6022 [R(int) = 0.1423]                      |                 |
| Completeness to theta = 24.760°   | 99.4 %                                      |                 |
| Absorption correction             | None                                        |                 |
| Refinement method                 | Full-matrix least-squares on F <sup>2</sup> |                 |
| Data / restraints / parameters    | 6022 / 15 / 424                             |                 |
| Goodness-of-fit on F <sup>2</sup> | 1.025                                       |                 |
| Final R indices [I > 2σ(I)]       | R1 = 0.0536, wR2 = 0.1204                   |                 |
| R indices (all data)              | R1 = 0.0888, wR2 = 0.1483                   |                 |
| Extinction coefficient            | n/a                                         |                 |
| Largest diff. peak and hole       | 0.297 and -0.228 e.Å <sup>-3</sup>          |                 |

**Table S3** Crystal data and structure refinement for 7.

|                                   |                                                                                                    |
|-----------------------------------|----------------------------------------------------------------------------------------------------|
| Empirical formula                 | C <sub>33</sub> H <sub>34</sub> B N S                                                              |
| Formula weight                    | 487.48                                                                                             |
| Temperature                       | 150(2) K                                                                                           |
| Wavelength                        | 0.71073 Å                                                                                          |
| Crystal system                    | Orthorhombic                                                                                       |
| Space group                       | Pbca                                                                                               |
| Unit cell dimensions              | a = 10.7821(6) Å      α = 90°.<br>b = 22.6036(10) Å     β = 90°.<br>c = 22.7200(13) Å     γ = 90°. |
| Volume                            | 5537.2(5) Å <sup>3</sup>                                                                           |
| Z                                 | 8                                                                                                  |
| Density (calculated)              | 1.170 Mg/m <sup>3</sup>                                                                            |
| Absorption coefficient            | 0.139 mm <sup>-1</sup>                                                                             |
| F(000)                            | 2080                                                                                               |
| Crystal size                      | 0.180 x 0.140 x 0.100 mm <sup>3</sup>                                                              |
| Theta range for data collection   | 2.013 to 25.378°.                                                                                  |
| Index ranges                      | -12 ≤ h ≤ 12, -27 ≤ k ≤ 26, -27 ≤ l ≤ 27                                                           |
| Reflections collected             | 189664                                                                                             |
| Independent reflections           | 5060 [R(int) = 0.0944]                                                                             |
| Completeness to theta = 25.242°   | 99.6 %                                                                                             |
| Absorption correction             | None                                                                                               |
| Refinement method                 | Full-matrix least-squares on F <sup>2</sup>                                                        |
| Data / restraints / parameters    | 5060 / 0 / 334                                                                                     |
| Goodness-of-fit on F <sup>2</sup> | 1.055                                                                                              |
| Final R indices [I > 2σ(I)]       | R1 = 0.0478, wR2 = 0.1251                                                                          |
| R indices (all data)              | R1 = 0.0554, wR2 = 0.1341                                                                          |
| Extinction coefficient            | n/a                                                                                                |
| Largest diff. peak and hole       | 0.686 and -0.340 e.Å <sup>-3</sup>                                                                 |

**Table S4** Crystal data and structure refinement for **8**.

|                                   |                                             |                    |
|-----------------------------------|---------------------------------------------|--------------------|
| Empirical formula                 | C <sub>34</sub> H <sub>35</sub> B Br N      |                    |
| Formula weight                    | 548.35                                      |                    |
| Temperature                       | 150(2) K                                    |                    |
| Wavelength                        | 0.71073 Å                                   |                    |
| Crystal system                    | Monoclinic                                  |                    |
| Space group                       | P2 <sub>1</sub> /c                          |                    |
| Unit cell dimensions              | a = 18.6908(5) Å                            | α = 90°.           |
|                                   | b = 11.6182(3) Å                            | β = 109.9070(10)°. |
|                                   | c = 14.1142(4) Å                            | γ = 90°.           |
| Volume                            | 2881.81(14) Å <sup>3</sup>                  |                    |
| Z                                 | 4                                           |                    |
| Density (calculated)              | 1.264 Mg/m <sup>3</sup>                     |                    |
| Absorption coefficient            | 1.449 mm <sup>-1</sup>                      |                    |
| F(000)                            | 1144                                        |                    |
| Crystal size                      | 0.250 x 0.160 x 0.140 mm <sup>3</sup>       |                    |
| Theta range for data collection   | 2.101 to 27.503°.                           |                    |
| Index ranges                      | -24 ≤ h ≤ 24, -13 ≤ k ≤ 15, -18 ≤ l ≤ 18    |                    |
| Reflections collected             | 54434                                       |                    |
| Independent reflections           | 6606 [R(int) = 0.0674]                      |                    |
| Completeness to theta = 25.242°   | 99.8 %                                      |                    |
| Absorption correction             | None                                        |                    |
| Refinement method                 | Full-matrix least-squares on F <sup>2</sup> |                    |
| Data / restraints / parameters    | 6606 / 0 / 342                              |                    |
| Goodness-of-fit on F <sup>2</sup> | 1.063                                       |                    |
| Final R indices [I > 2σ(I)]       | R1 = 0.0394, wR2 = 0.0960                   |                    |
| R indices (all data)              | R1 = 0.0480, wR2 = 0.1018                   |                    |
| Extinction coefficient            | n/a                                         |                    |
| Largest diff. peak and hole       | 0.834 and -0.256 e.Å <sup>-3</sup>          |                    |

**Table S5** Crystal data and structure refinement for **9**.

|                                   |                                                                                                           |
|-----------------------------------|-----------------------------------------------------------------------------------------------------------|
| Empirical formula                 | C <sub>41</sub> H <sub>42</sub> B N O                                                                     |
| Formula weight                    | 575.56                                                                                                    |
| Temperature                       | 150(2) K                                                                                                  |
| Wavelength                        | 0.71073 Å                                                                                                 |
| Crystal system                    | Monoclinic                                                                                                |
| Space group                       | P2 <sub>1</sub> /c                                                                                        |
| Unit cell dimensions              | a = 14.8622(9) Å      α = 90°.<br>b = 10.8648(7) Å      β = 93.551(2)°.<br>c = 21.9339(10) Å     γ = 90°. |
| Volume                            | 3535.0(4) Å <sup>3</sup>                                                                                  |
| Z                                 | 4                                                                                                         |
| Density (calculated)              | 1.081 Mg/m <sup>3</sup>                                                                                   |
| Absorption coefficient            | 0.063 mm <sup>-1</sup>                                                                                    |
| F(000)                            | 1232                                                                                                      |
| Crystal size                      | 0.230 x 0.120 x 0.100 mm <sup>3</sup>                                                                     |
| Theta range for data collection   | 2.093 to 24.760°.                                                                                         |
| Index ranges                      | -17 ≤ h ≤ 17, -12 ≤ k ≤ 12, -23 ≤ l ≤ 25                                                                  |
| Reflections collected             | 53077                                                                                                     |
| Independent reflections           | 6022 [R(int) = 0.1423]                                                                                    |
| Completeness to theta = 24.760°   | 99.4 %                                                                                                    |
| Absorption correction             | None                                                                                                      |
| Refinement method                 | Full-matrix least-squares on F <sup>2</sup>                                                               |
| Data / restraints / parameters    | 6022 / 15 / 424                                                                                           |
| Goodness-of-fit on F <sup>2</sup> | 1.025                                                                                                     |
| Final R indices [I > 2σ(I)]       | R1 = 0.0536, wR2 = 0.1204                                                                                 |
| R indices (all data)              | R1 = 0.0888, wR2 = 0.1483                                                                                 |
| Extinction coefficient            | n/a                                                                                                       |
| Largest diff. peak and hole       | 0.297 and -0.228 e.Å <sup>-3</sup>                                                                        |

**Table S6** Crystal data and structure refinement for **10**.

|                                   |                                                                                                              |
|-----------------------------------|--------------------------------------------------------------------------------------------------------------|
| Empirical formula                 | C <sub>41</sub> H <sub>39</sub> B F <sub>3</sub> N                                                           |
| Formula weight                    | 613.54                                                                                                       |
| Temperature                       | 150(2) K                                                                                                     |
| Wavelength                        | 0.71073 Å                                                                                                    |
| Crystal system                    | Monoclinic                                                                                                   |
| Space group                       | P2 <sub>1</sub> /n                                                                                           |
| Unit cell dimensions              | a = 15.7996(5) Å      α = 90°.<br>b = 11.0848(3) Å      β = 103.4970(10)°.<br>c = 19.6140(6) Å      γ = 90°. |
| Volume                            | 3340.23(17) Å <sup>3</sup>                                                                                   |
| Z                                 | 4                                                                                                            |
| Density (calculated)              | 1.220 Mg/m <sup>3</sup>                                                                                      |
| Absorption coefficient            | 0.081 mm <sup>-1</sup>                                                                                       |
| F(000)                            | 1296                                                                                                         |
| Crystal size                      | 0.250 x 0.170 x 0.070 mm <sup>3</sup>                                                                        |
| Theta range for data collection   | 1.886 to 27.492°.                                                                                            |
| Index ranges                      | -20 ≤ h ≤ 20, -14 ≤ k ≤ 12, -25 ≤ l ≤ 25                                                                     |
| Reflections collected             | 63998                                                                                                        |
| Independent reflections           | 7658 [R(int) = 0.0879]                                                                                       |
| Completeness to theta = 25.242°   | 99.8 %                                                                                                       |
| Absorption correction             | None                                                                                                         |
| Refinement method                 | Full-matrix least-squares on F <sup>2</sup>                                                                  |
| Data / restraints / parameters    | 7658 / 51 / 459                                                                                              |
| Goodness-of-fit on F <sup>2</sup> | 1.037                                                                                                        |
| Final R indices [I > 2σ(I)]       | R1 = 0.0559, wR2 = 0.1374                                                                                    |
| R indices (all data)              | R1 = 0.0761, wR2 = 0.1571                                                                                    |
| Extinction coefficient            | n/a                                                                                                          |
| Largest diff. peak and hole       | 0.414 and -0.435 e.Å <sup>-3</sup>                                                                           |

### 3. Photophysical properties

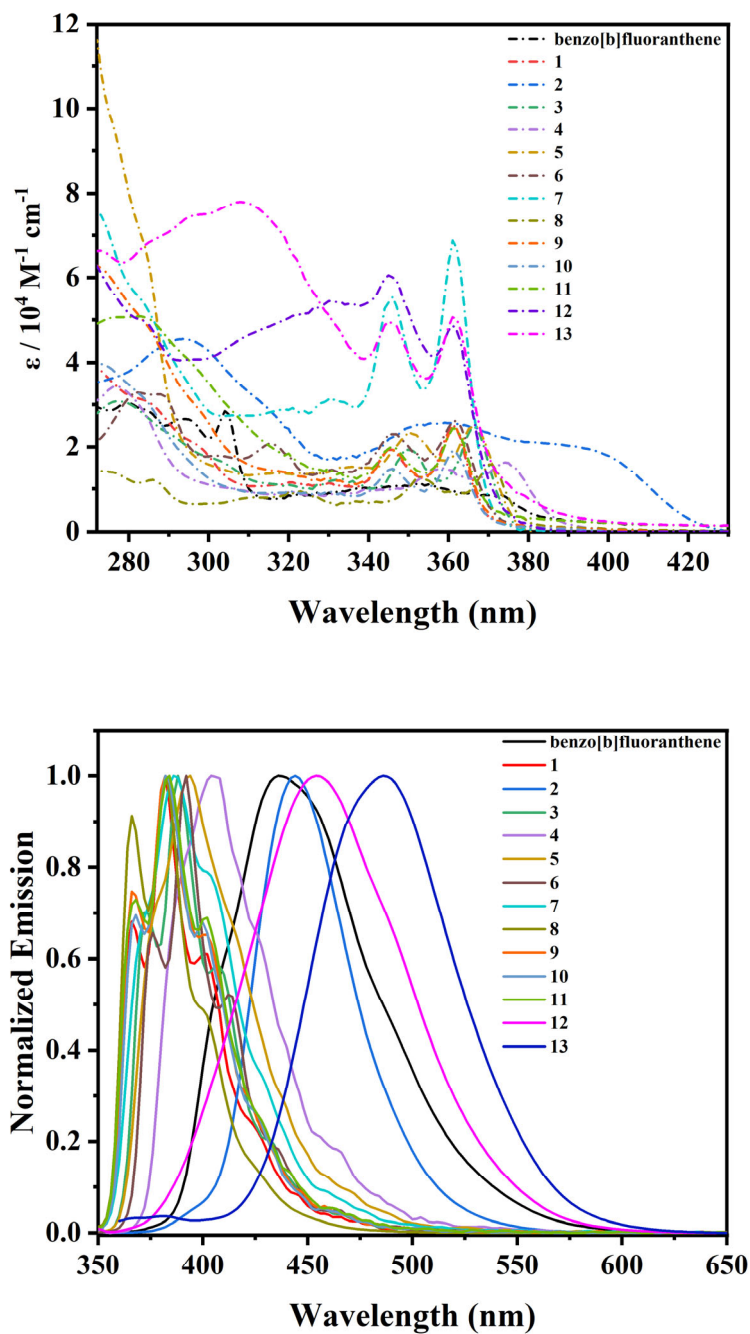

**Fig. S2** UV-Vis absorption (top) and fluorescence (bottom) spectra of “parental” benzo[*b*]fluoranthene and **1-13** in dichloromethane at the concentration of  $1 \times 10^{-5}$  M.

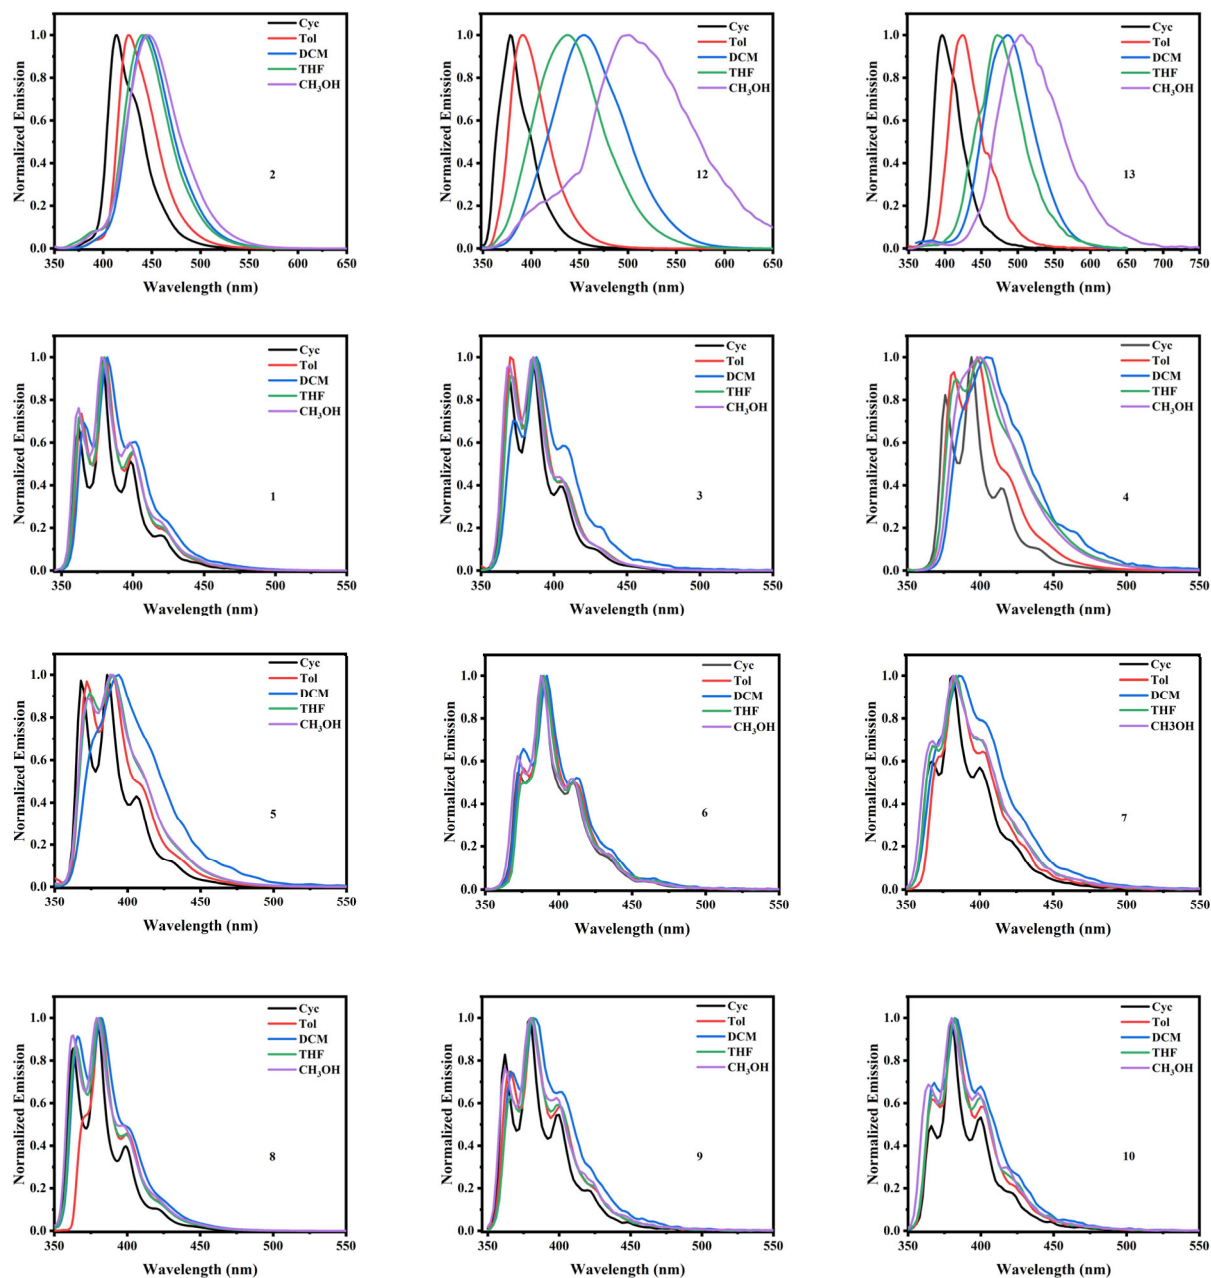

**Fig. S3** Fluorescence spectra of **1-13** in various solvents at the concentration of  $1 \times 10^{-5}$  M. **2**, **12**, and **13** show noticeable solvatochromism and **1** and **3-13** show neglectable solvatochromism.



**Table S7** Photophysical data for compounds **1–13**

| Comp      | $\lambda_{\text{abs}}^{\text{a}}$<br>nm | $\varepsilon$ ( $\text{M}^{-1} \text{cm}^{-1}$ ) <sup>b</sup> | $\lambda_{\text{em}} (\lambda_{\text{ex}})^{\text{c}}$<br>nm | Lifetime <sup>d</sup><br>$\tau$ (ns) | $\Phi_{\text{pl}}^{\text{d}}$<br>% |
|-----------|-----------------------------------------|---------------------------------------------------------------|--------------------------------------------------------------|--------------------------------------|------------------------------------|
| <b>1</b>  | 346, 361                                | 25241 (361)                                                   | 366, 382, 402 (343)                                          | 3.18                                 | 60.48                              |
| <b>2</b>  | 359, 391                                | 20206 (391)                                                   | 444 (347)                                                    | 4.81                                 | 52.37                              |
| <b>3</b>  | 350, 366                                | 24660 (366)                                                   | 373, 388, 406 (347)                                          | 3.02                                 | 52.71                              |
| <b>4</b>  | 358, 374                                | 16289 (374)                                                   | 404 (346)                                                    | 3.65                                 | 44.87                              |
| <b>5</b>  | 350, 366                                | 24716 (366)                                                   | 394 (346)                                                    | 3.29                                 | 49.93                              |
| <b>6</b>  | 353, 371                                | 15730 (371)                                                   | 376, 392, 412 (346)                                          | 1.83                                 | 31.28                              |
| <b>7</b>  | 346, 361                                | 25992 (361)                                                   | 386, 402 (344)                                               | 1.64                                 | 25.51                              |
| <b>8</b>  | 346, 361                                | 68761 (361)                                                   | 366, 382 (343)                                               | 2.90                                 | 53.92                              |
| <b>9</b>  | 346, 361                                | 24810 (361)                                                   | 366, 382, 402 (343)                                          | 2.95                                 | 54.51                              |
| <b>10</b> | 346, 361                                | 19143 (361)                                                   | 368, 382, 400 (343)                                          | 3.02                                 | 56.34                              |
| <b>11</b> | 346, 361                                | 24280 (361)                                                   | 368, 384, 402 (343)                                          | 2.95                                 | 58.04                              |
| <b>12</b> | 346, 361                                | 48672 (361)                                                   | 454 (343)                                                    | 9.05                                 | 43.86                              |
| <b>13</b> | 345, 361                                | 50561 (361)                                                   | 486 (343)                                                    | 16.94                                | 22.48                              |

<sup>a</sup>Absorption ( $\lambda_{\text{abs}}$ ) maxima measured in DCM. <sup>b</sup>Molar Absorption Coefficient  $\varepsilon = A/bc$ .

<sup>c</sup>Emission maxima ( $\lambda_{\text{em}}$ ) measured in DCM. <sup>d</sup>Measured in DCM at the concentration of  $1 \times 10^{-5}$  M.

#### 4. Device performance

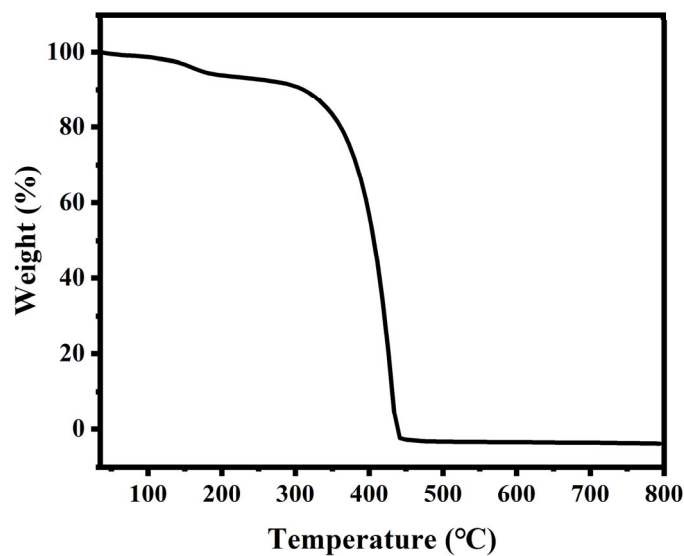**Fig. S4** The TG curve of **2**.

**Table S8** EL performance of the OLEDs.

| Device | Dopant      | $V_{\text{turn-on}}$<br>(V) | Luminance $L_{\text{max}}^a$<br>(cd m <sup>-2</sup> ) | $\eta_{\text{ext}}$ (%)                    | $\eta_L$<br>(cd A <sup>-1</sup> ) | $\eta_P$<br>(lm W <sup>-1</sup> ) | $\lambda_{\text{max}}^c$<br>(nm) |
|--------|-------------|-----------------------------|-------------------------------------------------------|--------------------------------------------|-----------------------------------|-----------------------------------|----------------------------------|
| A1     | 2 (4.0 wt%) | 4.5                         | 964 (14)                                              | 1 (4.5) <sup>a</sup><br>0.94 <sup>b</sup>  | 1.28 (4.5)<br>0.93                | 0.89 (4.5)<br>0.32                | 448<br>(0.19,0.12)               |
| A2     | 2 (6.0 wt%) | 4                           | 958 (14.5)                                            | 1.02 (4) <sup>a</sup><br>0.88 <sup>b</sup> | 1.76 (4)<br>0.95                  | 1.39 (4)<br>0.33                  | 448<br>(0.20,0.14)               |
| A3     | 2 (8.0 wt%) | 4                           | 950 (14)                                              | 0.86 (4) <sup>a</sup><br>0.74 <sup>b</sup> | 1.68 (4)<br>0.88                  | 1.32 (4)<br>0.32                  | 448<br>(0.23,0.16)               |

<sup>a</sup>Maximum values of the devices. Values in the parentheses are the voltage at which they were obtained. <sup>b</sup>Values were collected at *ca.* 100cd m<sup>-2</sup>. <sup>c</sup>Values were collected at 8 V and CIE coordinates (x,y) are shown in parentheses.

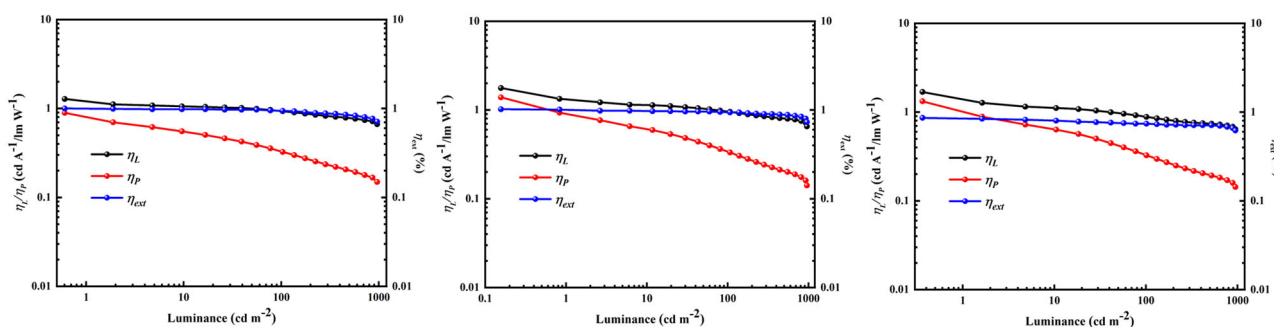

**Fig. S5** Relationship between EL efficiencies and luminance for the devices with doping levels of 4 wt% (left), 6 wt% (middle), and 8 wt% (right).

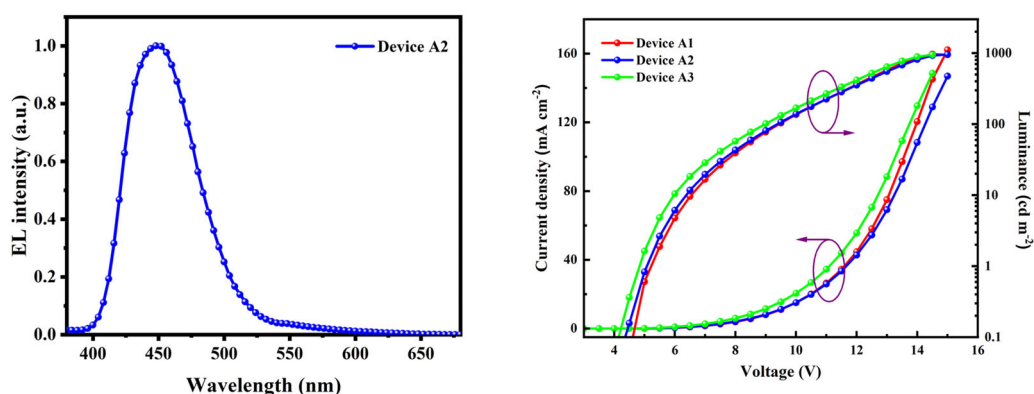

**Fig. S6** EL spectrum for the device A2 and current density-voltage-luminance ( $J$ - $V$ - $L$ ) characteristics for the OLEDs.

## 5. Computational details

All quantum chemical calculations were carried out using Gaussian 09.<sup>S3</sup> The geometries of all compounds were optimized by using the hybrid functional B3LYP with the 6-31G(d) basis set. In addition, frequency calculations are carried out at the same level of theory to confirm the stationary points are minima with no imaginary frequencies. Nucleus-independent chemical shifts (NICS) were calculated using the gauge invariant atomic orbital (GIAO) approach at the same level of theory. For excited singlet states, we employed time-dependent density functional theory (TD-DFT) at the same level of theory to predict absorption and emission frequencies in dichloromethane.

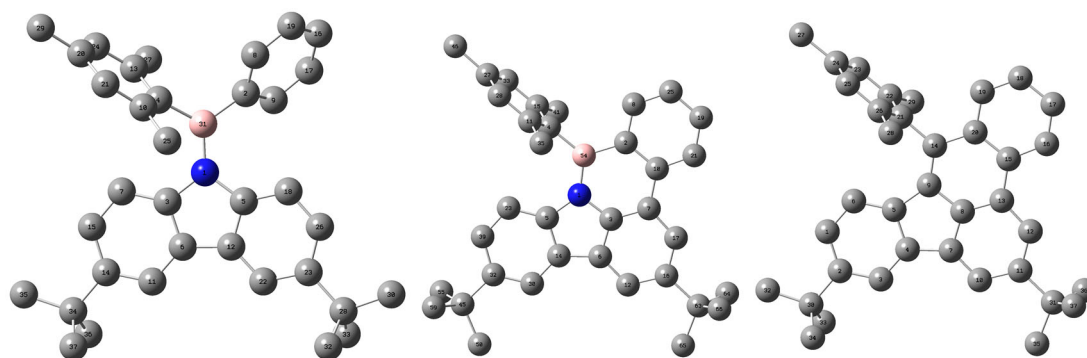

**Fig. S7** Optimized structure of **1'** (left), **1** (middle), and **C-1** (right). (Hydrogen atoms were omitted for clarity)

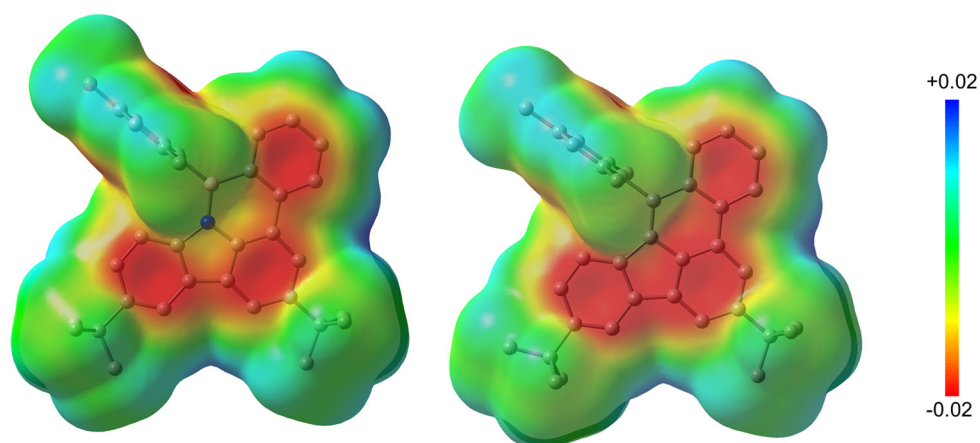

**Fig. S8** Calculated electrostatic potential (ESP) distribution maps of **1** and **C-1**. Red colour being the electron-rich region and blue being the electron-deficient region.

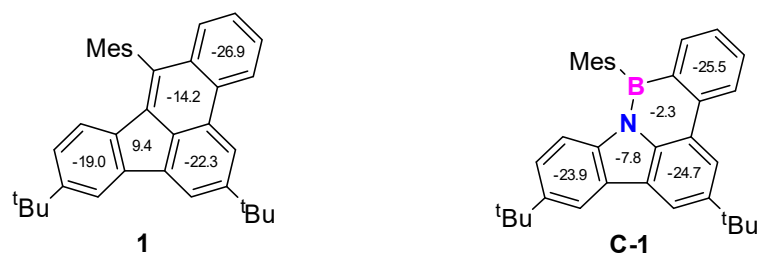

**Fig. S9** Calculated NICS(1)<sub>zz</sub> values for **1** and **C-1**.

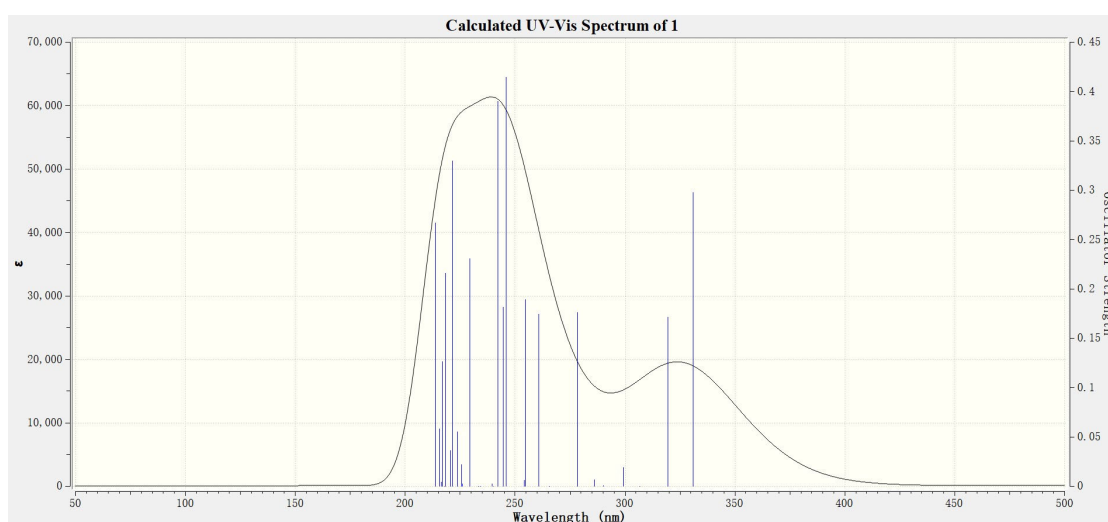

**Fig. S10** Calculated UV-Vis spectrum of **1** at B<sub>3</sub>LYP/6-31 G(d) level of theory. The solvent effect of DCM is accounted for by the CPCM solvation model.

**Table S9** TDDFT description of first 5 electronically excited states in **1**

Excitation energies and oscillator strengths of the excited states with high oscillator strengths are marked in bold. The highest occupied molecular orbital of **1** is MO 130.

|                  |                 |                  |                  |                 |                           |
|------------------|-----------------|------------------|------------------|-----------------|---------------------------|
| Excited State 1: | Singlet-A       | <b>3.7472 eV</b> | <b>330.87 nm</b> | <b>f=0.2977</b> | <b>&lt;S**2&gt;=0.000</b> |
| 129 ->131        | <b>0.44302</b>  |                  |                  |                 |                           |
| 130 ->131        | <b>0.52473</b>  |                  |                  |                 |                           |
| Excited State 2: | Singlet-A       | <b>3.8800 eV</b> | <b>319.54 nm</b> | <b>f=0.1714</b> | <b>&lt;S**2&gt;=0.000</b> |
| 127 ->131        | <b>-0.16181</b> |                  |                  |                 |                           |
| 129 ->131        | <b>0.50650</b>  |                  |                  |                 |                           |
| 130 ->131        | <b>-0.43309</b> |                  |                  |                 |                           |
| Excited State 3: | Singlet-A       | 4.0406 eV        | 306.85 nm        | f=0.0000        | <S**2>=0.000              |
| 128 ->131        | 0.69053         |                  |                  |                 |                           |
| 128 ->132        | -0.14177        |                  |                  |                 |                           |
| Excited State 4: | Singlet-A       | 4.1432 eV        | 299.25 nm        | f=0.0192        | <S**2>=0.000              |
| 126 ->131        | -0.14530        |                  |                  |                 |                           |
| 127 ->131        | 0.58425         |                  |                  |                 |                           |
| 129 ->131        | 0.10642         |                  |                  |                 |                           |
| 129 ->132        | -0.31900        |                  |                  |                 |                           |
| Excited State 5: | Singlet-A       | 4.2698 eV        | 290.38 nm        | f=0.0004        | <S**2>=0.000              |
| 126 ->131        | 0.66636         |                  |                  |                 |                           |
| 126 ->132        | -0.10220        |                  |                  |                 |                           |
| 127 ->131        | 0.19875         |                  |                  |                 |                           |

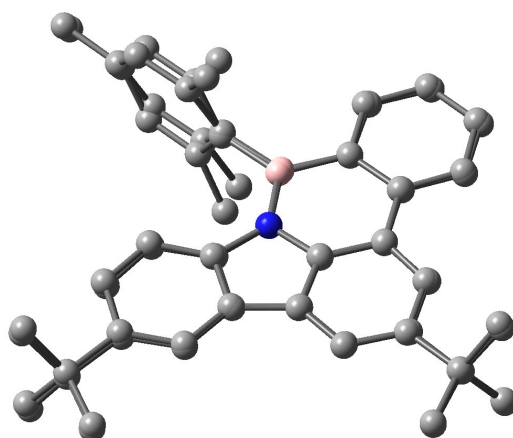

**Fig. S11** The comparison of the optimized  $S_0$  and  $S_1$  structures for **1**, and the twisted angles between the mesityl groups and the B/N involved-rings are  $101.8^\circ$  ( $S_1$ ) and  $90.74^\circ$  ( $S_0$ ).

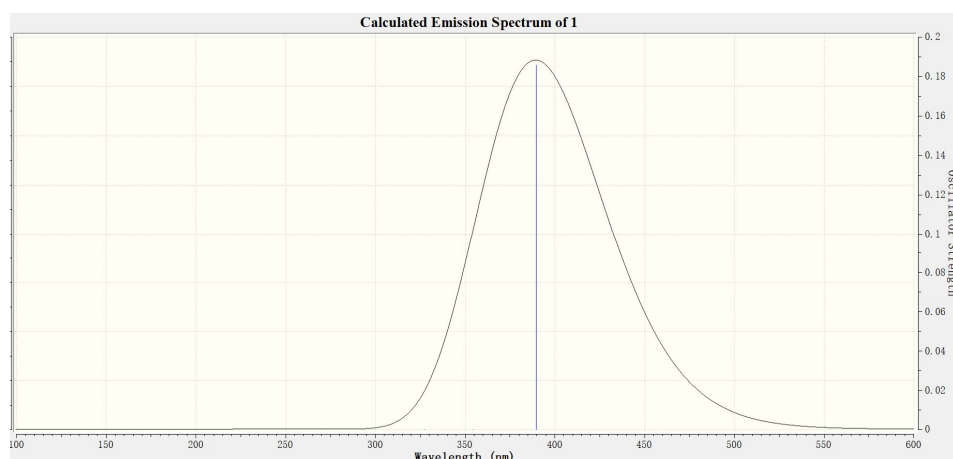

**Fig. S12** Calculated emission spectrum from TDDFT excitations for **1**

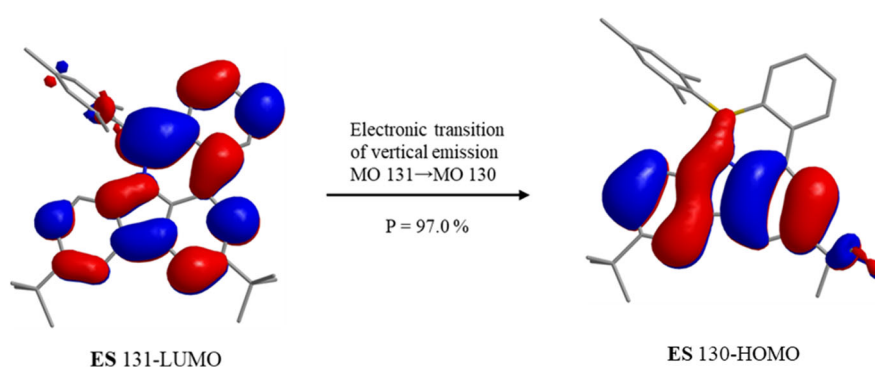

**Fig. S13** The calculated orbitals HOMO and LUMO of the excited state (ES) most likely involved in the vertical transition of emission for compound **1** in DCM.

Output for TDDFT excitations for emission of **1**

The highest occupied molecular orbital of **1** is MO 130.

Excitation energies and oscillator strengths:

|               |           |           |           |           |          |              |
|---------------|-----------|-----------|-----------|-----------|----------|--------------|
| Excited State | 1:        | Singlet-A | 3.1832 eV | 389.50 nm | f=0.1858 | <S**2>=0.000 |
|               | 130 ->131 | -0.69626  |           |           |          |              |
| Excited State | 2:        | Singlet-A | 3.4985 eV | 354.39 nm | f=0.4821 | <S**2>=0.000 |
|               | 129 ->131 | -0.68907  |           |           |          |              |
| Excited State | 3:        | Singlet-A | 3.7871 eV | 327.38 nm | f=0.0345 | <S**2>=0.000 |
|               | 128 ->131 | 0.69632   |           |           |          |              |

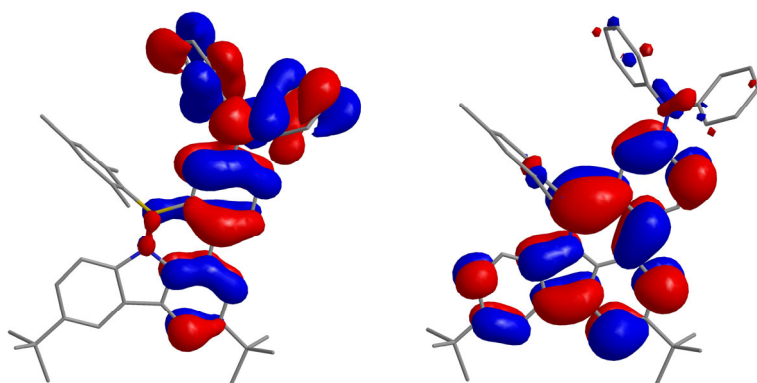

**Fig. S14** The HOMO and LUMO orbitals for **2**.

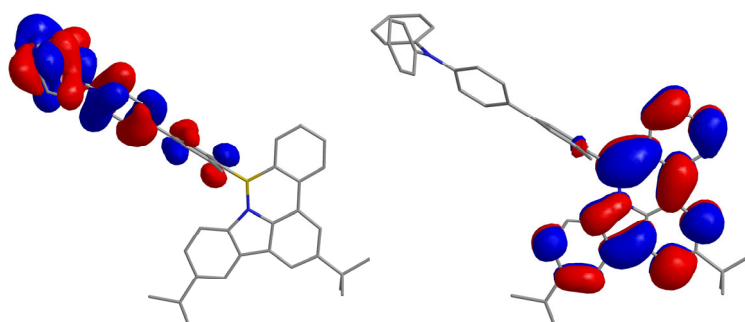

**Fig. S15** The HOMO and LUMO orbitals for **12**.

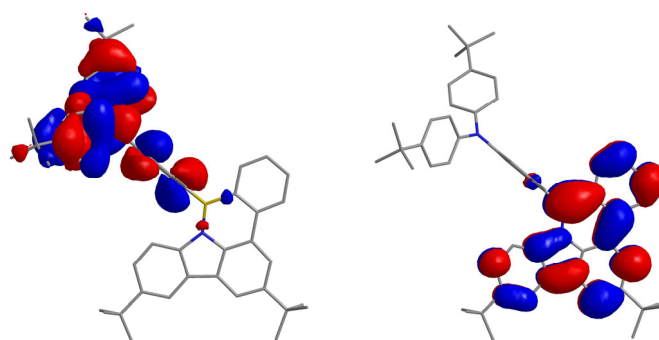

**Fig. S16** The HOMO and LUMO orbitals for **13**.

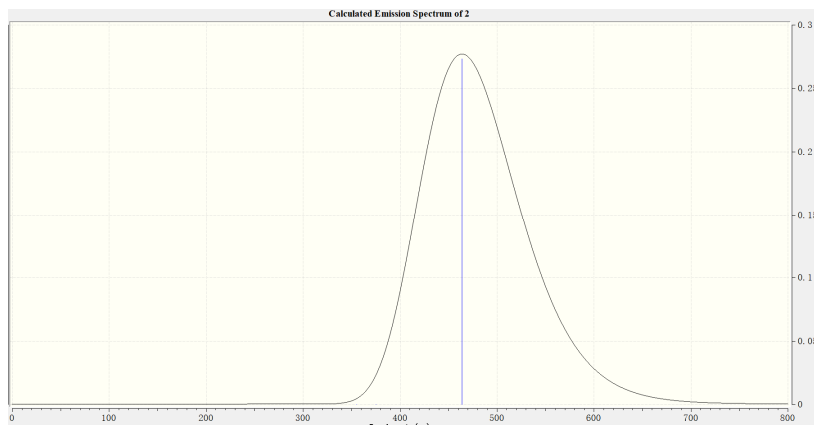

**Fig. S17** Calculated emission spectrum from TDDFT excitations for **2**.

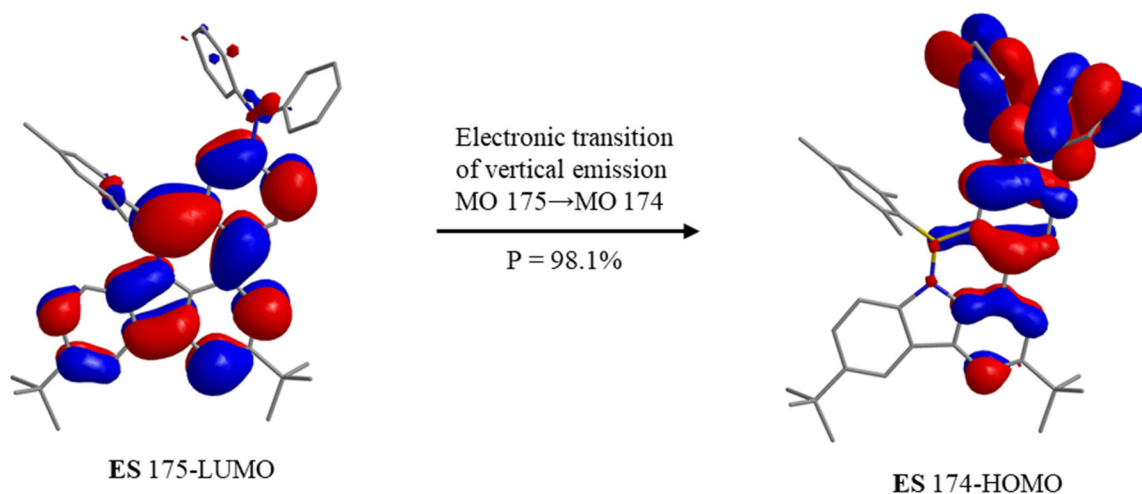

**Fig. S18** The calculated orbitals HOMO and LUMO of the excited state (ES) most likely involved in the vertical transition of emission for compound **2** in DCM.

Output for TDDFT excitations for emission of **2**

The highest occupied molecular orbital of **2** is MO 174.

Excitation energies and oscillator strengths:

|                  |           |           |           |          |              |
|------------------|-----------|-----------|-----------|----------|--------------|
| Excited State 1: | Singlet-A | 2.6717 eV | 464.06 nm | f=0.2734 | <S**2>=0.000 |
| 174 ->175        | 0.70021   |           |           |          |              |
| Excited State 2: | Singlet-A | 3.3062 eV | 375.01 nm | f=0.2689 | <S**2>=0.000 |
| 174 ->176        | 0.68817   |           |           |          |              |
| Excited State 3: | Singlet-A | 3.4961 eV | 354.63 nm | f=0.1201 | <S**2>=0.000 |



172 ->175      -0.43271  
 173 ->175      0.53611

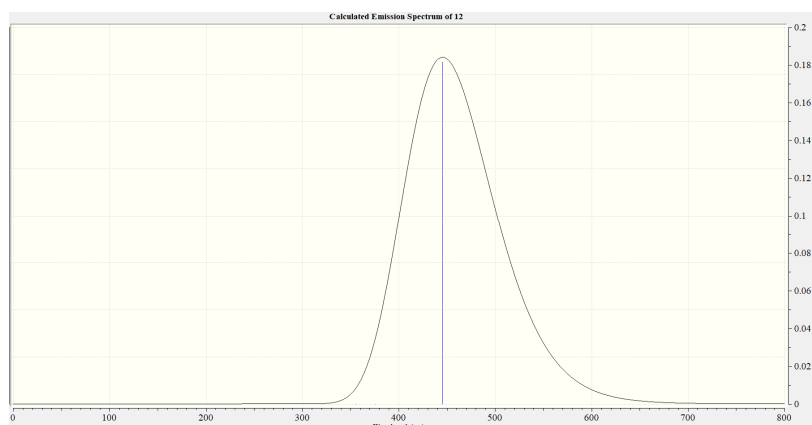

**Fig. S19** Calculated emission spectrum from TDDFT excitations for **12**.

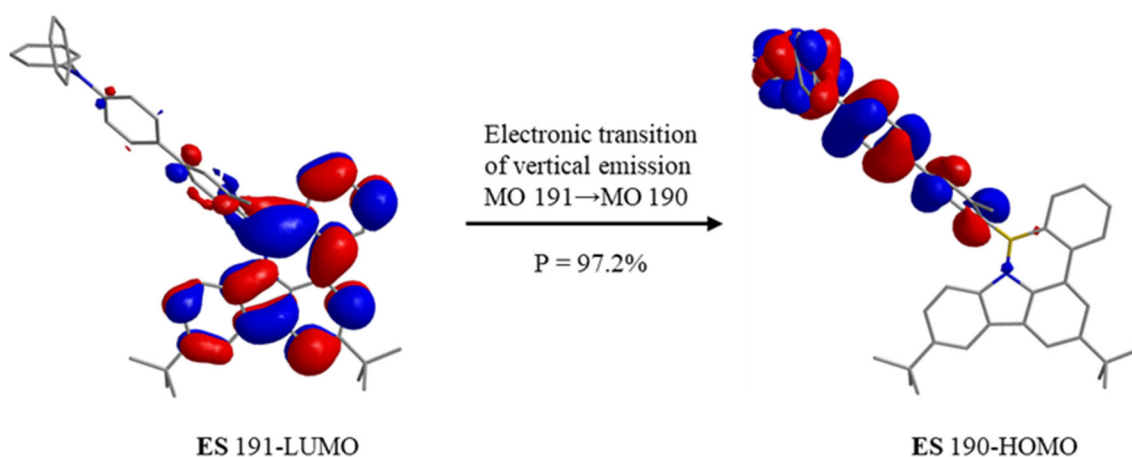

**Fig. S20** The calculated orbitals HOMO and LUMO of the excited state (ES) most likely involved in the vertical transition of emission for compound **12** in DCM.

Output for TDDFT excitations for emission of **12**

The highest occupied molecular orbital of **12** is MO 190.

Excitation energies and oscillator strengths:

|                  |           |           |           |          |              |
|------------------|-----------|-----------|-----------|----------|--------------|
| Excited State 1: | Singlet-A | 2.7819 eV | 445.68 nm | f=0.1817 | <S**2>=0.000 |
| 190 ->191        | -0.69696  |           |           |          |              |
| Excited State 2: | Singlet-A | 3.2973 eV | 376.02 nm | f=1.1148 | <S**2>=0.000 |
| 189 ->191        | -0.11113  |           |           |          |              |

|                  |           |           |           |          |              |  |
|------------------|-----------|-----------|-----------|----------|--------------|--|
| 190 ->192        | 0.61703   |           |           |          |              |  |
| 190 ->193        | -0.30460  |           |           |          |              |  |
| Excited State 3: | Singlet-A | 3.4856 eV | 355.70 nm | f=0.4558 | <S**2>=0.000 |  |
| 188 ->191        | -0.29779  |           |           |          |              |  |
| 189 ->191        | -0.61756  |           |           |          |              |  |
| 190 ->192        | -0.10751  |           |           |          |              |  |

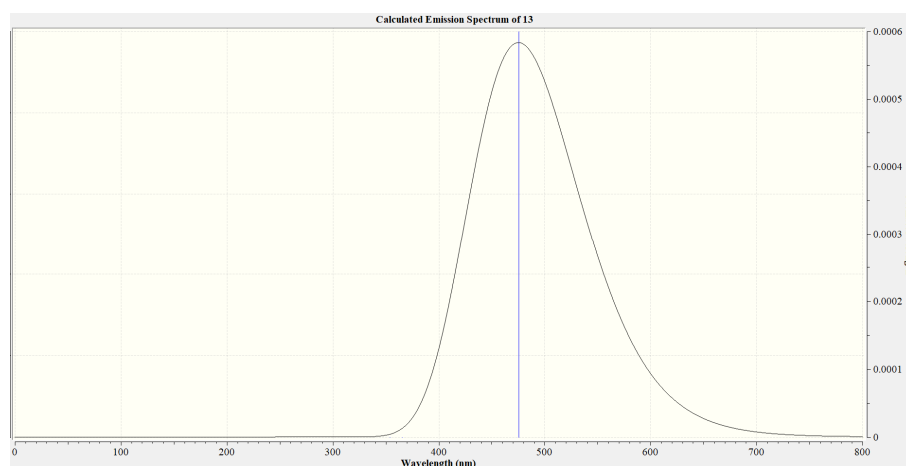

**Fig. S21** The Calculated emission spectrum from TDDFT excitations for **13**.

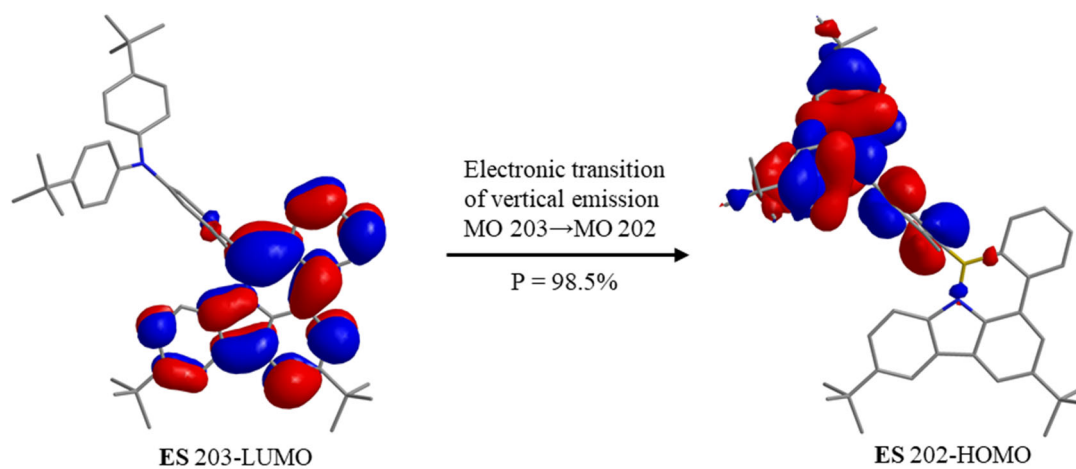

**Fig. S22** The calculated orbitals HOMO and LUMO of excited state (ES) most likely involved in the vertical transition of emission for compound **13** in DCM.

Output for TDDFT excitations for emission of **13**

The highest occupied molecular orbital of **13** is MO 203.

|                         |                  |                  |                  |                 |                           |
|-------------------------|------------------|------------------|------------------|-----------------|---------------------------|
| <b>Excited State 1:</b> | <b>Singlet-A</b> | <b>2.6080 eV</b> | <b>475.40 nm</b> | <b>f=0.0006</b> | <b>&lt;S**2&gt;=0.000</b> |
| 202 ->203               | 0.70177          |                  |                  |                 |                           |
| Excited State 2:        | Singlet-A        | 3.3902 eV        | 365.71 nm        | f=0.0027        | <S**2>=0.000              |
| 202 ->204               | 0.70062          |                  |                  |                 |                           |
| Excited State 3:        | Singlet-A        | 3.5057 eV        | 353.66 nm        | f=0.3671        | <S**2>=0.000              |
| 200 ->203               | -0.67927         |                  |                  |                 |                           |
| 201 ->203               | 0.10064          |                  |                  |                 |                           |

**Table S10** Cartesian Coordinates for **1'-S<sub>0</sub>** (ground state)

|   |           |           |           |   |           |           |           |
|---|-----------|-----------|-----------|---|-----------|-----------|-----------|
| N | 0.264025  | -0.403595 | -0.118980 | C | -6.010346 | -1.705064 | -0.605676 |
| C | 1.708790  | -2.546078 | -0.612647 | C | -1.581617 | 5.047742  | -0.632021 |
| C | 0.011151  | 0.996241  | -0.233890 | C | -0.481114 | 6.105529  | -0.840944 |
| C | 2.864856  | -0.277502 | 0.294988  | C | -2.539950 | 5.107507  | -1.845299 |
| C | -1.013594 | -1.015745 | 0.061875  | C | -2.361255 | 5.415404  | 0.652913  |
| C | -1.377459 | 1.244446  | -0.172136 | H | 1.960600  | 1.904999  | -0.508818 |
| C | 0.891475  | 2.057023  | -0.444406 | H | 3.232043  | -3.026363 | 0.839872  |
| C | 2.648563  | -3.397665 | 0.000965  | H | 0.276842  | -2.421855 | -2.227435 |
| C | 1.003968  | -3.053823 | -1.723854 | H | -2.951538 | 2.698802  | -0.250631 |
| C | 3.038584  | 0.079122  | 1.653799  | H | 1.072087  | 4.155892  | -0.719437 |
| C | -1.877578 | 2.540223  | -0.301256 | H | 2.304132  | -6.193004 | -1.908967 |
| C | -2.028943 | -0.035608 | 0.028765  | H | 0.674519  | -4.708697 | -3.061876 |
| C | 3.913764  | -0.003084 | -0.616360 | H | -0.592983 | -3.111290 | 0.427276  |
| C | -1.010620 | 3.623032  | -0.496633 | H | 3.568931  | -5.345559 | 0.057809  |
| C | 0.368041  | 3.346278  | -0.564748 | H | 4.352184  | 0.942764  | 3.119043  |
| C | 2.139448  | -5.180488 | -1.549026 | H | -4.124897 | 0.391626  | 0.183081  |
| C | 1.221981  | -4.347370 | -2.194982 | H | 5.869838  | 0.842349  | -0.886375 |
| C | -1.346836 | -2.339637 | 0.346266  | H | 1.556636  | -1.188800 | 2.635096  |
| C | 2.849671  | -4.704321 | -0.445413 | H | 2.330384  | -0.006872 | 3.696447  |
| C | 5.265882  | 0.964620  | 1.174318  | H | 1.101665  | 0.510928  | 2.535233  |
| C | 4.231620  | 0.681813  | 2.068884  | H | -2.925946 | -3.704567 | 0.742933  |
| C | -3.366361 | -0.385880 | 0.217211  | H | 4.643026  | 0.020192  | -2.654371 |
| C | -3.727471 | -1.716417 | 0.463337  | H | 3.701317  | -1.422550 | -2.246774 |
| C | 5.081373  | 0.621219  | -0.168760 | H | 2.882507  | 0.112172  | -2.528775 |
| C | 1.951303  | -0.166863 | 2.681952  | H | 6.404482  | 2.180266  | 2.560019  |
| C | -2.691328 | -2.667477 | 0.531860  | H | 7.315227  | 0.836204  | 1.864670  |
| C | 3.779208  | -0.341233 | -2.087272 | H | 6.976077  | 2.263423  | 0.883761  |
| C | -5.210273 | -2.084487 | 0.663147  | H | -6.480829 | -3.800920 | 1.051424  |
| C | 6.554476  | 1.597587  | 1.644911  | H | -5.054283 | -4.199933 | 0.086080  |
| C | -5.413195 | -3.589531 | 0.922578  | H | -4.899749 | -3.920111 | 1.832633  |
| B | 1.557167  | -1.049696 | -0.147593 | H | -6.836190 | -1.555742 | 2.027080  |
| C | -5.777984 | -1.308819 | 1.875614  | H | -5.705926 | -0.225051 | 1.736183  |

|   |           |           |           |   |           |          |           |
|---|-----------|-----------|-----------|---|-----------|----------|-----------|
| H | -5.234433 | -1.563711 | 2.792549  | H | -2.961407 | 6.114882 | -1.951589 |
| H | -5.636469 | -2.248257 | -1.481129 | H | -3.374887 | 4.406833 | -1.739797 |
| H | -7.071448 | -1.953259 | -0.478432 | H | -2.012263 | 4.859769 | -2.773414 |
| H | -5.942574 | -0.634189 | -0.824457 | H | -1.704390 | 5.390166 | 1.529897  |
| H | -0.936275 | 7.098557  | -0.929656 | H | -2.781066 | 6.425721 | 0.570717  |
| H | 0.219398  | 6.137588  | 0.001268  | H | -3.190365 | 4.724323 | 0.837975  |
| H | 0.092627  | 5.922738  | -1.756653 |   |           |          |           |

**Table S11** Cartesian Coordinates for **1-S<sub>0</sub>** (ground state)

|   |           |           |           |   |           |           |           |
|---|-----------|-----------|-----------|---|-----------|-----------|-----------|
| N | -0.237543 | -0.320070 | -0.000005 | C | -4.840118 | -0.896866 | 1.198151  |
| C | -0.541251 | -2.827625 | -0.000021 | H | -5.375815 | -0.824538 | 2.143381  |
| C | 1.139793  | -0.570559 | -0.000016 | C | -2.725377 | -1.153409 | -2.542527 |
| C | -2.738916 | -1.170004 | 0.000016  | H | -3.427540 | -1.150807 | -3.382429 |
| C | -0.384036 | 1.093766  | 0.000018  | H | -2.116416 | -2.062621 | -2.618149 |
| C | 1.874007  | 0.626797  | 0.000007  | H | -2.046220 | -0.301464 | -2.676504 |
| C | 1.739481  | -1.834068 | -0.000030 | C | -1.389793 | 3.260989  | 0.000023  |
| C | -1.368211 | -3.970971 | -0.000027 | H | -2.292584 | 3.864889  | 0.000030  |
| H | -2.446047 | -3.831508 | -0.000011 | C | -2.725545 | -1.154275 | 2.542544  |
| C | 0.872931  | -3.019095 | -0.000043 | H | -2.045273 | -0.303191 | 2.676278  |
| C | -3.453125 | -1.078179 | -1.216070 | H | -2.117764 | -2.064265 | 2.618404  |
| C | 3.267518  | 0.578387  | 0.000020  | H | -3.427693 | -1.150545 | 3.382454  |
| H | 3.834549  | 1.502279  | 0.000045  | C | -0.062590 | 5.440112  | 0.000059  |
| C | 0.891363  | 1.701255  | 0.000028  | C | -7.057146 | -0.644275 | -0.000073 |
| C | -3.453208 | -1.078506 | 1.216070  | H | -7.563490 | -1.619170 | -0.001000 |
| C | 3.922779  | -0.664785 | 0.000001  | H | -7.402338 | -0.100287 | -0.886049 |
| C | 3.145776  | -1.837455 | -0.000022 | H | -7.402545 | -0.101839 | 0.886767  |
| H | 3.659539  | -2.792611 | -0.000030 | C | 1.386763  | 5.962191  | 0.000058  |
| C | 0.546648  | -5.430134 | -0.000087 | H | 1.938768  | 5.633676  | 0.888103  |
| H | 0.970676  | -6.431242 | -0.000114 | H | 1.384306  | 7.058067  | 0.000046  |
| C | 1.391252  | -4.327628 | -0.000079 | H | 1.938772  | 5.633650  | -0.887976 |
| H | 2.464667  | -4.489394 | -0.000102 | B | -1.176987 | -1.405051 | 0.000009  |
| C | -1.538416 | 1.875503  | 0.000018  | C | -0.769545 | 5.989198  | 1.262260  |
| H | -2.524530 | 1.427755  | 0.000028  | H | -1.821886 | 5.689498  | 1.303814  |
| C | -0.843035 | -5.256746 | -0.000059 | H | -0.734604 | 7.085645  | 1.273586  |
| H | -1.502218 | -6.120717 | -0.000065 | H | -0.282503 | 5.623843  | 2.173591  |
| C | -5.554587 | -0.806053 | -0.000032 | C | -0.769564 | 5.989287  | -1.262089 |
| C | -4.840037 | -0.896550 | -1.198194 | H | -0.282556 | 5.623975  | -2.173455 |
| H | -5.375672 | -0.823983 | -2.143444 | H | -0.734591 | 7.085734  | -1.273350 |
| C | 1.011495  | 3.094431  | 0.000032  | H | -1.821918 | 5.689631  | -1.303640 |
| H | 2.001713  | 3.536639  | 0.000035  | C | 5.460993  | -0.783776 | 0.000001  |
| C | -0.130939 | 3.901191  | 0.000026  | C | 5.922610  | -1.550321 | 1.262380  |

|   |          |           |           |   |          |           |           |
|---|----------|-----------|-----------|---|----------|-----------|-----------|
| C | 6.155196 | 0.591804  | 0.000065  | H | 5.896900 | 1.179771  | 0.888188  |
| C | 5.922604 | -1.550210 | -1.262450 | H | 5.896933 | 1.179839  | -0.888022 |
| H | 7.015561 | -1.644117 | -1.274409 | H | 7.015568 | -1.644224 | 1.274323  |
| H | 5.616401 | -1.023827 | -2.173665 | H | 5.502032 | -2.560474 | 1.304351  |
| H | 5.502017 | -2.560356 | -1.304505 | H | 5.616413 | -1.024021 | 2.173645  |
| H | 7.242522 | 0.455531  | 0.000078  |   |          |           |           |

**Table S12** Cartesian Coordinates for **1-S<sub>1</sub>** (first excited state)

|   |           |           |           |   |           |           |           |
|---|-----------|-----------|-----------|---|-----------|-----------|-----------|
| N | -0.227257 | -0.328238 | 0.020453  | C | -2.556481 | -0.642148 | -2.516040 |
| C | -0.582146 | -2.840643 | 0.051599  | H | -3.195222 | -0.519318 | -3.396946 |
| C | 1.116710  | -0.584533 | -0.000558 | H | -1.909637 | -1.512146 | -2.680903 |
| C | -2.763998 | -1.172746 | -0.033989 | H | -1.898698 | 0.235546  | -2.461899 |
| C | -0.364841 | 1.071410  | 0.049075  | C | -1.334585 | 3.257642  | 0.146261  |
| C | 1.885748  | 0.645219  | -0.009886 | H | -2.233787 | 3.863383  | 0.199212  |
| C | 1.719601  | -1.871633 | 0.000502  | C | -2.994489 | -1.700804 | 2.450576  |
| C | -1.389053 | -4.022181 | 0.066710  | H | -2.138549 | -1.068673 | 2.716443  |
| H | -2.470203 | -3.903107 | 0.059385  | H | -2.628554 | -2.734682 | 2.439236  |
| C | 0.856020  | -3.048139 | 0.038427  | H | -3.737317 | -1.617744 | 3.251156  |
| C | -3.380830 | -0.800363 | -1.255206 | C | -0.005048 | 5.442531  | 0.140726  |
| C | 3.298889  | 0.596129  | -0.037034 | C | -7.066654 | -0.480612 | -0.262295 |
| H | 3.868191  | 1.516443  | -0.044472 | H | -7.595232 | -1.411929 | -0.507802 |
| C | 0.932491  | 1.686125  | 0.021791  | H | -7.322380 | 0.248799  | -1.038620 |
| C | -3.586293 | -1.306897 | 1.112165  | H | -7.472426 | -0.121700 | 0.689875  |
| C | 3.917529  | -0.643516 | -0.051589 | C | 1.443444  | 5.963552  | 0.092811  |
| C | 3.112673  | -1.846300 | -0.031285 | H | 2.030402  | 5.616580  | 0.950948  |
| H | 3.641645  | -2.791777 | -0.038756 | H | 1.439718  | 7.058686  | 0.116487  |
| C | 0.554740  | -5.470428 | 0.082290  | H | 1.958179  | 5.654493  | -0.824171 |
| H | 0.984360  | -6.467975 | 0.096479  | B | -1.210852 | -1.465913 | 0.027814  |
| C | 1.379885  | -4.354051 | 0.054787  | C | -0.662132 | 5.958181  | 1.443693  |
| H | 2.456581  | -4.505228 | 0.047130  | H | -1.710928 | 5.652881  | 1.523491  |
| C | -1.500229 | 1.863970  | 0.120328  | H | -0.632302 | 7.053813  | 1.473485  |
| H | -2.492443 | 1.432488  | 0.158212  | H | -0.133141 | 5.579173  | 2.325625  |
| C | -0.851720 | -5.292497 | 0.086598  | C | -0.766086 | 6.014743  | -1.079466 |
| H | -1.506383 | -6.161044 | 0.101716  | H | -0.312933 | 5.675457  | -2.017996 |
| C | -5.573630 | -0.701470 | -0.179572 | H | -0.735443 | 7.110646  | -1.063292 |
| C | -4.760428 | -0.571278 | -1.310190 | H | -1.818859 | 5.712659  | -1.085613 |
| H | -5.212809 | -0.288869 | -2.259863 | C | 5.441847  | -0.803058 | -0.085559 |
| C | 1.060089  | 3.099598  | 0.047182  | C | 5.905075  | -1.584740 | 1.170474  |
| H | 2.054119  | 3.531145  | 0.020759  | C | 6.174089  | 0.551627  | -0.104962 |
| C | -0.068252 | 3.905852  | 0.108828  | C | 5.846949  | -1.589509 | -1.358583 |
| C | -4.963302 | -1.067634 | 1.024327  | H | 6.935838  | -1.713952 | -1.385085 |
| H | -5.575185 | -1.165122 | 1.920048  | H | 5.543072  | -1.051280 | -2.263354 |

|   |          |           |           |   |          |           |          |
|---|----------|-----------|-----------|---|----------|-----------|----------|
| H | 5.397437 | -2.586923 | -1.391896 | H | 6.994166 | -1.708252 | 1.147848 |
| H | 7.255734 | 0.381578  | -0.130969 | H | 5.458507 | -2.582361 | 1.227632 |
| H | 5.953578 | 1.146497  | 0.788338  | H | 5.642167 | -1.043575 | 2.086260 |
| H | 5.910299 | 1.144242  | -0.987984 |   |          |           |          |

**Table S13** Cartesian Coordinates for C-1-S<sub>0</sub> (ground state)

|   |           |           |           |   |           |           |           |
|---|-----------|-----------|-----------|---|-----------|-----------|-----------|
| C | -3.670090 | 1.748045  | -3.075971 | C | 2.173450  | -5.169722 | -2.293523 |
| C | -4.134407 | 3.177932  | -2.832327 | H | -4.534909 | 3.266557  | -1.797671 |
| C | -4.846724 | 0.796602  | -2.903296 | H | -4.932231 | 3.438032  | -3.563486 |
| C | -3.121240 | 1.626987  | -4.491470 | H | -3.275203 | 3.874117  | -2.958280 |
| C | 0.773262  | -4.932691 | -1.743234 | H | -5.247039 | 0.885851  | -1.868622 |
| C | -0.237342 | -5.001787 | -2.880527 | H | -5.644361 | 1.057325  | -3.634437 |
| C | 0.445623  | -6.000948 | -0.708339 | H | -4.508451 | -0.248725 | -3.081150 |
| C | -2.188240 | 2.349147  | -1.150480 | H | -3.713580 | 0.872219  | -5.055587 |
| C | -2.596900 | 1.396820  | -2.093163 | H | -2.055765 | 1.307952  | -4.449651 |
| C | -2.018954 | 0.122438  | -2.131894 | H | -3.192986 | 2.612694  | -5.003333 |
| C | -1.022163 | -0.172277 | -1.202471 | H | -1.260523 | -4.827926 | -2.478479 |
| C | -0.611945 | 0.787967  | -0.253557 | H | -0.190755 | -6.006571 | -3.356981 |
| C | -1.188308 | 2.056223  | -0.216607 | H | 0.001213  | -4.221445 | -3.637446 |
| C | -0.242046 | -1.391743 | -0.991907 | H | -0.577737 | -5.826825 | -0.306861 |
| C | 0.628057  | -1.136482 | 0.089295  | H | 0.492031  | -7.005470 | -1.185362 |
| C | 0.435598  | 0.197004  | 0.577378  | H | 1.183644  | -5.951312 | 0.123305  |
| C | -0.207731 | -2.630960 | -1.604294 | H | -2.660736 | 3.342480  | -1.144365 |
| C | 0.711694  | -3.581655 | -1.101424 | H | -2.341349 | -0.623776 | -2.872992 |
| C | 1.561318  | -3.309010 | -0.032713 | H | -0.867144 | 2.803760  | 0.523692  |
| C | 1.543978  | -2.045141 | 0.611061  | H | -0.869811 | -2.868606 | -2.449973 |
| C | 1.182052  | 0.646644  | 1.624916  | H | 2.256845  | -4.085751 | 0.317880  |
| C | 1.021867  | 1.886749  | 2.098253  | H | 3.469590  | -3.419578 | 1.993678  |
| C | 2.343428  | -1.571600 | 1.730312  | H | 4.811088  | -2.580434 | 3.895109  |
| C | 3.312441  | -2.393617 | 2.357967  | H | 4.473465  | -0.244748 | 4.745431  |
| C | 4.064092  | -1.926249 | 3.421781  | H | 2.791593  | 1.229344  | 3.681553  |
| C | 3.874948  | -0.614852 | 3.899972  | H | 2.820155  | 4.704606  | 2.787676  |
| C | 2.935397  | 0.206094  | 3.304355  | H | -1.409603 | 3.970372  | 3.279898  |
| C | 2.154610  | -0.253819 | 2.213428  | H | 4.169106  | 2.311031  | 2.666936  |
| C | 2.120716  | 2.738859  | 2.207482  | H | 3.866907  | 2.916028  | 0.979326  |
| C | 1.953578  | 4.032590  | 2.701424  | H | 3.411949  | 1.215471  | 1.430221  |
| C | 0.687623  | 4.474149  | 3.085979  | H | 0.100968  | 5.814817  | 4.650742  |
| C | -0.411229 | 3.622093  | 2.976667  | H | -0.199981 | 6.419903  | 2.962941  |
| C | -0.244088 | 2.328308  | 2.482808  | H | 1.490754  | 6.385492  | 3.628085  |
| C | 3.479384  | 2.264963  | 1.794623  | H | -1.253554 | 0.507738  | 2.989307  |
| C | 0.508290  | 5.862625  | 3.616057  | H | -1.555115 | 1.113577  | 1.301886  |
| C | -1.423408 | 1.413727  | 2.365527  | H | -2.338449 | 1.940334  | 2.717882  |

|   |          |           |           |   |          |           |           |
|---|----------|-----------|-----------|---|----------|-----------|-----------|
| H | 2.117493 | -5.335727 | -3.392650 | H | 2.616966 | -6.066162 | -1.805201 |
| H | 2.808922 | -4.280055 | -2.085107 |   |          |           |           |

**Table S14** Cartesian Coordinates for **2-S<sub>0</sub>** (ground state)

|   |           |           |           |   |           |           |           |
|---|-----------|-----------|-----------|---|-----------|-----------|-----------|
| N | 1.609564  | -0.150797 | 0.033904  | H | 4.846382  | -3.489025 | 0.381974  |
| C | -0.852418 | 0.410969  | -0.051547 | C | -0.054433 | -2.472399 | -2.285602 |
| C | 1.843919  | 1.223768  | -0.097791 | H | 0.950587  | -2.064105 | -2.452052 |
| C | -0.036809 | -2.204865 | 0.242620  | H | -0.765858 | -1.656921 | -2.466032 |
| C | 2.889419  | -0.765785 | 0.105157  | H | -0.229532 | -3.240998 | -3.045214 |
| C | 3.218925  | 1.506530  | -0.111408 | C | 7.086146  | -1.932778 | 0.251632  |
| C | 0.859013  | 2.211705  | -0.201382 | C | -0.984345 | -6.423909 | 0.714672  |
| C | -2.203276 | 0.016451  | -0.024273 | H | -2.072423 | -6.574841 | 0.717452  |
| H | -2.438992 | -1.037823 | 0.083545  | H | -0.599415 | -6.826116 | 1.658078  |
| C | -0.546430 | 1.798436  | -0.178798 | H | -0.576727 | -7.028330 | -0.103106 |
| C | -0.177670 | -2.771482 | 1.529549  | C | 8.069827  | -0.752345 | 0.141673  |
| C | 3.648100  | 2.828013  | -0.232774 | H | 7.953881  | -0.211547 | -0.804559 |
| H | 4.709725  | 3.046817  | -0.242993 | H | 9.099595  | -1.124754 | 0.184735  |
| C | 3.894534  | 0.223208  | 0.018481  | H | 7.942991  | -0.037668 | 0.962886  |
| C | -0.202146 | -3.036874 | -0.887760 | B | 0.270508  | -0.664916 | 0.074803  |
| C | 2.701598  | 3.861275  | -0.339132 | C | 7.371729  | -2.904595 | -0.918193 |
| C | 1.334380  | 3.530265  | -0.320570 | H | 6.732736  | -3.792808 | -0.876580 |
| H | 0.610697  | 4.334195  | -0.401496 | H | 8.414919  | -3.242893 | -0.888162 |
| C | -2.928556 | 2.301436  | -0.265173 | H | 7.200409  | -2.415423 | -1.883901 |
| H | -3.727838 | 3.030093  | -0.358602 | C | 7.352910  | -2.655411 | 1.593654  |
| C | -1.607619 | 2.717975  | -0.278919 | H | 7.167907  | -1.986323 | 2.441781  |
| H | -1.403329 | 3.778813  | -0.386309 | H | 8.395902  | -2.991561 | 1.646241  |
| C | 3.232211  | -2.110768 | 0.236575  | H | 6.713044  | -3.535279 | 1.717676  |
| H | 2.476068  | -2.883147 | 0.303144  | C | 3.113072  | 5.342131  | -0.474167 |
| C | -3.249366 | 0.935841  | -0.134169 | C | 2.560398  | 5.916029  | -1.800608 |
| C | -0.634373 | -4.962938 | 0.551462  | C | 4.642708  | 5.527436  | -0.478191 |
| C | -0.470299 | -4.132779 | 1.663964  | C | 2.538514  | 6.151159  | 0.713084  |
| H | -0.572687 | -4.555210 | 2.662323  | H | 2.821662  | 7.207697  | 0.628692  |
| C | 5.245437  | -0.134895 | 0.064073  | H | 2.921655  | 5.771428  | 1.667119  |
| H | 5.997802  | 0.643127  | -0.004621 | H | 1.445238  | 6.102207  | 0.750497  |
| C | 5.615732  | -1.477142 | 0.195755  | H | 4.884555  | 6.591764  | -0.576252 |
| C | -0.492427 | -4.394403 | -0.717806 | H | 5.115468  | 5.003483  | -1.316730 |
| H | -0.612847 | -5.023272 | -1.598486 | H | 5.099919  | 5.170000  | 0.451523  |
| C | 0.007382  | -1.920514 | 2.769058  | H | 2.844197  | 6.970202  | -1.908971 |
| H | -0.227229 | -2.484650 | 3.677466  | H | 1.467817  | 5.859803  | -1.846976 |
| H | -0.638005 | -1.033727 | 2.749968  | H | 2.958921  | 5.366279  | -2.660918 |
| H | 1.041091  | -1.562374 | 2.859744  | N | -4.604847 | 0.512549  | -0.123373 |
| C | 4.585654  | -2.439609 | 0.279467  | C | -5.573456 | 1.248961  | 0.610467  |

|   |           |           |           |   |           |           |           |
|---|-----------|-----------|-----------|---|-----------|-----------|-----------|
| C | -6.854898 | 1.471530  | 0.079534  | C | -5.875704 | -1.581805 | -0.276468 |
| C | -5.264159 | 1.768916  | 1.878196  | C | -4.494162 | -0.885623 | -2.136710 |
| C | -7.802370 | 2.189515  | 0.806317  | C | -6.259825 | -2.714006 | -0.992551 |
| H | -7.100613 | 1.079123  | -0.902047 | H | -6.257671 | -1.411296 | 0.725040  |
| C | -6.212877 | 2.501643  | 2.589038  | C | -4.869664 | -2.029899 | -2.837633 |
| H | -4.279934 | 1.593240  | 2.300627  | H | -3.816335 | -0.166185 | -2.585223 |
| C | -7.488543 | 2.713727  | 2.062264  | C | -5.757451 | -2.948877 | -2.274051 |
| H | -8.788617 | 2.351556  | 0.379001  | H | -6.945376 | -3.423961 | -0.537105 |
| H | -5.955028 | 2.895675  | 3.568721  | H | -4.475767 | -2.194784 | -3.837173 |
| H | -8.227832 | 3.279008  | 2.622487  | H | -6.053280 | -3.836453 | -2.826038 |
| C | -4.990565 | -0.651670 | -0.844169 |   |           |           |           |

**Table S15** Cartesian Coordinates for 2-S<sub>1</sub> (first excited state)

|   |           |           |           |   |           |           |           |
|---|-----------|-----------|-----------|---|-----------|-----------|-----------|
| N | 1.600701  | -0.169612 | 0.033479  | C | 5.234468  | -0.145070 | 0.059683  |
| C | -0.855884 | 0.367623  | -0.048880 | H | 5.988214  | 0.632327  | -0.011400 |
| C | 1.828334  | 1.205174  | -0.103179 | C | 5.604607  | -1.483925 | 0.192018  |
| C | -0.069739 | -2.238293 | 0.256223  | C | -0.553542 | -4.440676 | -0.681788 |
| C | 2.865719  | -0.774461 | 0.104796  | H | -0.695268 | -5.073503 | -1.556920 |
| C | 3.207359  | 1.492747  | -0.117368 | C | 0.058002  | -1.962858 | 2.782160  |
| C | 0.834412  | 2.201291  | -0.212343 | H | -0.164426 | -2.522432 | 3.696957  |
| C | -2.230746 | 0.009529  | -0.029167 | H | -0.565343 | -1.061017 | 2.772491  |
| H | -2.496039 | -1.037775 | 0.088820  | H | 1.100447  | -1.624334 | 2.844905  |
| C | -0.554827 | 1.791771  | -0.186117 | C | 4.570157  | -2.452460 | 0.277830  |
| C | -0.171251 | -2.809884 | 1.547037  | H | 4.832477  | -3.501790 | 0.380432  |
| C | 3.639970  | 2.827847  | -0.243888 | C | -0.153790 | -2.531227 | -2.270009 |
| H | 4.701828  | 3.045190  | -0.254759 | H | 0.839390  | -2.102393 | -2.453677 |
| C | 3.879150  | 0.221383  | 0.014742  | H | -0.880200 | -1.729037 | -2.447139 |
| C | -0.266924 | -3.081866 | -0.862791 | H | -0.323785 | -3.312820 | -3.018175 |
| C | 2.691988  | 3.854073  | -0.353465 | C | 7.074435  | -1.941919 | 0.247449  |
| C | 1.320156  | 3.528214  | -0.336734 | C | -1.002151 | -6.468663 | 0.770957  |
| H | 0.599905  | 4.334420  | -0.422365 | H | -2.088892 | -6.621919 | 0.823125  |
| C | -2.942848 | 2.342098  | -0.255883 | H | -0.575548 | -6.870730 | 1.696398  |
| H | -3.741406 | 3.065543  | -0.374953 | H | -0.631880 | -7.072374 | -0.064893 |
| C | -1.614722 | 2.721563  | -0.291956 | C | 8.060860  | -0.763945 | 0.135214  |
| H | -1.389726 | 3.776655  | -0.417880 | H | 7.943893  | -0.223729 | -0.811241 |
| C | 3.219483  | -2.122503 | 0.236409  | H | 9.090027  | -1.138689 | 0.178120  |
| H | 2.464057  | -2.896455 | 0.303605  | H | 7.934552  | -0.047467 | 0.954945  |
| C | -3.241122 | 0.948796  | -0.133788 | B | 0.228900  | -0.688996 | 0.075562  |
| C | -0.659361 | -5.006984 | 0.592581  | C | 7.360445  | -2.917017 | -0.919919 |
| C | -0.461078 | -4.171806 | 1.696559  | H | 6.717807  | -3.802775 | -0.877938 |
| H | -0.531183 | -4.591700 | 2.699161  | H | 8.402616  | -3.258878 | -0.887225 |



|   |           |           |           |   |           |           |           |
|---|-----------|-----------|-----------|---|-----------|-----------|-----------|
| H | 7.193768  | -2.427632 | -1.886720 | C | -5.065310 | 1.675826  | 1.972315  |
| C | 7.343628  | -2.664436 | 1.589404  | C | -7.738962 | 2.017521  | 1.203200  |
| H | 7.165247  | -1.992360 | 2.437045  | H | -7.201262 | 1.016955  | -0.622816 |
| H | 8.385491  | -3.005208 | 1.639177  | C | -5.955198 | 2.328843  | 2.815471  |
| H | 6.699686  | -3.541124 | 1.716234  | H | -4.036268 | 1.514321  | 2.269559  |
| C | 3.103278  | 5.335593  | -0.492373 | C | -7.291681 | 2.503249  | 2.438879  |
| C | 2.552131  | 5.907915  | -1.820288 | H | -8.769683 | 2.169369  | 0.898862  |
| C | 4.632547  | 5.524718  | -0.494999 | H | -5.607700 | 2.696753  | 3.775705  |
| C | 2.526471  | 6.149573  | 0.690645  | H | -7.980213 | 3.018787  | 3.100916  |
| H | 2.808781  | 7.206315  | 0.602491  | C | -5.018001 | -0.514262 | -0.972871 |
| H | 2.911053  | 5.774160  | 1.646272  | C | -5.981353 | -1.452286 | -0.541352 |
| H | 1.433345  | 6.097651  | 0.726799  | C | -4.440318 | -0.641637 | -2.255018 |
| H | 4.872221  | 6.589602  | -0.595500 | C | -6.360276 | -2.488198 | -1.386101 |
| H | 5.106580  | 4.997682  | -1.330821 | H | -6.390681 | -1.381734 | 0.459963  |
| H | 5.088528  | 5.168536  | 0.435742  | C | -4.838191 | -1.677104 | -3.089516 |
| H | 2.834323  | 6.962744  | -1.929290 | H | -3.712638 | 0.089378  | -2.586751 |
| H | 1.459882  | 5.847767  | -1.868212 | C | -5.796193 | -2.605133 | -2.661328 |
| H | 2.955592  | 5.358349  | -2.678961 | H | -7.086246 | -3.218223 | -1.042262 |
| N | -4.611156 | 0.531270  | -0.125989 | H | -4.405967 | -1.758894 | -4.081735 |
| C | -5.517227 | 1.173459  | 0.731236  | H | -6.096417 | -3.417364 | -3.315794 |
| C | -6.865280 | 1.358343  | 0.349558  |   |           |           |           |

**Table S16** Cartesian Coordinates for **12-S<sub>0</sub>** (ground state)

|   |           |           |           |   |           |           |           |
|---|-----------|-----------|-----------|---|-----------|-----------|-----------|
| N | -3.415944 | -0.330798 | 0.009462  | C | -4.677962 | 3.074370  | -0.080589 |
| C | 1.189706  | -0.924571 | -1.175270 | H | -5.669394 | 3.519002  | -0.093720 |
| H | 1.725640  | -0.910267 | -2.121171 | C | -6.795748 | -1.866956 | 0.043956  |
| C | 1.908981  | -0.798756 | 0.022427  | H | -7.296492 | -2.825974 | 0.067741  |
| C | -4.513450 | -3.032149 | 0.078208  | C | 3.379095  | -0.606466 | 0.017416  |
| C | -5.533960 | 0.606845  | -0.017856 | C | -7.574952 | -0.702193 | 0.012429  |
| C | -5.384678 | -1.852082 | 0.046067  | C | -4.555823 | 1.686611  | -0.044357 |
| C | -4.792146 | -0.588683 | 0.014297  | C | -6.922361 | 0.547541  | -0.018671 |
| C | -3.275110 | 1.084177  | -0.026811 | H | -7.501587 | 1.466100  | -0.043439 |
| C | -5.025864 | -4.343044 | 0.112469  | C | 1.189705  | -0.863347 | 1.224948  |
| H | -6.098445 | -4.509860 | 0.115917  | H | 1.717749  | -0.741098 | 2.167504  |
| C | -2.127685 | 1.869746  | -0.045068 | C | -3.099639 | -2.834965 | 0.074491  |
| H | -1.139080 | 1.427763  | -0.031766 | C | -4.176411 | -5.441103 | 0.142408  |
| C | -0.195690 | -1.106121 | -1.186145 | H | -4.596011 | -6.443732 | 0.168579  |
| C | -0.910552 | -1.167935 | 0.031837  | C | 5.391759  | 0.348808  | -0.981790 |
| C | -2.278801 | 3.259186  | -0.081412 | H | 5.850660  | 0.963669  | -1.749488 |
| H | -1.376186 | 3.859069  | -0.095243 | C | -0.195367 | -1.046367 | 1.245126  |

|   |           |           |           |   |           |           |           |
|---|-----------|-----------|-----------|---|-----------|-----------|-----------|
| C | -3.536578 | 3.890429  | -0.100066 | C | -4.478176 | 5.893370  | 1.108965  |
| C | 4.014407  | 0.157825  | -0.976856 | C | -4.475980 | 5.827178  | -1.414076 |
| H | 3.414064  | 0.646372  | -1.739306 | C | -2.340869 | 6.155646  | -0.158470 |
| C | -2.267673 | -3.974559 | 0.105533  | H | -4.605957 | 6.982831  | 1.092419  |
| H | -1.190345 | -3.830992 | 0.102910  | H | -3.944220 | 5.627416  | 2.028375  |
| C | 4.196510  | -1.180438 | 1.006722  | H | -5.474752 | 5.442307  | 1.160115  |
| H | 3.747525  | -1.806836 | 1.772485  | H | -2.508159 | 7.238305  | -0.187332 |
| C | 6.197971  | -0.237090 | 0.007772  | H | -1.744727 | 5.890572  | -1.039031 |
| C | -2.787219 | -5.261906 | 0.139052  | H | -1.746398 | 5.937622  | 0.736006  |
| H | -2.124383 | -6.122731 | 0.162488  | H | -4.604198 | 6.915957  | -1.454692 |
| C | -0.922110 | -1.229792 | -2.509641 | H | -5.472312 | 5.373615  | -1.443522 |
| H | -1.610024 | -0.389223 | -2.668061 | H | -3.940170 | 5.513820  | -2.317336 |
| H | -1.521479 | -2.147110 | -2.557411 | N | 7.605278  | -0.052628 | 0.003161  |
| H | -0.219956 | -1.244849 | -3.349316 | C | 8.299394  | 0.162084  | 1.225591  |
| C | 5.576566  | -1.010098 | 1.002143  | C | 7.767513  | 1.012676  | 2.208428  |
| H | 6.183557  | -1.485483 | 1.766062  | C | 9.528427  | -0.472522 | 1.468532  |
| C | -9.116781 | -0.743288 | 0.010547  | C | 8.447760  | 1.213049  | 3.408038  |
| C | -0.923893 | -1.086164 | 2.572670  | H | 6.821690  | 1.512493  | 2.025150  |
| H | -0.222916 | -1.051361 | 3.412737  | C | 10.209981 | -0.251425 | 2.663770  |
| H | -1.524769 | -1.998091 | 2.675089  | H | 9.942904  | -1.136503 | 0.716640  |
| H | -1.610626 | -0.236549 | 2.678895  | C | 9.674092  | 0.587608  | 3.643104  |
| C | -3.695917 | 5.422802  | -0.140400 | H | 8.020938  | 1.875060  | 4.157084  |
| C | -9.672185 | -2.179857 | 0.046332  | H | 11.159964 | -0.751335 | 2.834414  |
| H | 10.767618 | -2.150580 | 0.043563  | H | 10.204819 | 0.751858  | 4.576561  |
| H | -9.359776 | -2.716770 | 0.949298  | C | 8.323534  | -0.081228 | -1.223799 |
| H | -9.356541 | -2.762212 | -0.826858 | C | 9.346265  | 0.848415  | -1.473026 |
| B | -2.471750 | -1.410612 | 0.037824  | C | 8.022355  | -1.039890 | -2.204952 |
| C | -9.653963 | 0.006646  | 1.252983  | C | 10.054173 | 0.810464  | -2.672776 |
| H | 10.750842 | -0.006435 | 1.262930  | H | 9.580583  | 1.596592  | -0.722483 |
| H | -9.334264 | 1.053868  | 1.268373  | C | 8.723639  | -1.058102 | -3.409044 |
| H | -9.299650 | -0.463592 | 2.177372  | H | 7.238385  | -1.766525 | -2.016891 |
| C | -9.649099 | -0.058055 | -1.270735 | C | 9.746125  | -0.138006 | -3.650402 |
| H | -9.291490 | -0.575155 | -2.168447 | H | 10.842389 | 1.538084  | -2.848244 |
| H | -9.328927 | 0.986941  | -1.338642 | H | 8.476907  | -1.807573 | -4.156649 |
| H | 10.745939 | -0.071430 | -1.284119 | H | 10.295367 | -0.159905 | -4.587335 |

**Table S17** Cartesian Coordinates for **12-S<sub>1</sub>** (first excited state)

|   |           |           |           |   |           |           |           |
|---|-----------|-----------|-----------|---|-----------|-----------|-----------|
| N | 3.418999  | -0.320703 | -0.082018 | H | -1.611587 | -0.189641 | 2.034454  |
| C | -1.140144 | -0.511388 | 1.110564  | C | -1.939492 | -0.791760 | -0.020950 |

|   |           |           |           |   |            |           |           |
|---|-----------|-----------|-----------|---|------------|-----------|-----------|
| C | 4.498211  | -3.029398 | 0.107136  | C | -5.611610  | -1.113092 | -0.871302 |
| C | 5.546792  | 0.603969  | 0.010541  | H | -6.240134  | -1.689972 | -1.539092 |
| C | 5.371439  | -1.864976 | 0.125145  | C | 9.115778   | -0.769719 | 0.336492  |
| C | 4.792689  | -0.587987 | 0.025895  | C | 0.730913   | -1.925474 | -2.508834 |
| C | 3.296127  | 1.071223  | -0.192984 | H | 0.007263   | -1.933706 | -3.330591 |
| C | 5.002881  | -4.345245 | 0.198475  | H | 1.132288   | -2.939572 | -2.400623 |
| H | 6.075833  | -4.501960 | 0.277313  | H | 1.572334   | -1.284943 | -2.796741 |
| C | 2.164906  | 1.873168  | -0.369168 | C | 3.763551   | 5.414456  | -0.477579 |
| H | 1.174319  | 1.439114  | -0.443574 | C | 9.654592   | -2.208654 | 0.454205  |
| C | 0.237525  | -0.696178 | 1.096650  | H | 10.747996  | -2.187235 | 0.531998  |
| C | 0.893228  | -1.168582 | -0.077482 | H | 9.396453   | -2.813863 | -0.422217 |
| C | 2.325114  | 3.256115  | -0.458260 | H | 9.268694   | -2.717083 | 1.345077  |
| H | 1.433207  | 3.857539  | -0.594399 | B | 2.460397   | -1.433935 | -0.078323 |
| C | 4.715978  | 3.067515  | -0.220811 | C | 9.752208   | -0.127775 | -0.919418 |
| H | 5.708353  | 3.509548  | -0.168180 | H | 10.847504  | -0.154653 | -0.852899 |
| C | 6.788354  | -1.878354 | 0.228851  | H | 9.449771   | 0.917789  | -1.038673 |
| H | 7.281979  | -2.837496 | 0.313190  | H | 9.454119   | -0.667422 | -1.826184 |
| C | -3.385657 | -0.599697 | 0.006948  | C | 9.573907   | 0.010926  | 1.591582  |
| C | 7.575971  | -0.711206 | 0.224013  | H | 9.148490   | -0.429517 | 2.501165  |
| C | 4.590098  | 1.675298  | -0.129831 | H | 9.264037   | 1.060392  | 1.552540  |
| C | 6.949618  | 0.539459  | 0.110966  | H | 10.667534  | -0.012927 | 1.682340  |
| H | 7.534875  | 1.454413  | 0.096990  | C | 4.662119   | 5.764504  | -1.687769 |
| C | -1.285384 | -1.264451 | -1.180413 | C | 4.427642   | 5.944465  | 0.815731  |
| H | -1.860795 | -1.447163 | -2.083062 | C | 2.420824   | 6.149273  | -0.656133 |
| C | 3.060959  | -2.823659 | 0.000350  | H | 4.800409   | 6.850654  | -1.763332 |
| C | 4.171750  | -5.454397 | 0.190405  | H | 4.210997   | 5.413723  | -2.623481 |
| H | 4.593180  | -6.453879 | 0.260635  | H | 5.653449   | 5.307023  | -1.602857 |
| C | -5.365237 | 0.472594  | 0.966504  | H | 2.596515   | 7.229696  | -0.715721 |
| H | -5.795578 | 1.190139  | 1.654708  | H | 1.742720   | 5.970003  | 0.186161  |
| C | 0.093297  | -1.447106 | -1.222591 | H | 1.908897   | 5.845977  | -1.576636 |
| C | 3.591574  | 3.884557  | -0.382586 | H | 4.565563   | 7.031881  | 0.760314  |
| C | -4.001317 | 0.287821  | 0.931462  | H | 5.410626   | 5.491161  | 0.981872  |
| H | -3.384311 | 0.878489  | 1.598159  | H | 3.805937   | 5.725273  | 1.691862  |
| C | 2.245856  | -3.999861 | 0.014888  | N | -7.582782  | -0.040554 | 0.087268  |
| H | 1.165517  | -3.877807 | -0.037086 | C | -8.365177  | -0.205737 | -1.095180 |
| C | -4.246522 | -1.291358 | -0.888706 | C | -7.942015  | 0.373031  | -2.302566 |
| H | -3.831114 | -2.019714 | -1.575040 | C | -9.565976  | -0.930666 | -1.038380 |
| C | -6.208452 | -0.224216 | 0.061304  | C | -8.717000  | 0.214101  | -3.448449 |
| C | 2.767498  | -5.272951 | 0.097860  | H | -7.028633  | 0.957644  | -2.330674 |
| H | 2.106814  | -6.137396 | 0.099529  | C | -10.330486 | -1.081828 | -2.191407 |
| C | 1.034277  | -0.406005 | 2.348170  | H | -9.880130  | -1.382221 | -0.103591 |
| H | 1.696976  | 0.455581  | 2.202841  | C | -9.909888  | -0.512558 | -3.397752 |
| H | 1.673648  | -1.256475 | 2.611959  | H | -8.393897  | 0.670397  | -4.378876 |
| H | 0.378753  | -0.187566 | 3.197248  | H | -11.252977 | -1.652446 | -2.149563 |

|   |            |           |           |   |            |           |          |
|---|------------|-----------|-----------|---|------------|-----------|----------|
| H | -10.511484 | -0.632143 | -4.293440 | C | -8.612220  | -0.006440 | 3.663716 |
| C | -8.250145  | 0.318186  | 1.296967  | H | -7.219393  | -1.159950 | 2.487834 |
| C | -9.220780  | 1.332229  | 1.280946  | C | -9.574625  | 1.007095  | 3.653456 |
| C | -7.948607  | -0.356804 | 2.490809  | H | -10.618026 | 2.464686  | 2.450153 |
| C | -9.875985  | 1.672459  | 2.460671  | H | -8.385529  | -0.535834 | 4.583854 |
| H | -9.440073  | 1.854939  | 0.356207  | H | -10.090640 | 1.275472  | 4.570085 |

**Table S18** Cartesian Coordinates for **13-S<sub>0</sub>** (ground state)

|   |           |           |           |   |           |           |           |
|---|-----------|-----------|-----------|---|-----------|-----------|-----------|
| N | -3.016524 | -0.369548 | 0.092018  | C | -3.399753 | 3.387631  | -1.797008 |
| C | -2.549848 | -2.585701 | 1.209982  | C | 1.647067  | -1.115965 | -0.756361 |
| C | -4.374321 | -0.685672 | 0.220299  | H | 2.202908  | -1.430842 | -1.634487 |
| C | -0.464929 | -0.956164 | 0.452450  | C | -0.537176 | 0.188919  | 2.721243  |
| C | -2.963196 | 0.901015  | -0.542622 | H | 0.144147  | 0.600052  | 3.472759  |
| C | -5.185287 | 0.333542  | -0.305287 | H | -1.100301 | -0.627766 | 3.189079  |
| C | -4.890141 | -1.853422 | 0.791555  | H | -1.261929 | 0.973179  | 2.466977  |
| C | -1.650468 | -3.550232 | 1.711844  | C | -2.101837 | 2.900006  | -1.528342 |
| H | -0.584353 | -3.351982 | 1.639391  | H | -1.240868 | 3.498093  | -1.812589 |
| C | -3.948153 | -2.852834 | 1.309993  | C | -0.411081 | -2.081425 | -1.826439 |
| C | 0.214954  | -0.284037 | 1.494095  | H | -1.148064 | -1.429908 | -2.313328 |
| C | -6.572395 | 0.197341  | -0.266237 | H | -0.949586 | -2.974018 | -1.484988 |
| H | -7.198489 | 0.984078  | -0.671427 | H | 0.308236  | -2.395919 | -2.589094 |
| C | -4.275360 | 1.357810  | -0.797925 | C | -3.569203 | 4.755557  | -2.484715 |
| C | 0.277004  | -1.375039 | -0.676251 | C | -5.049644 | 5.125696  | -2.695552 |
| C | -7.144891 | -0.955860 | 0.296932  | H | -5.564824 | 4.399321  | -3.334469 |
| C | -6.292961 | -1.950533 | 0.810421  | H | -5.119506 | 6.103527  | -3.185354 |
| H | -6.743080 | -2.837266 | 1.243238  | H | -5.592528 | 5.192933  | -1.745813 |
| C | -3.465343 | -4.983378 | 2.381118  | B | -2.007490 | -1.272664 | 0.568629  |
| H | -3.822988 | -5.906040 | 2.831442  | C | -2.880449 | 4.727134  | -3.870105 |
| C | -4.379851 | -4.056406 | 1.898216  | H | -1.809996 | 4.511118  | -3.789639 |
| H | -5.440175 | -4.273816 | 1.980862  | H | -2.987931 | 5.697559  | -4.370370 |
| C | -1.862951 | 1.674580  | -0.909521 | H | -3.327761 | 3.961146  | -4.513816 |
| H | -0.850138 | 1.339237  | -0.723322 | C | -2.919709 | 5.856834  | -1.613055 |
| C | -2.090299 | -4.733884 | 2.290196  | H | -3.395364 | 5.906687  | -0.626911 |
| H | -1.376269 | -5.460263 | 2.669044  | H | -3.027426 | 6.837404  | -2.093077 |
| C | 2.321029  | -0.456679 | 0.280819  | H | -1.850532 | 5.677816  | -1.458673 |
| C | 1.589072  | -0.049054 | 1.404199  | C | -8.671799 | -1.164461 | 0.369611  |
| H | 2.102210  | 0.453850  | 2.218417  | C | -9.059284 | -2.442092 | -0.412512 |
| C | -4.486553 | 2.592206  | -1.419947 | C | -9.453993 | 0.017420  | -0.234980 |
| H | -5.503514 | 2.920549  | -1.604450 | C | -9.105440 | -1.316561 | 1.847142  |

|   |            |           |           |   |          |           |           |
|---|------------|-----------|-----------|---|----------|-----------|-----------|
| H | -10.189989 | -1.467639 | 1.913699  | H | 3.607224 | 4.354733  | 0.620069  |
| H | -8.850793  | -0.420149 | 2.423985  | H | 6.899315 | 2.241653  | 2.406370  |
| H | -8.620846  | -2.171644 | 2.329934  | C | 5.889899 | 4.845081  | 2.068085  |
| H | -10.529954 | -0.176345 | -0.160200 | C | 4.852309 | 5.528402  | 2.990488  |
| H | -9.218560  | 0.163540  | -1.295363 | C | 7.204602 | 4.693762  | 2.856561  |
| H | -9.250609  | 0.955348  | 0.294279  | C | 6.163791 | 5.755085  | 0.846827  |
| H | -10.143438 | -2.603713 | -0.367842 | H | 3.902039 | 5.703407  | 2.475116  |
| H | -8.573413  | -3.334645 | -0.004657 | H | 4.644967 | 4.910451  | 3.871607  |
| H | -8.770967  | -2.358240 | -1.466547 | H | 5.227836 | 6.499515  | 3.336319  |
| N | 3.717610   | -0.209902 | 0.195278  | H | 7.995694 | 4.241285  | 2.247756  |
| C | 4.586386   | -1.203390 | -0.332760 | H | 7.558571 | 5.679983  | 3.177742  |
| C | 5.634813   | -0.854937 | -1.199359 | H | 7.072546 | 4.081445  | 3.755924  |
| C | 4.424054   | -2.555225 | -0.005067 | H | 6.549848 | 6.728765  | 1.173332  |
| C | 6.486961   | -1.830400 | -1.704925 | H | 6.905392 | 5.301551  | 0.179304  |
| H | 5.778050   | 0.185758  | -1.472990 | H | 5.255641 | 5.936288  | 0.262241  |
| C | 5.276144   | -3.524355 | -0.535157 | C | 7.296679 | -4.235709 | -1.986870 |
| H | 3.624248   | -2.849544 | 0.667233  | C | 6.964827 | -5.667503 | -1.525490 |
| C | 6.333047   | -3.192906 | -1.393768 | C | 7.213525 | -4.197021 | -3.531563 |
| H | 7.284756   | -1.515702 | -2.372554 | C | 8.744147 | -3.912172 | -1.545847 |
| H | 5.107382   | -4.557323 | -0.250690 | H | 7.035858 | -5.771893 | -0.436773 |
| C | 4.255035   | 1.020116  | 0.661759  | H | 5.958138 | -5.972322 | -1.833483 |
| C | 3.609703   | 2.237559  | 0.390927  | H | 7.674457 | -6.373462 | -1.971726 |
| C | 5.445500   | 1.055787  | 1.398609  | H | 7.477622 | -3.211399 | -3.929166 |
| C | 4.140005   | 3.436603  | 0.853449  | H | 7.902415 | -4.929204 | -3.970914 |
| H | 2.688975   | 2.237155  | -0.184028 | H | 6.200189 | -4.434677 | -3.874924 |
| C | 5.974619   | 2.268884  | 1.840162  | H | 9.445555 | -4.643039 | -1.967215 |
| H | 5.961280   | 0.128057  | 1.625891  | H | 9.058938 | -2.917865 | -1.879800 |
| C | 5.338317   | 3.491520  | 1.587116  | H | 8.836562 | -3.942204 | -0.454135 |

**Table S19** Cartesian Coordinates for **13-S<sub>1</sub>** (first excited state)

|   |          |           |           |   |           |           |           |
|---|----------|-----------|-----------|---|-----------|-----------|-----------|
| N | 3.011945 | -0.318552 | -0.125304 | C | 3.977020  | -2.705516 | -1.503816 |
| C | 2.544050 | -2.451294 | -1.399165 | C | -0.249117 | -0.230765 | -1.575033 |
| C | 4.376993 | -0.620960 | -0.259073 | C | 6.585051  | 0.239290  | 0.320255  |
| C | 0.455391 | -0.919393 | -0.546929 | H | 7.199863  | 0.999419  | 0.788132  |
| C | 2.943451 | 0.889192  | 0.582855  | C | 4.262722  | 1.338265  | 0.892277  |
| C | 5.176610 | 0.365741  | 0.349143  | C | -0.271322 | -1.372129 | 0.590876  |
| C | 4.901814 | -1.754163 | -0.911057 | C | 7.156391  | -0.867669 | -0.314232 |
| C | 1.675541 | -3.419760 | -1.998114 | C | 6.318390  | -1.836190 | -0.912710 |
| H | 0.600465 | -3.257890 | -1.933770 | H | 6.783358  | -2.686721 | -1.399338 |

|   |           |           |           |   |           |           |           |
|---|-----------|-----------|-----------|---|-----------|-----------|-----------|
| C | 3.539625  | -4.773682 | -2.740740 | H | 10.225747 | -1.262484 | -1.927808 |
| H | 3.916255  | -5.656513 | -3.250939 | H | 8.893680  | -0.177452 | -2.375102 |
| C | 4.420963  | -3.866531 | -2.176084 | H | 8.657979  | -1.931183 | -2.410974 |
| H | 5.487918  | -4.060307 | -2.256901 | H | 10.540638 | -0.122593 | 0.234329  |
| C | 1.837198  | 1.645619  | 0.987351  | H | 9.213516  | 0.135581  | 1.376364  |
| H | 0.824641  | 1.329804  | 0.761765  | H | 9.261867  | 1.038844  | -0.149996 |
| C | 2.140208  | -4.541658 | -2.647878 | H | 10.156553 | -2.556777 | 0.259008  |
| H | 1.442055  | -5.250132 | -3.088756 | H | 8.586877  | -3.258748 | -0.167019 |
| C | -2.325370 | -0.467058 | -0.336681 | H | 8.776113  | -2.388612 | 1.362490  |
| C | -1.615574 | -0.005577 | -1.464637 | N | -3.706041 | -0.243557 | -0.233563 |
| H | -2.153241 | 0.489079  | -2.266196 | C | -4.544073 | -1.204874 | 0.383470  |
| C | 4.446965  | 2.536551  | 1.604764  | C | -5.589439 | -0.794698 | 1.231106  |
| H | 5.459123  | 2.857755  | 1.829139  | C | -4.344985 | -2.574649 | 0.148726  |
| C | 3.353969  | 3.298812  | 2.016433  | C | -6.401559 | -1.744753 | 1.829923  |
| C | -1.639706 | -1.153344 | 0.687240  | H | -5.737694 | 0.259794  | 1.435981  |
| H | -2.182305 | -1.471801 | 1.570683  | C | -5.175726 | -3.510660 | 0.755368  |
| C | 0.483411  | 0.253837  | -2.805127 | H | -3.562327 | -2.898644 | -0.528216 |
| H | -0.194090 | 0.758807  | -3.500459 | C | -6.221461 | -3.126477 | 1.611217  |
| H | 0.963434  | -0.579287 | -3.328999 | H | -7.187982 | -1.400394 | 2.493309  |
| H | 1.278982  | 0.956933  | -2.532090 | H | -5.003183 | -4.557869 | 0.539760  |
| C | 2.053965  | 2.826164  | 1.690802  | C | -4.279114 | 0.946276  | -0.748424 |
| H | 1.185615  | 3.402129  | 1.998727  | C | -3.630721 | 2.181945  | -0.569115 |
| C | 0.448268  | -2.073280 | 1.719815  | C | -5.501938 | 0.903446  | -1.435811 |
| H | 1.185982  | -1.408693 | 2.184613  | C | -4.203131 | 3.338748  | -1.075273 |
| H | 0.996482  | -2.945880 | 1.348875  | H | -2.701473 | 2.228924  | -0.012181 |
| H | -0.249210 | -2.403266 | 2.495667  | C | -6.055077 | 2.075072  | -1.940712 |
| C | 3.502517  | 4.616322  | 2.801069  | H | -5.998203 | -0.047033 | -1.598050 |
| C | 4.976047  | 4.979749  | 3.065575  | C | -5.425833 | 3.321087  | -1.776640 |
| H | 5.484290  | 4.211490  | 3.659396  | H | -3.688565 | 4.279238  | -0.908455 |
| H | 5.030262  | 5.921173  | 3.624564  | H | -6.990347 | 2.003269  | -2.482176 |
| H | 5.535476  | 5.114894  | 2.132851  | C | -6.014780 | 4.630090  | -2.322799 |
| B | 2.014818  | -1.227962 | -0.692228 | C | -5.008498 | 5.265764  | -3.313081 |
| C | 2.789396  | 4.491108  | 4.168999  | C | -7.348508 | 4.409616  | -3.060976 |
| H | 1.722861  | 4.270609  | 4.053201  | C | -6.264834 | 5.605455  | -1.146388 |
| H | 2.877555  | 5.426638  | 4.735896  | H | -4.048631 | 5.489352  | -2.836237 |
| H | 3.234084  | 3.687818  | 4.768158  | H | -4.817778 | 4.599048  | -4.161616 |
| C | 2.862117  | 5.775739  | 2.000407  | H | -5.414087 | 6.206072  | -3.703737 |
| H | 3.358799  | 5.900771  | 1.031013  | H | -8.115397 | 3.985910  | -2.402730 |
| H | 2.951774  | 6.719914  | 2.552503  | H | -7.723714 | 5.370510  | -3.428568 |
| H | 1.797788  | 5.600334  | 1.810628  | H | -7.232449 | 3.747806  | -3.926643 |
| C | 8.685949  | -1.068733 | -0.384245 | H | -6.680866 | 6.546048  | -1.525165 |
| C | 9.071382  | -2.398703 | 0.306504  | H | -6.977835 | 5.182465  | -0.429640 |
| C | 9.463250  | 0.065423  | 0.311535  | H | -5.342435 | 5.842714  | -0.606491 |
| C | 9.139969  | -1.115166 | -1.862825 | C | -7.150711 | -4.137904 | 2.298095  |

|   |           |           |          |   |           |           |          |
|---|-----------|-----------|----------|---|-----------|-----------|----------|
| C | -6.804650 | -5.593784 | 1.933419 | H | -7.306749 | -2.972652 | 4.165519 |
| C | -7.028164 | -3.978112 | 3.833533 | H | -7.692101 | -4.691139 | 4.335557 |
| C | -8.611995 | -3.861351 | 1.867542 | H | -6.003296 | -4.173718 | 4.168469 |
| H | -6.901292 | -5.780308 | 0.857905 | H | -9.285541 | -4.573798 | 2.357466 |
| H | -5.787432 | -5.861889 | 2.240264 | H | -8.937258 | -2.852662 | 2.142427 |
| H | -7.493788 | -6.271120 | 2.448738 | H | -8.730204 | -3.971852 | 0.783653 |

## 6. References

[S1] Barbour LJ. X-Seed—A software tool for supramolecular crystallography. Elsevier; 2001.

[S2] Sheldrick G. SHELXS-97, program for crystal structure solution. University of Göttingen Germany; 1997.

[S3] Gaussian 16, Revision A.03, M. J. Frisch, G. W. Trucks, H. B. Schlegel, G. E. Scuseria, M. A. Robb, J. R. Cheeseman, G. Scalmani, V. Barone, G. A. Petersson, H. Nakatsuji, X. Li, M. Caricato, A. V. Marenich, J. Bloino, B. G. Janesko, R. Gomperts, B. Mennucci, H. P. Hratchian, J. V. Ortiz, A. F. Izmaylov, J. L. Sonnenberg, D. Williams-Young, F. Ding, F. Lipparini, F. Egidi, J. Goings, B. Peng, A. Petrone, T. Henderson, D. Ranasinghe, V. G. Zakrzewski, J. Gao, N. Rega, G. Zheng, W. Liang, M. Hada, M. Ehara, K. Toyota, R. Fukuda, J. Hasegawa, M. Ishida, T. Nakajima, Y. Honda, O. Kitao, H. Nakai, T. Vreven, K. Throssell, J. A. Montgomery, Jr., J. E. Peralta, F. Ogliaro, M. J. Bearpark, J. J. Heyd, E. N. Brothers, K. N. Kudin, V. N. Staroverov, T. A. Keith, R. Kobayashi, J. Normand, K. Raghavachari, A. P. Rendell, J. C. Burant, S. S. Iyengar, J. Tomasi, M. Cossi, J. M. Millam, M. Klene, C. Adamo, R. Cammi, J. W. Ochterski, R. L. Martin, K. Morokuma, O. Farkas, J. B. Foresman, and D. J. Fox, Gaussian, Inc., Wallingford CT, 2016.

## 7. NMR Spectra Collection

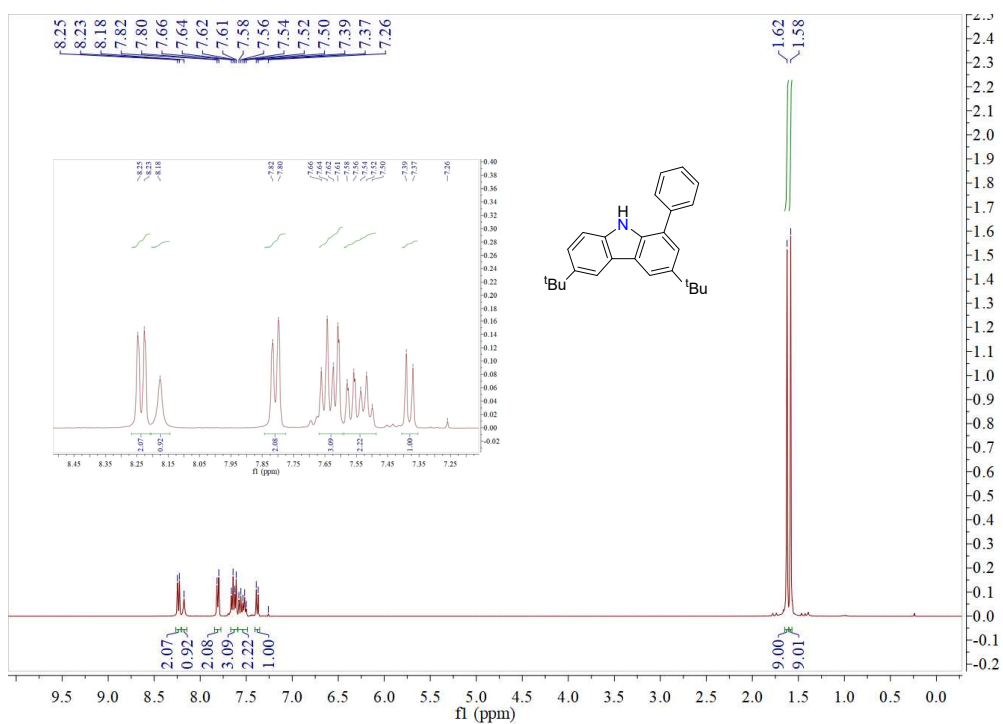

**Fig. S23**  $^1\text{H}$  NMR Spectra of **Cz1** (400 MHz,  $\text{CDCl}_3$ )

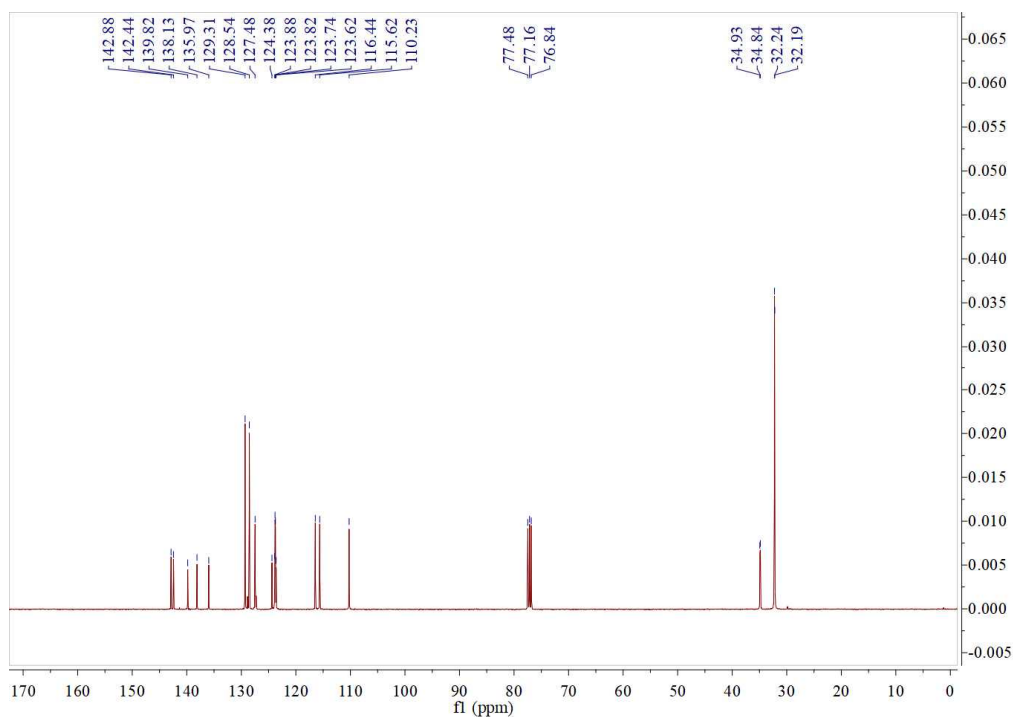

**Fig. S24**  $^{13}\text{C}$  NMR Spectra of **Cz1** (100 MHz,  $\text{CDCl}_3$ )



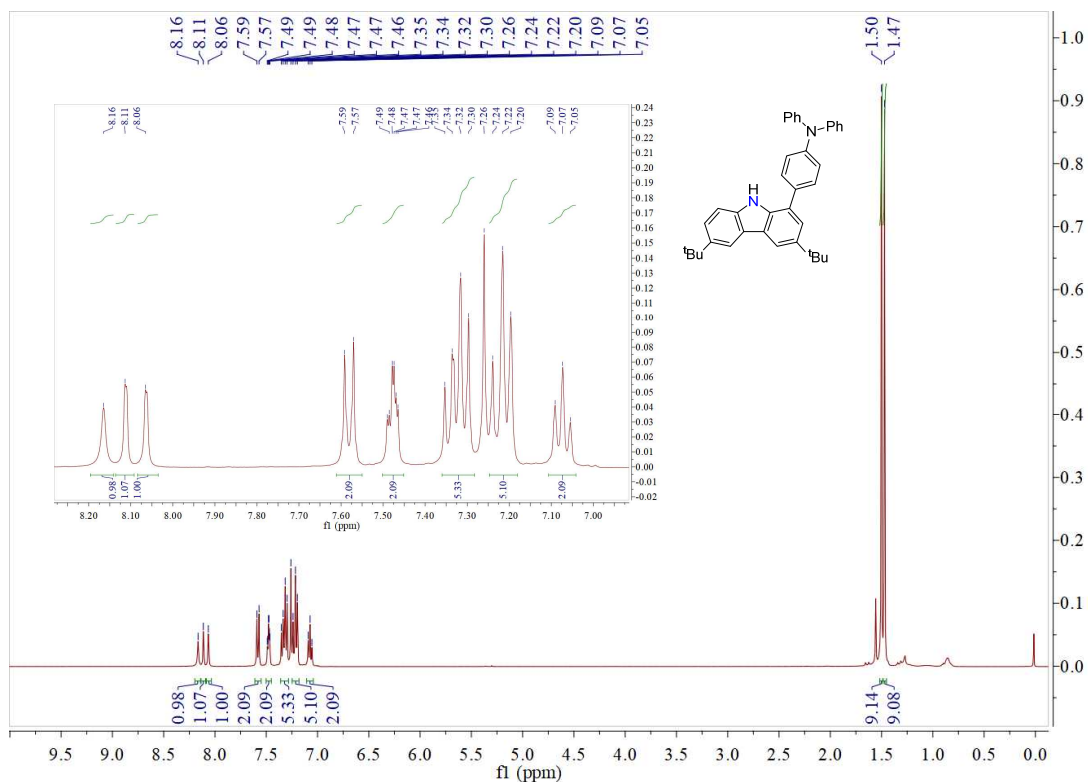

**Fig. S25** <sup>1</sup>H NMR Spectra of Cz2 (400 MHz, CDCl<sub>3</sub>)

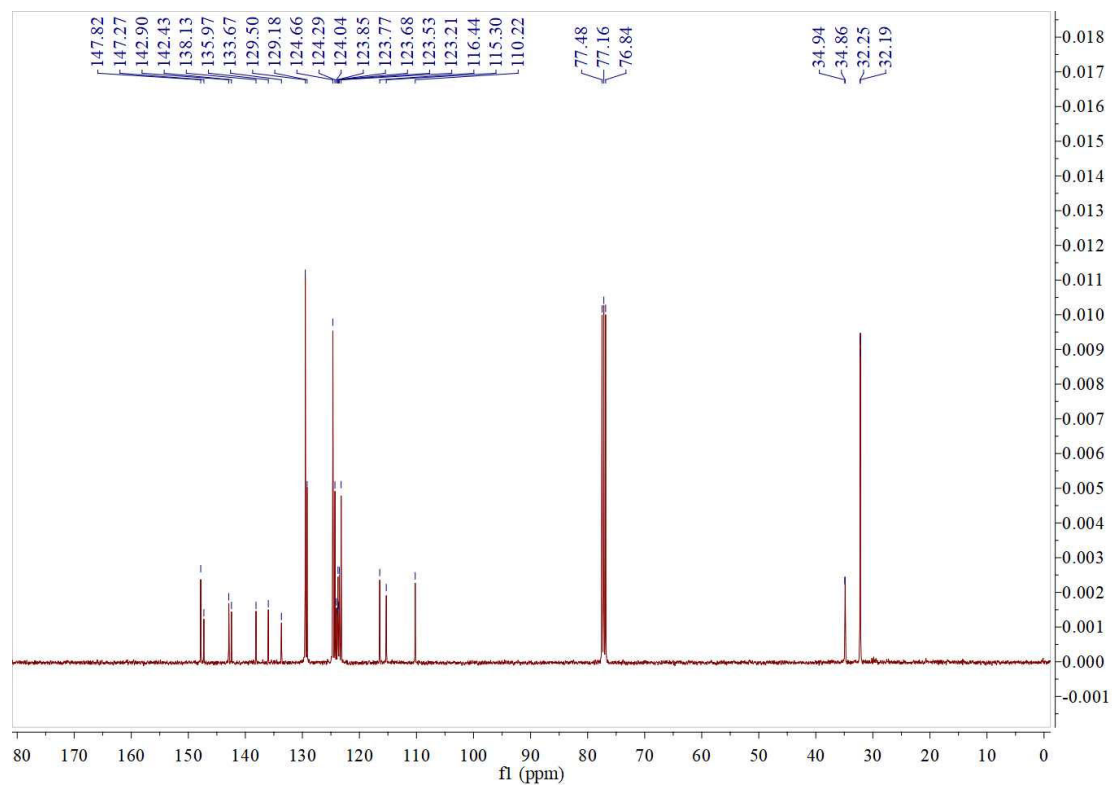

**Fig. S26** <sup>13</sup>C NMR Spectra of Cz2 (100 MHz, CDCl<sub>3</sub>)

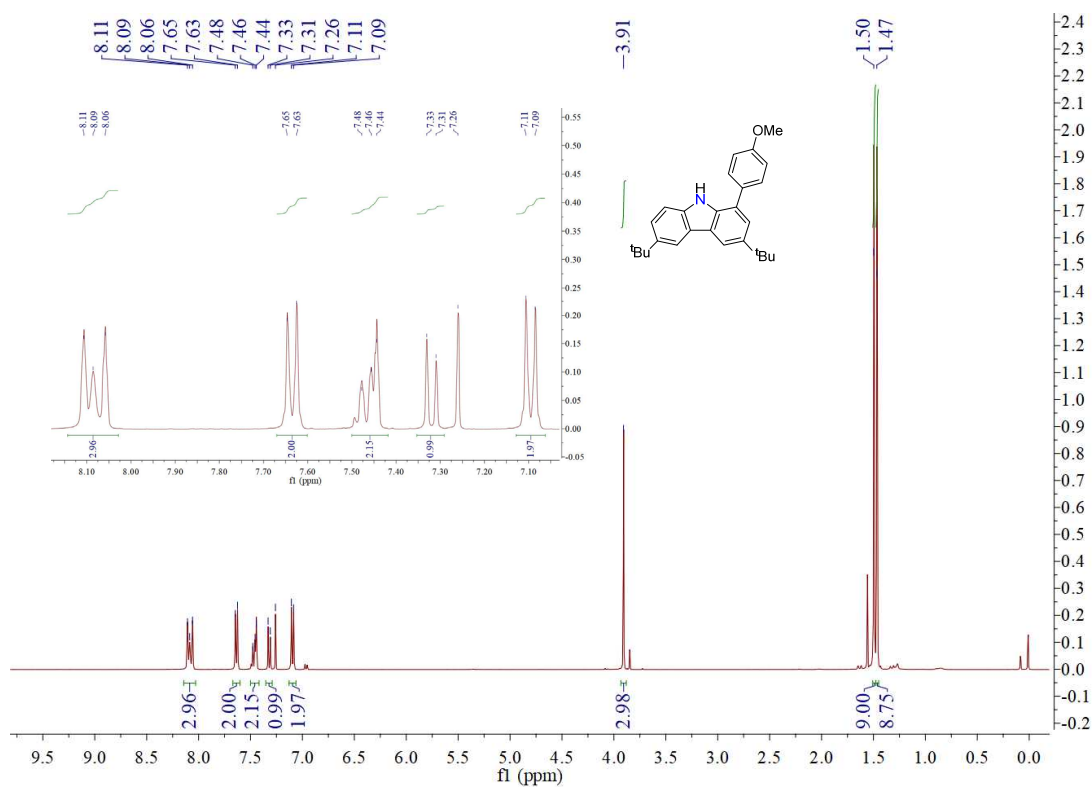

**Fig. S27** <sup>1</sup>H NMR Spectra of Cz3 (400 MHz, CDCl<sub>3</sub>)

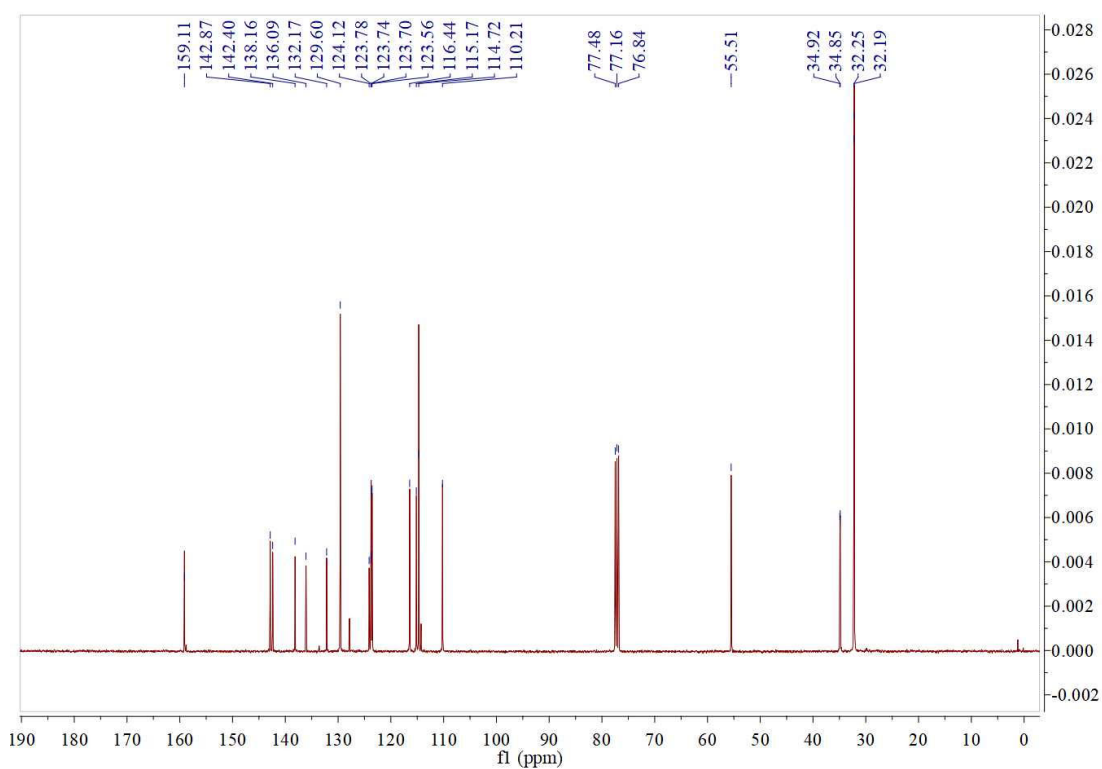

**Fig. S28** <sup>13</sup>C NMR Spectra of Cz3 (100 MHz, CDCl<sub>3</sub>)

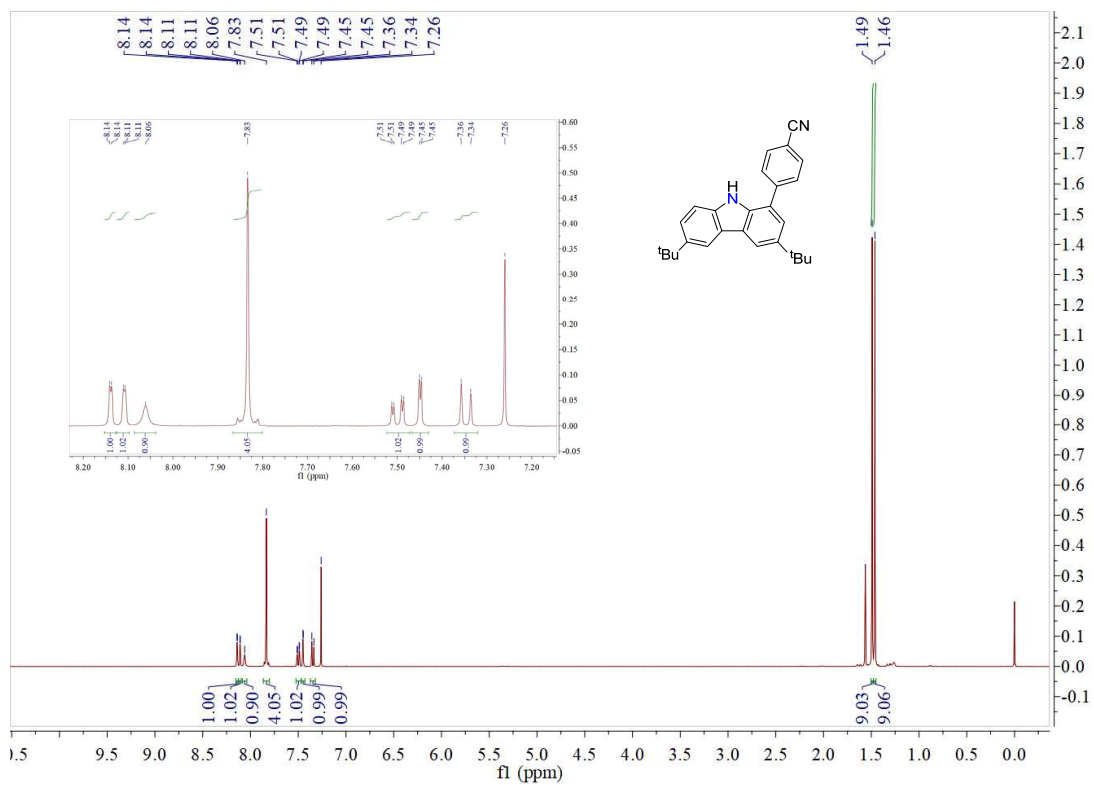

**Fig. S29** <sup>1</sup>H NMR Spectra of **Cz4** (400 MHz, CDCl<sub>3</sub>)

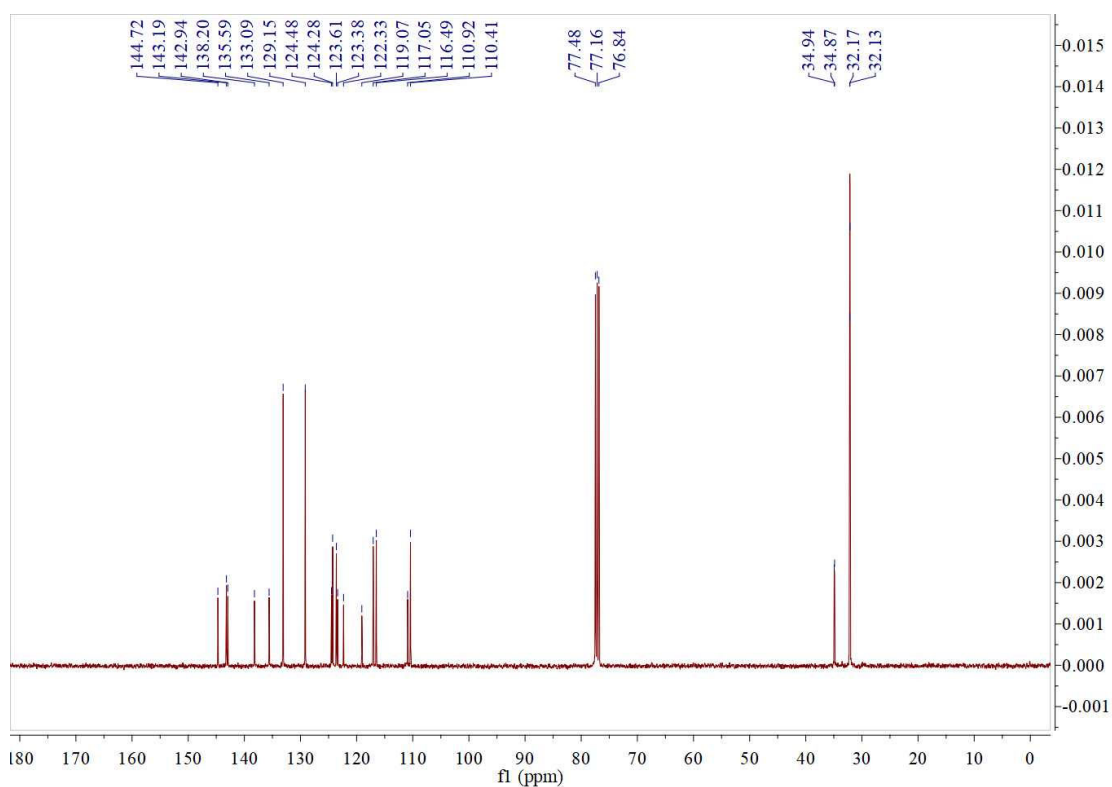

**Fig. S30** <sup>13</sup>C NMR Spectra of **Cz4** (100 MHz, CDCl<sub>3</sub>)

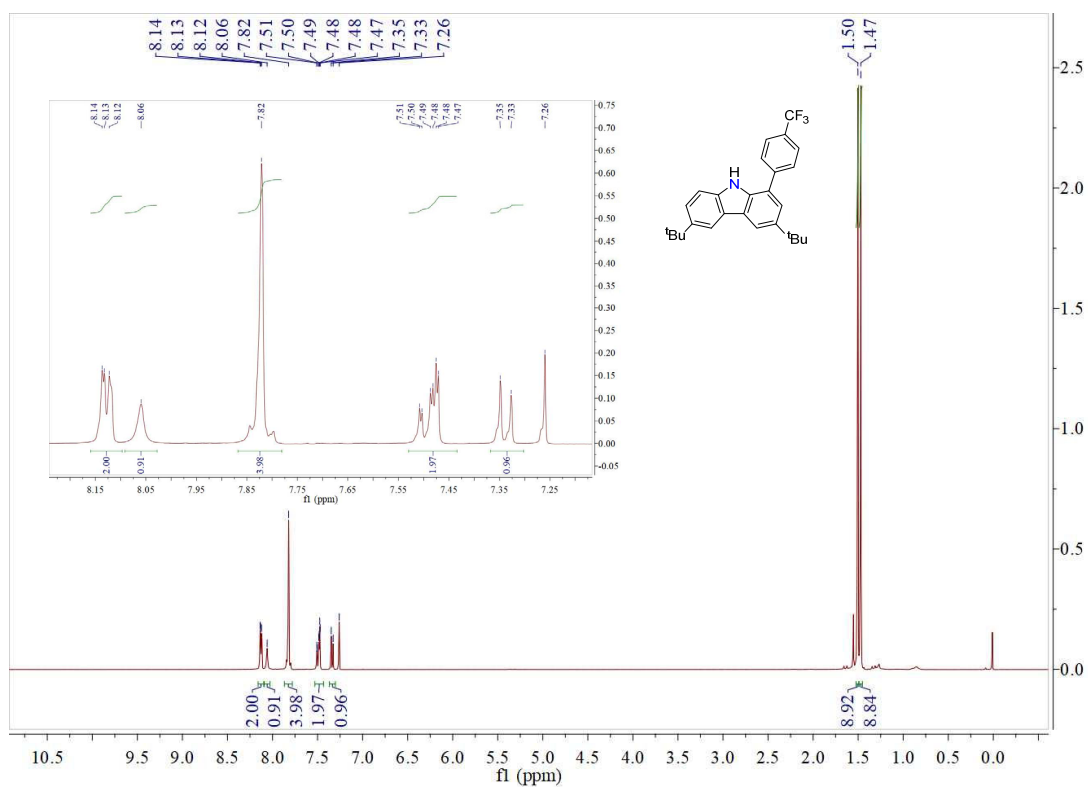

**Fig. S31**  $^1\text{H}$  NMR Spectra of **Cz5** (400 MHz,  $\text{CDCl}_3$ )

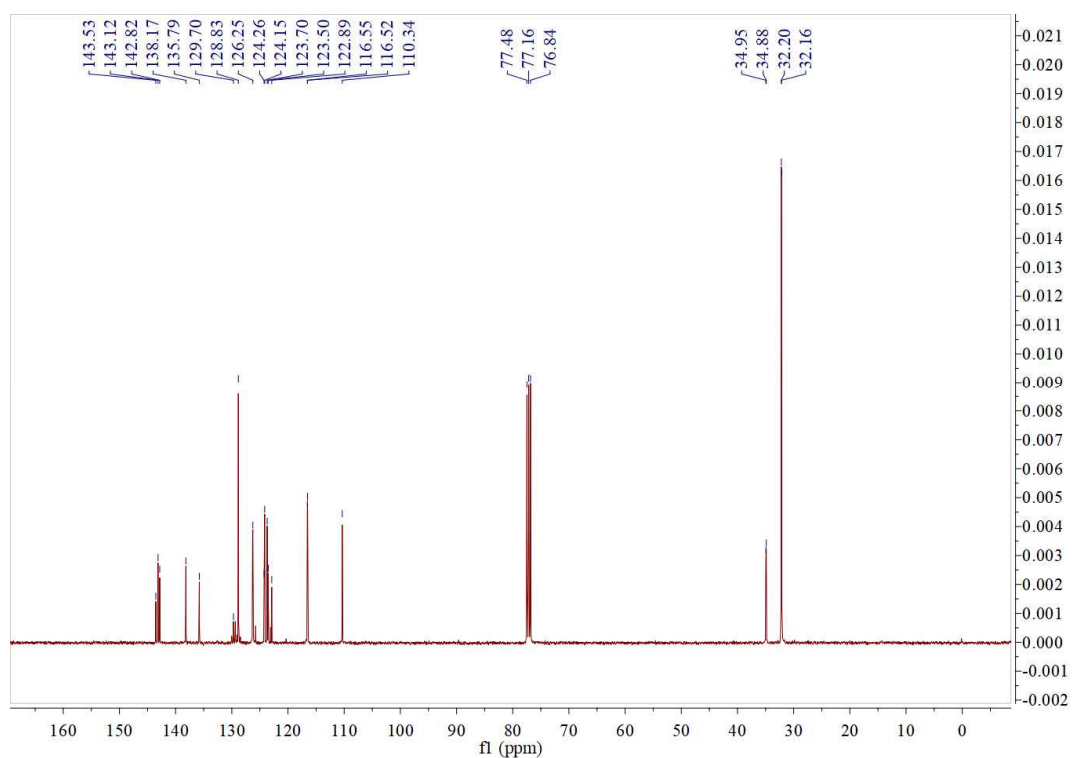

**Fig. S32**  $^{13}\text{C}$  NMR Spectra of **Cz5** (100 MHz,  $\text{CDCl}_3$ )

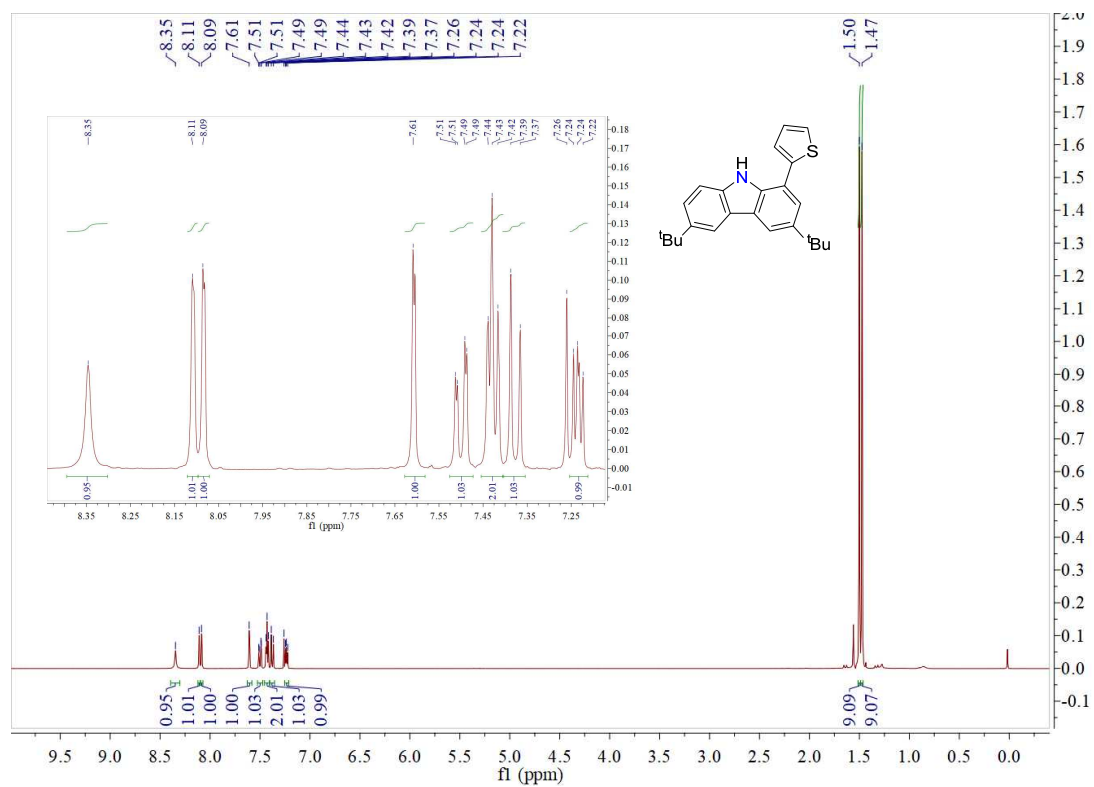

**Fig. S33**  $^1\text{H}$  NMR Spectra of Cz6 (400 MHz,  $\text{CDCl}_3$ )

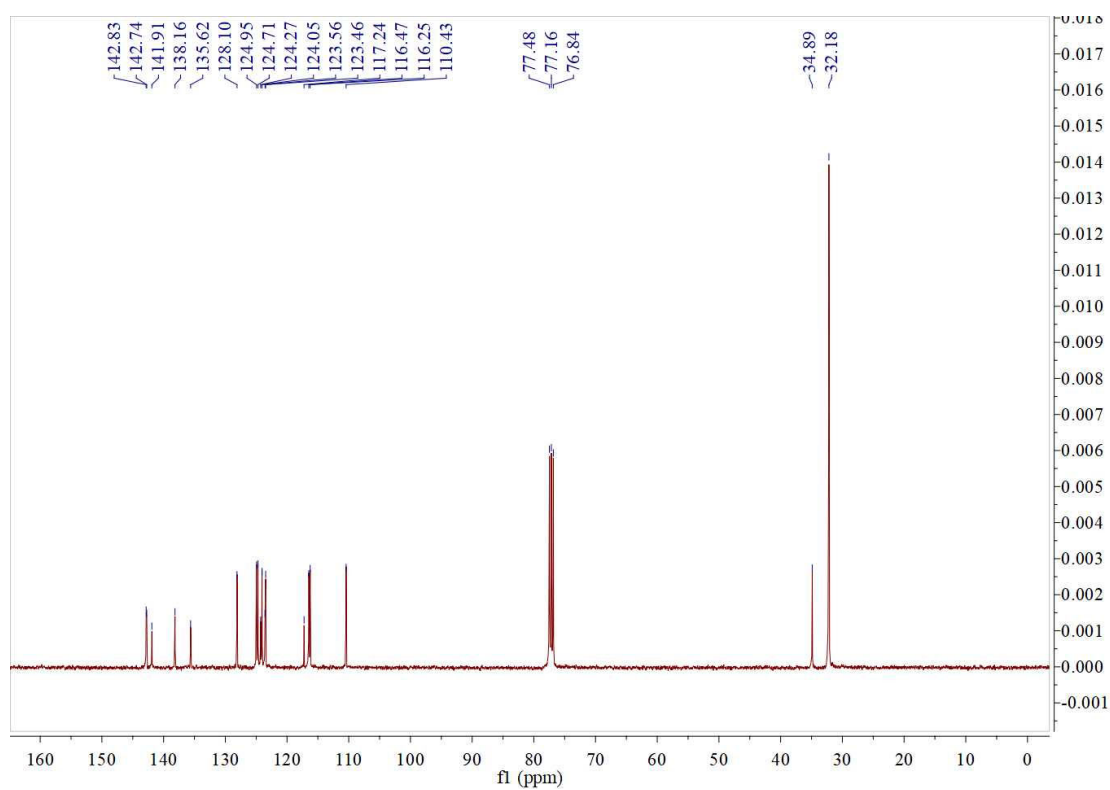

**Fig. S34**  $^{13}\text{C}$  NMR Spectra of Cz6 (100 MHz,  $\text{CDCl}_3$ )

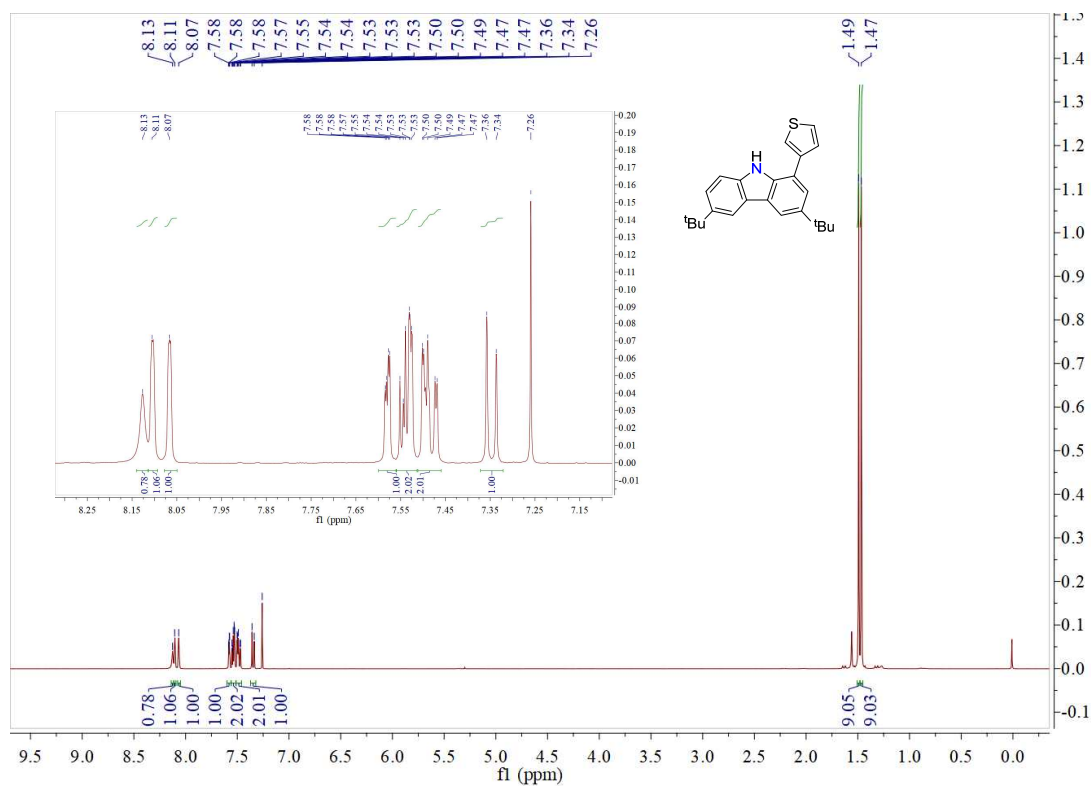

**Fig. S35** <sup>1</sup>H NMR Spectra of Cz7 (400 MHz, CDCl<sub>3</sub>)

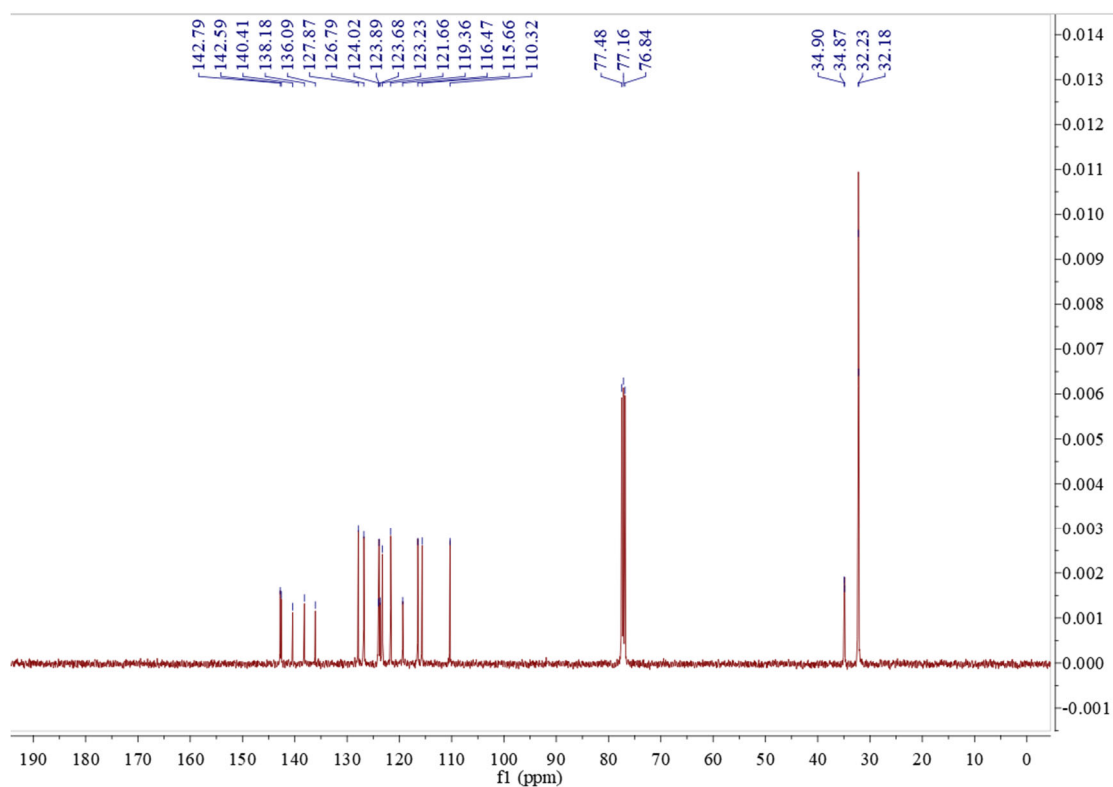

**Fig. S36** <sup>13</sup>C NMR Spectra of Cz7 (100 MHz, CDCl<sub>3</sub>)

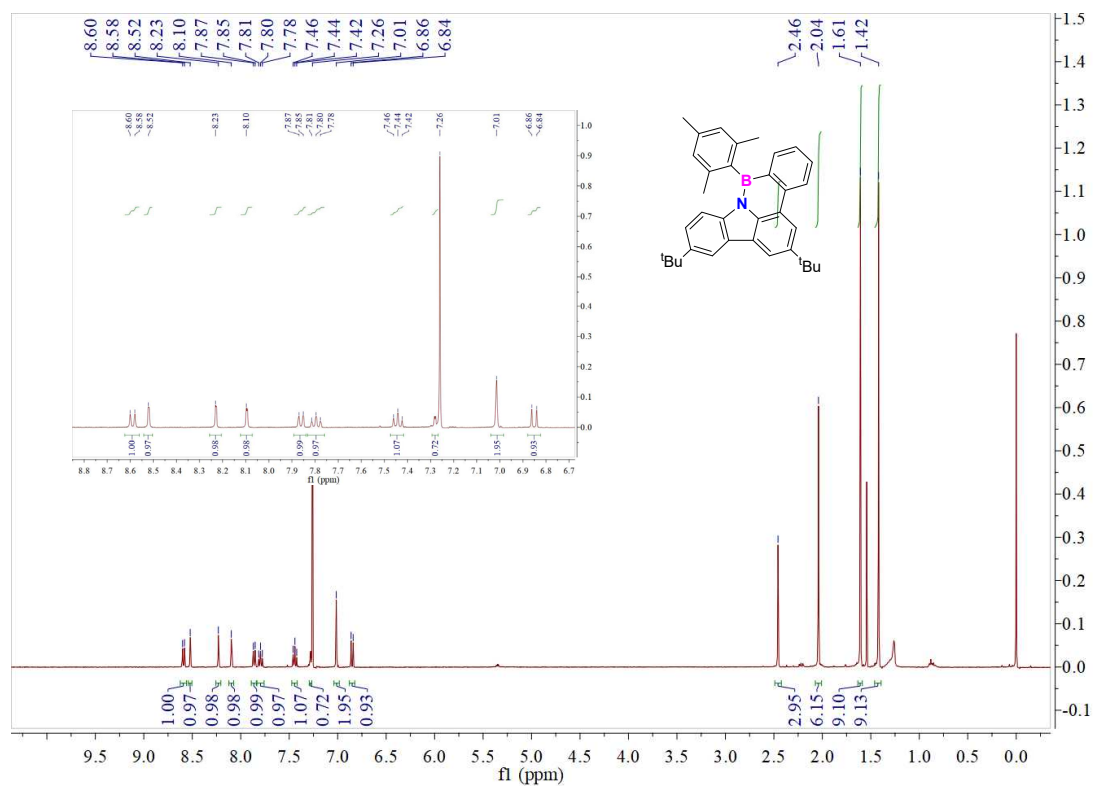

**Fig. S37** <sup>1</sup>H NMR Spectra of **1** (400 MHz, CDCl<sub>3</sub>)

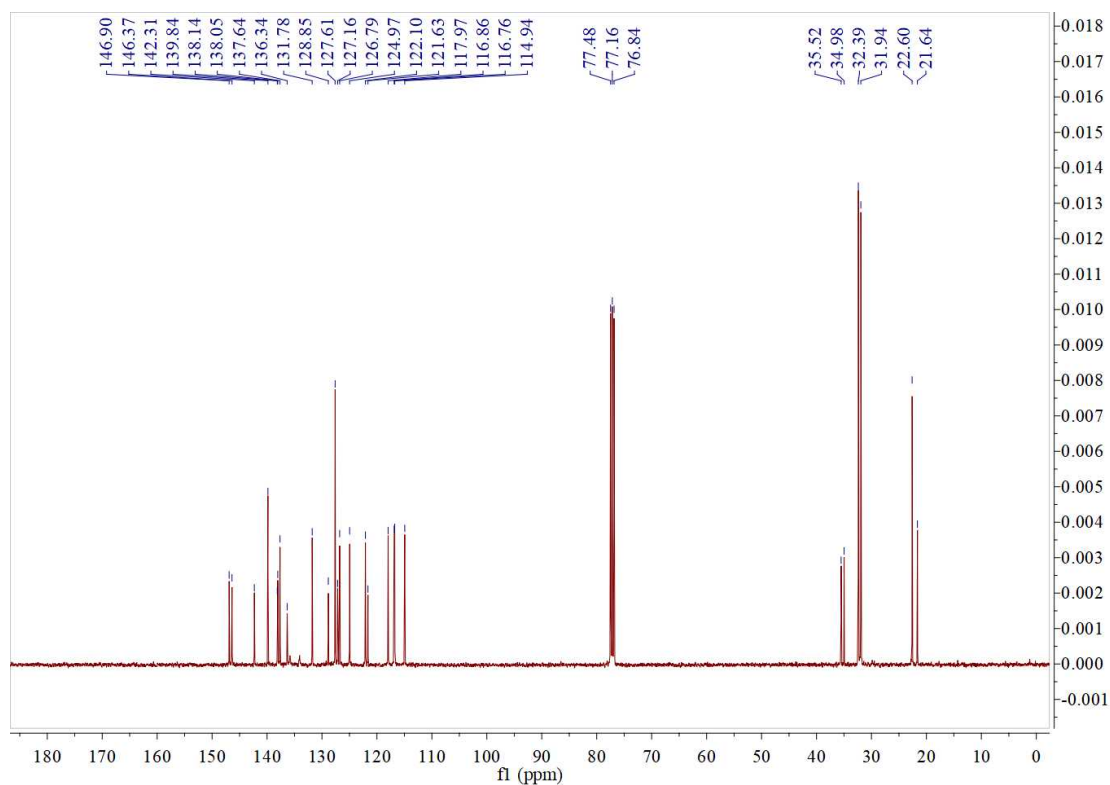

**Fig. S38** <sup>13</sup>C NMR Spectra of **1** (100 MHz, CDCl<sub>3</sub>)

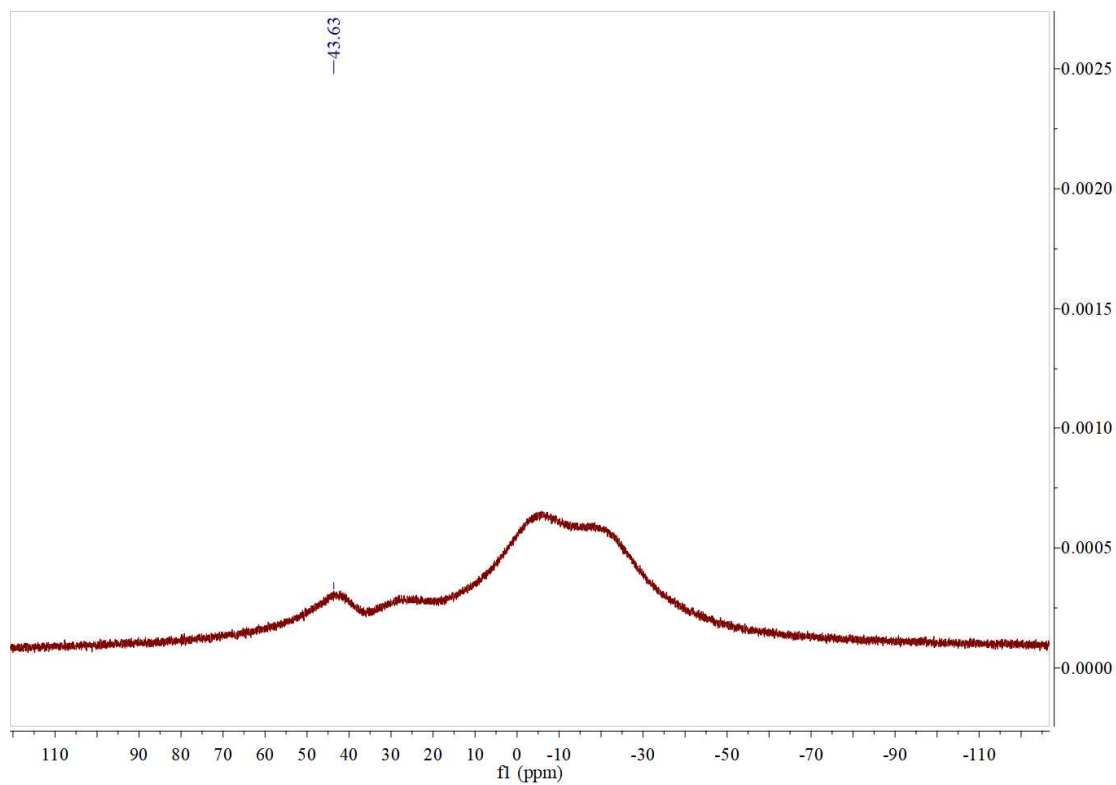

Fig. S39  $^{11}\text{B}$  NMR Spectra of **1** (128 MHz,  $\text{CDCl}_3$ )

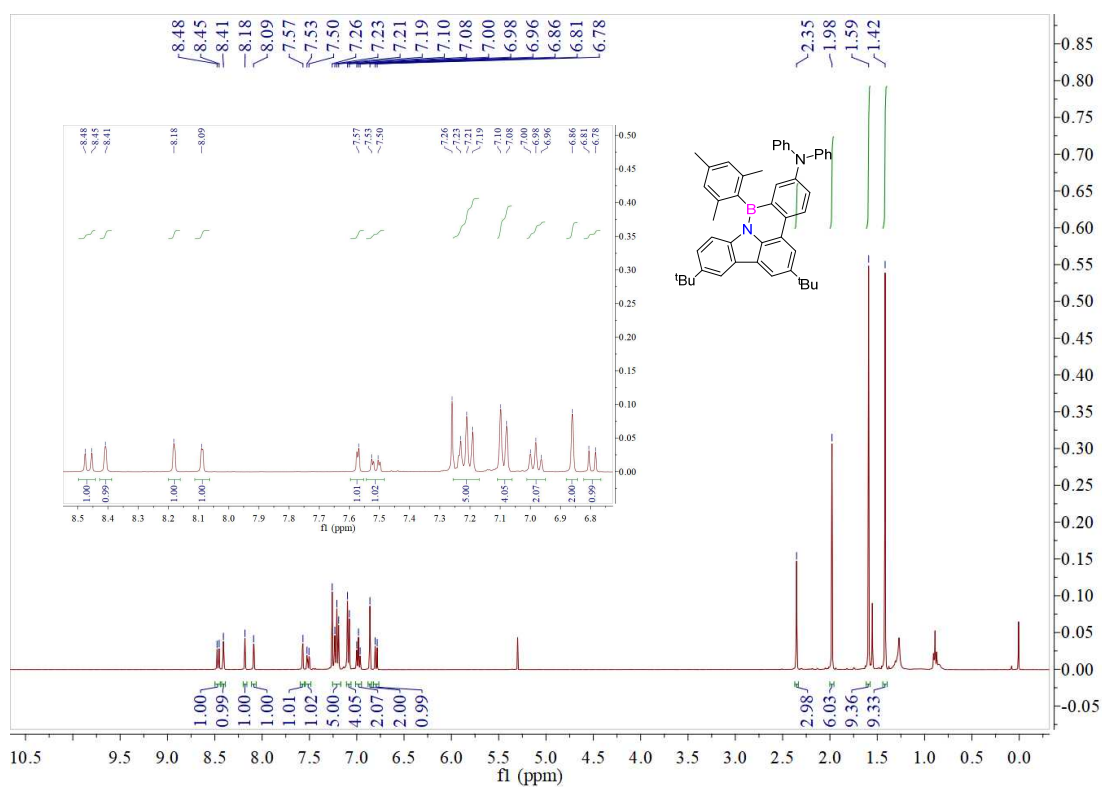

Fig. S40  $^1\text{H}$  NMR Spectra of **2** (400 MHz,  $\text{CDCl}_3$ )



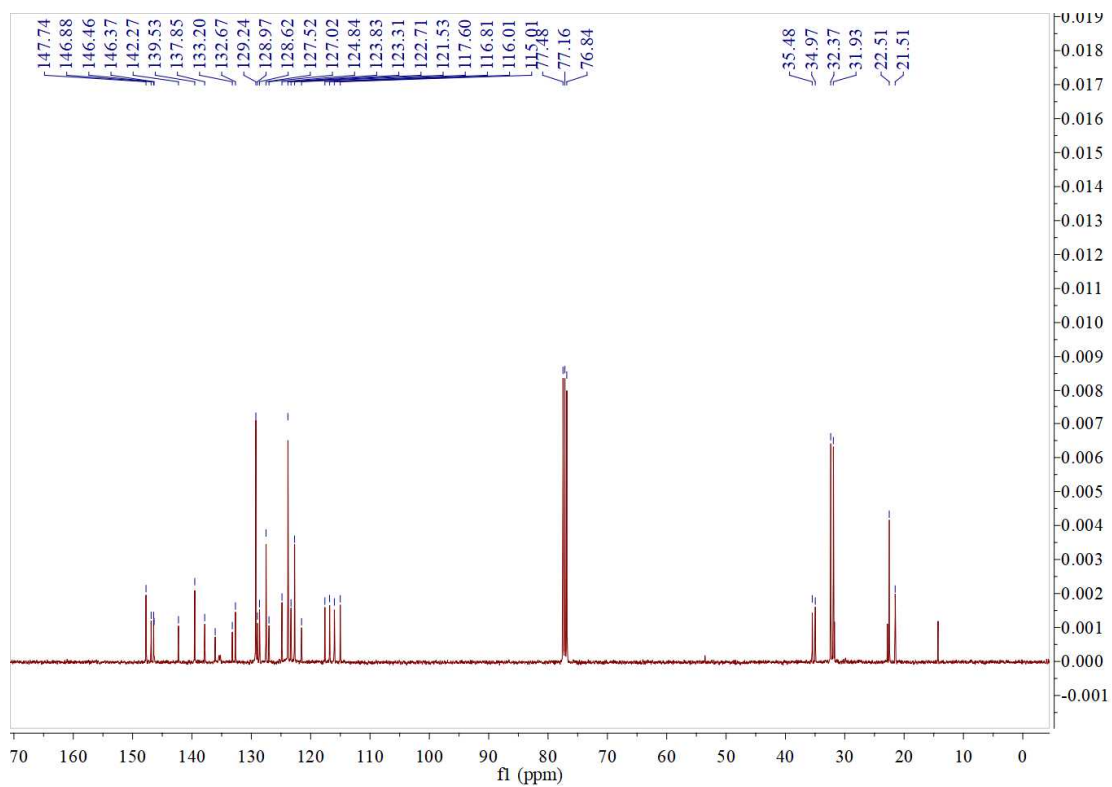

**Fig. S41**  $^{13}\text{C}$  NMR Spectra of **2** (100 MHz,  $\text{CDCl}_3$ )

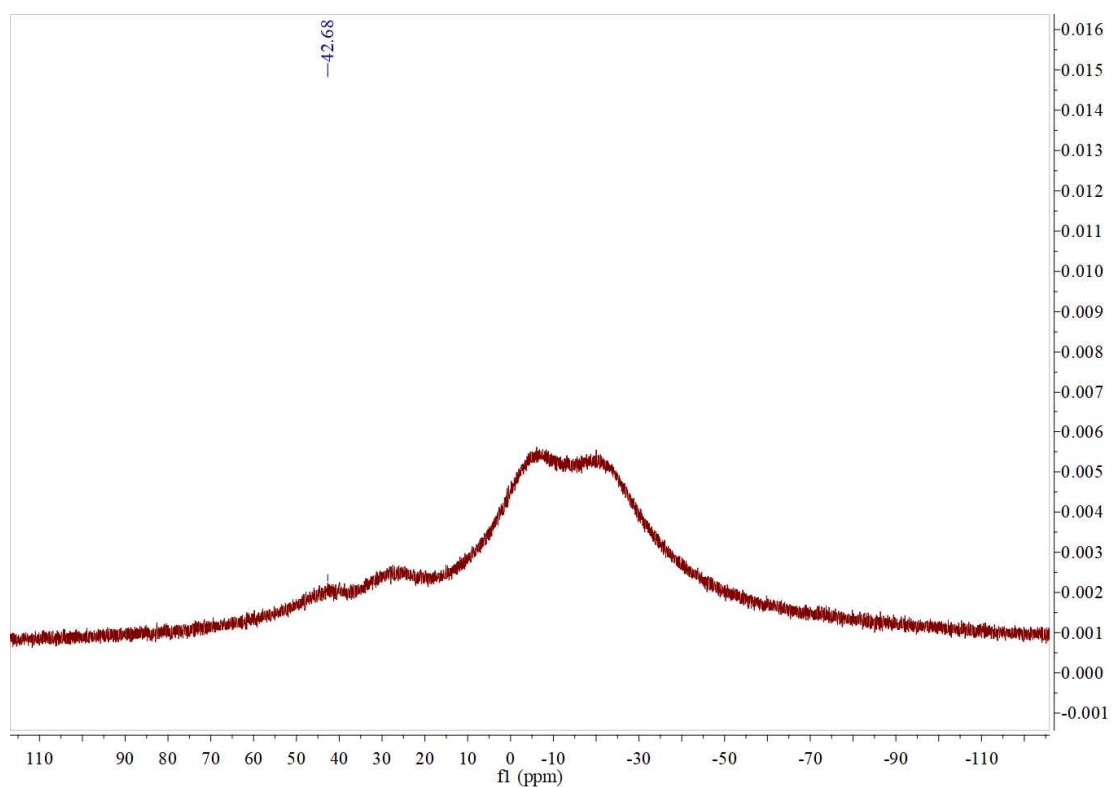

**Fig. S42**  $^{11}\text{B}$  NMR Spectra of **2** (128 MHz,  $\text{CDCl}_3$ )

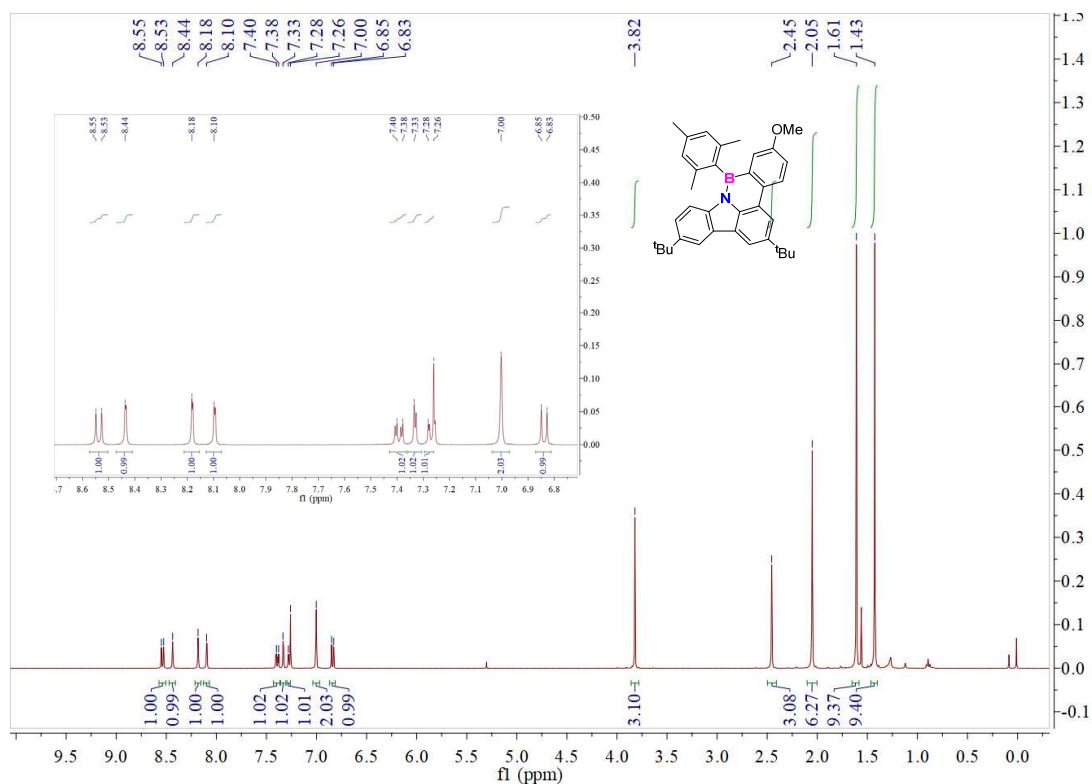

**Fig. S43**  $^1\text{H}$  NMR Spectra of **3** (400 MHz,  $\text{CDCl}_3$ )

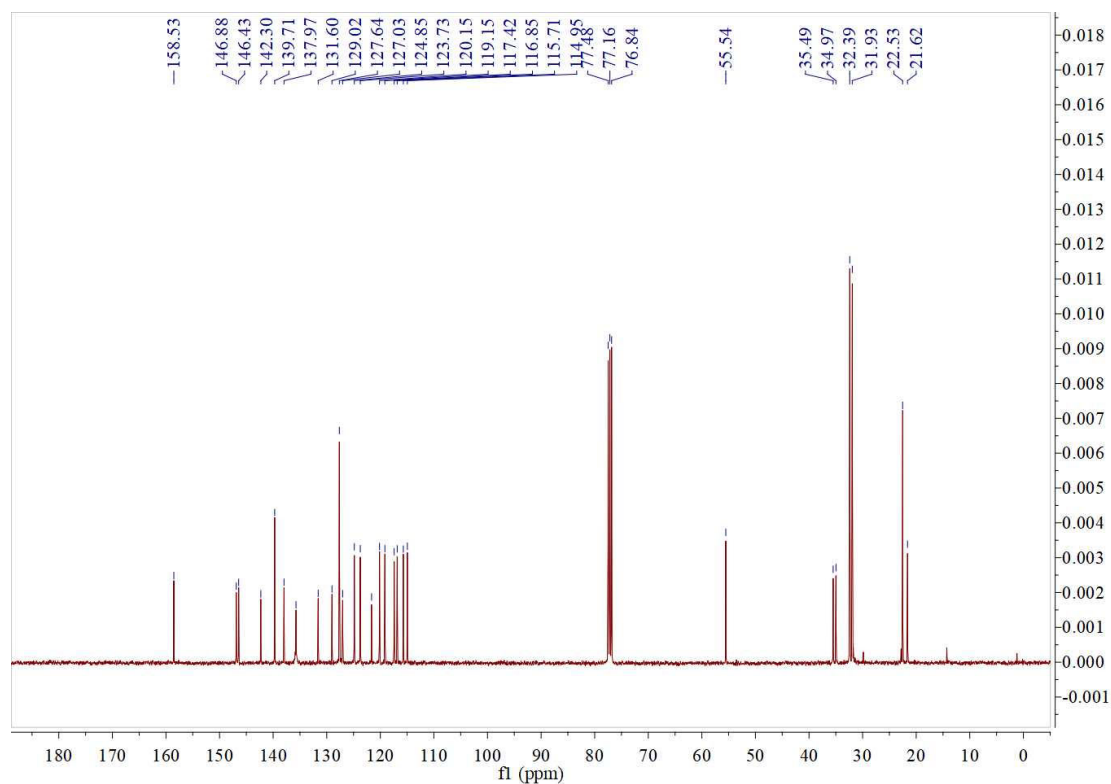

**Fig. S44**  $^{13}\text{C}$  NMR Spectra of **3** (100 MHz,  $\text{CDCl}_3$ )

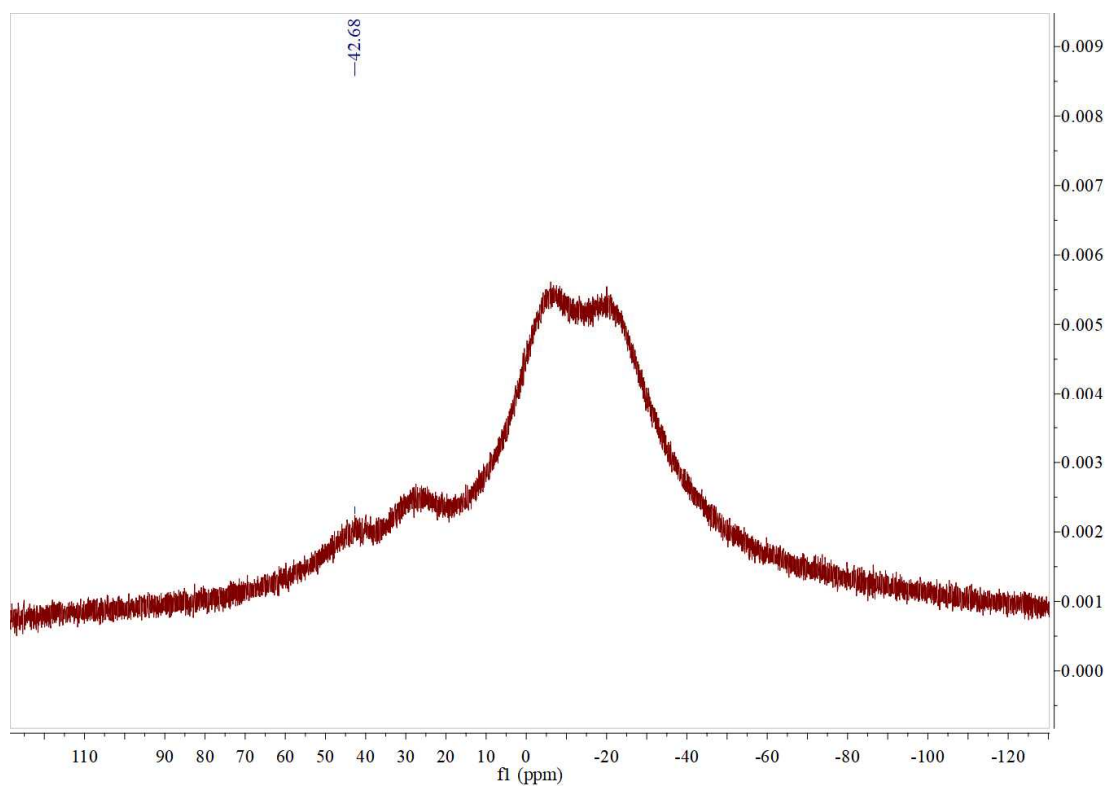

Fig. S45 <sup>11</sup>B NMR Spectra of **3** (128 MHz, CDCl<sub>3</sub>)

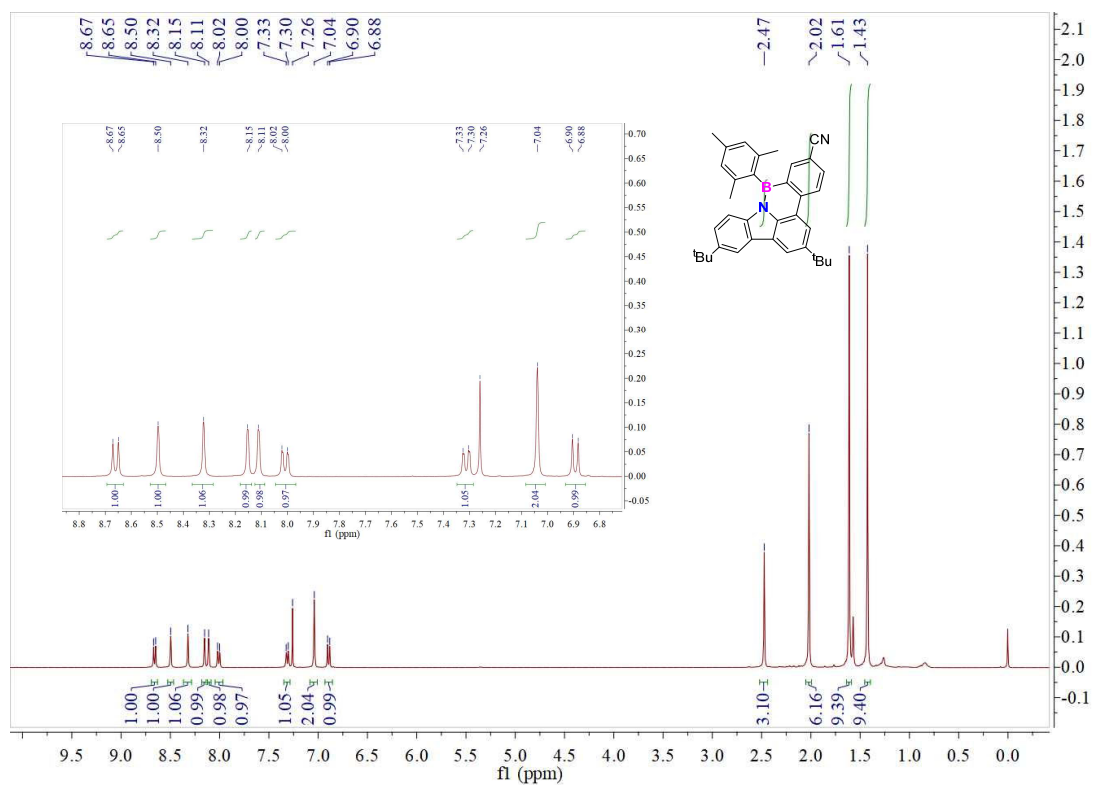

Fig. S46 <sup>1</sup>H NMR Spectra of **4** (400 MHz, CDCl<sub>3</sub>)

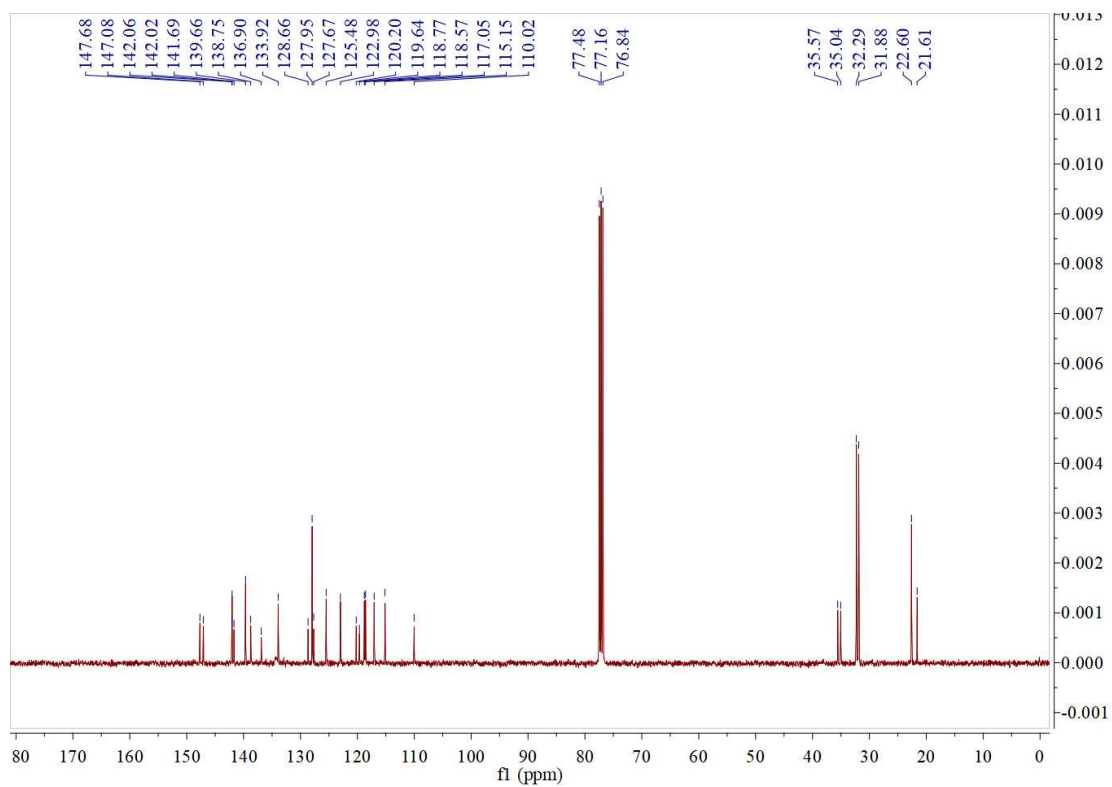

**Fig. S47**  $^{13}\text{C}$  NMR Spectra of **4** (100 MHz,  $\text{CDCl}_3$ )

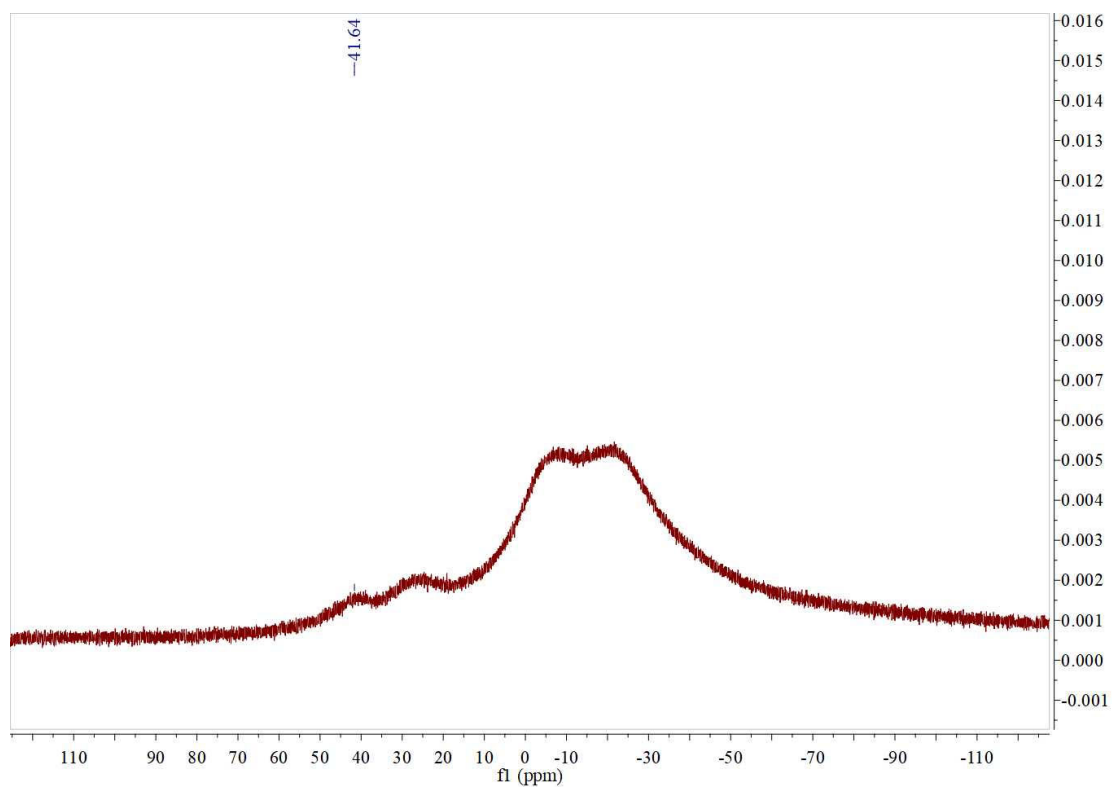

**Fig. S48**  $^{11}\text{B}$  NMR Spectra of **4** (128 MHz,  $\text{CDCl}_3$ )

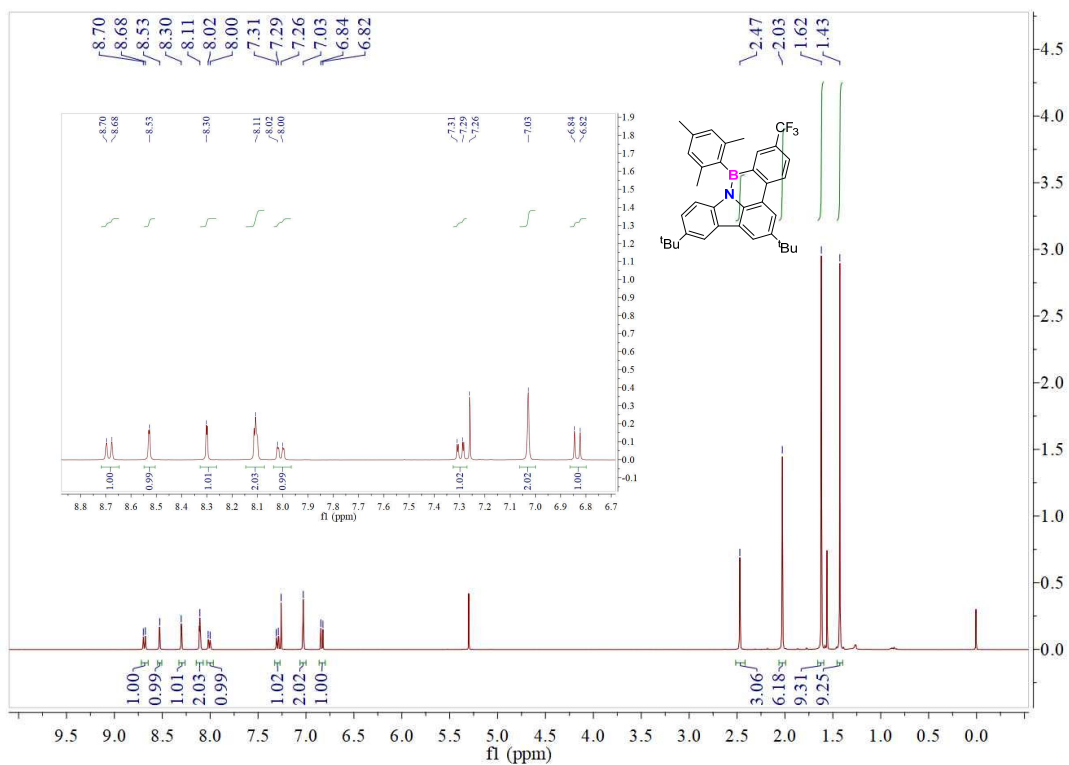

**Fig. S49**  $^1\text{H}$  NMR Spectra of **5** (400 MHz,  $\text{CDCl}_3$ )

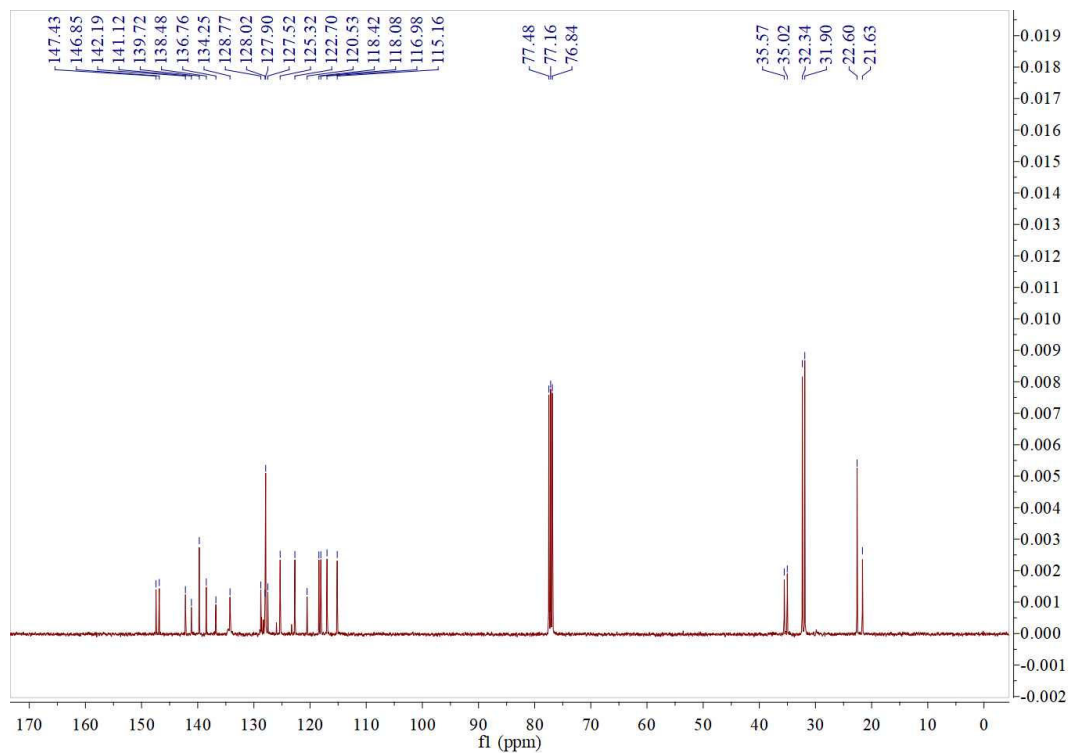

**Fig. S50**  $^{13}\text{C}$  NMR Spectra of **5** (100 MHz,  $\text{CDCl}_3$ )

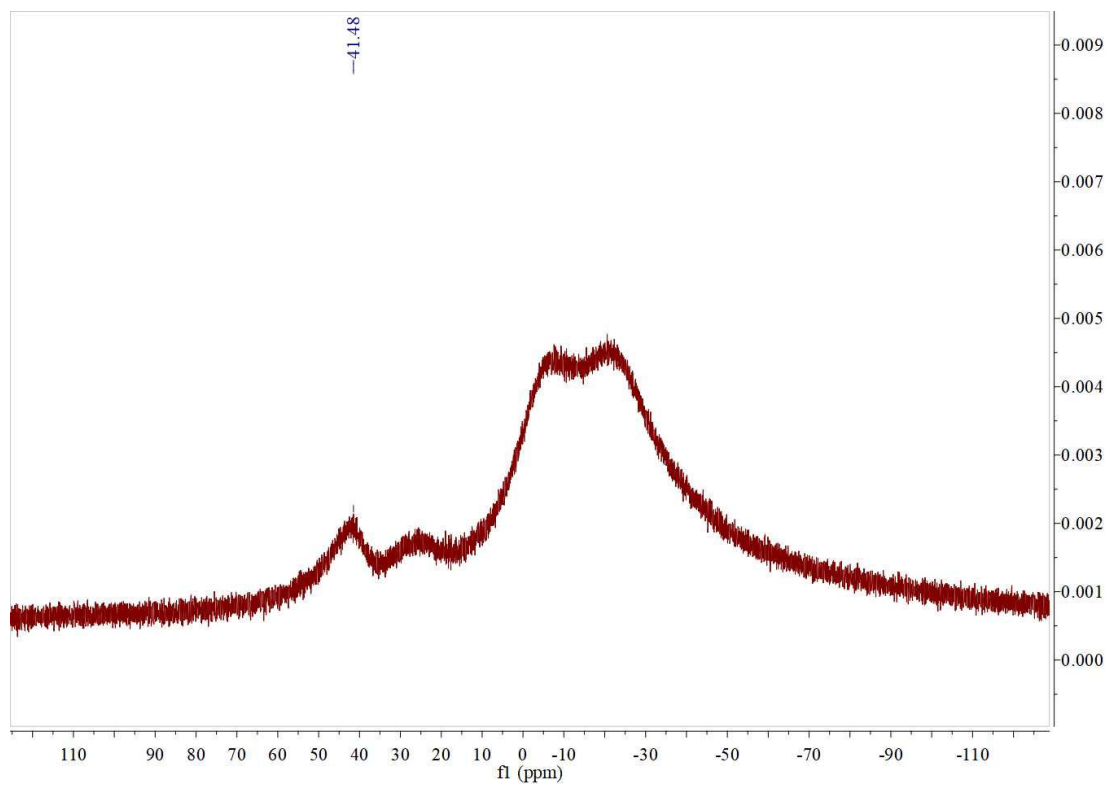

**Fig. S51**  $^{11}\text{B}$  NMR Spectra of **5** (128 MHz,  $\text{CDCl}_3$ )

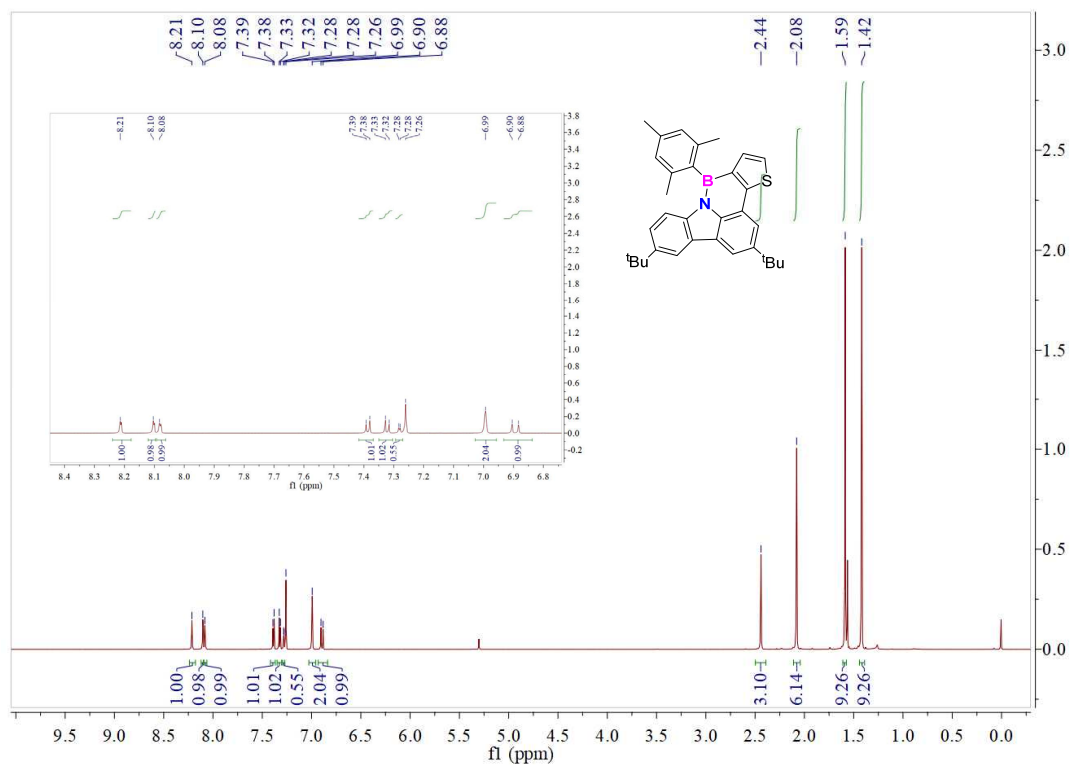

**Fig. S52**  $^1\text{H}$  NMR Spectra of **6** (400 MHz,  $\text{CDCl}_3$ )

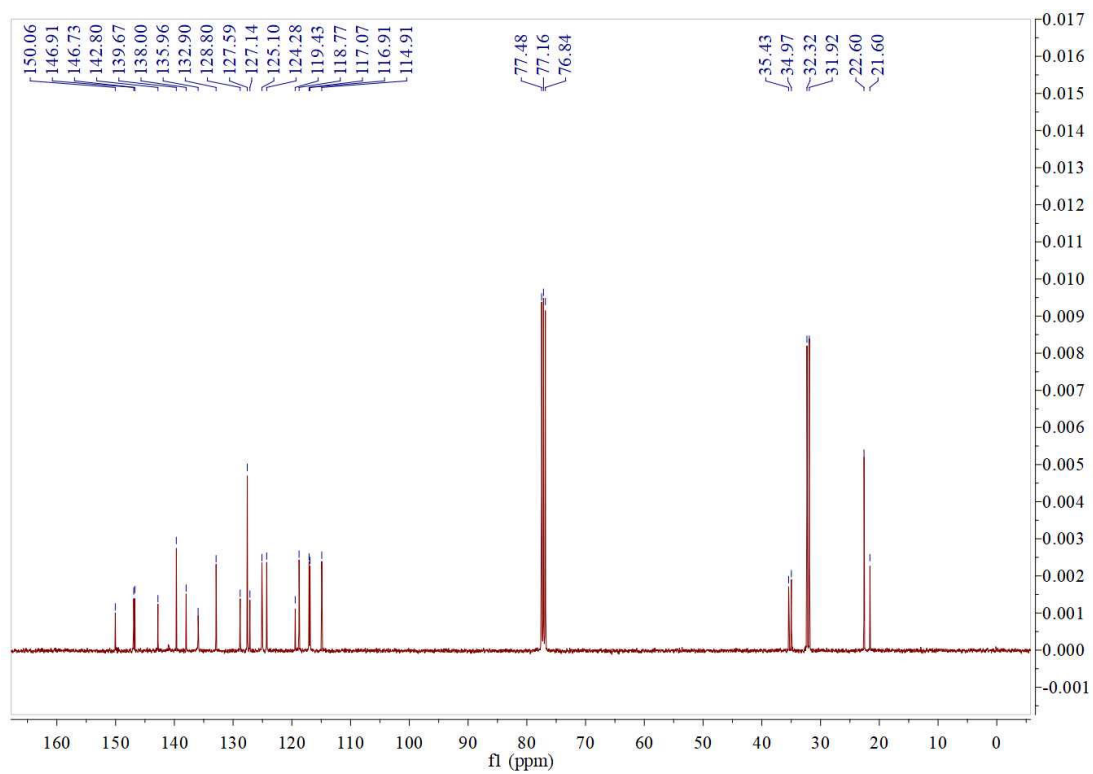

**Fig. S53**  $^{13}\text{C}$  NMR Spectra of **6** (100 MHz,  $\text{CDCl}_3$ )

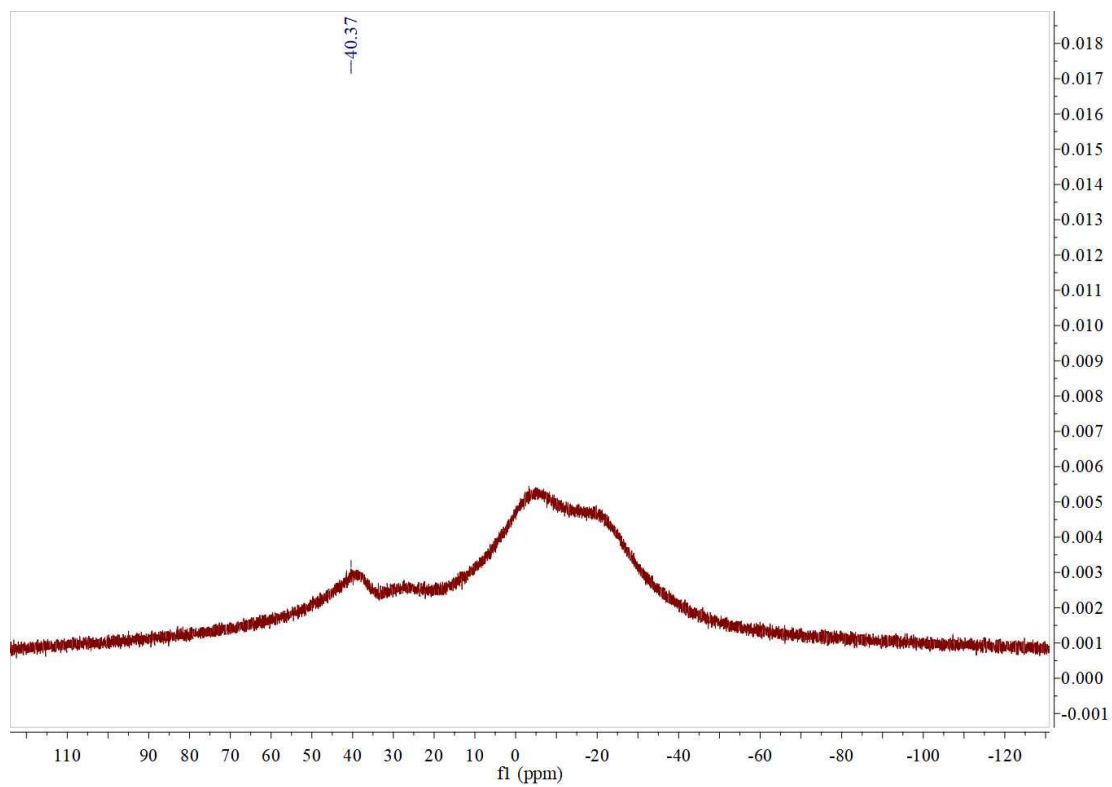

**Fig. S54**  $^{11}\text{B}$  NMR Spectra of **6** (128 MHz,  $\text{CDCl}_3$ )

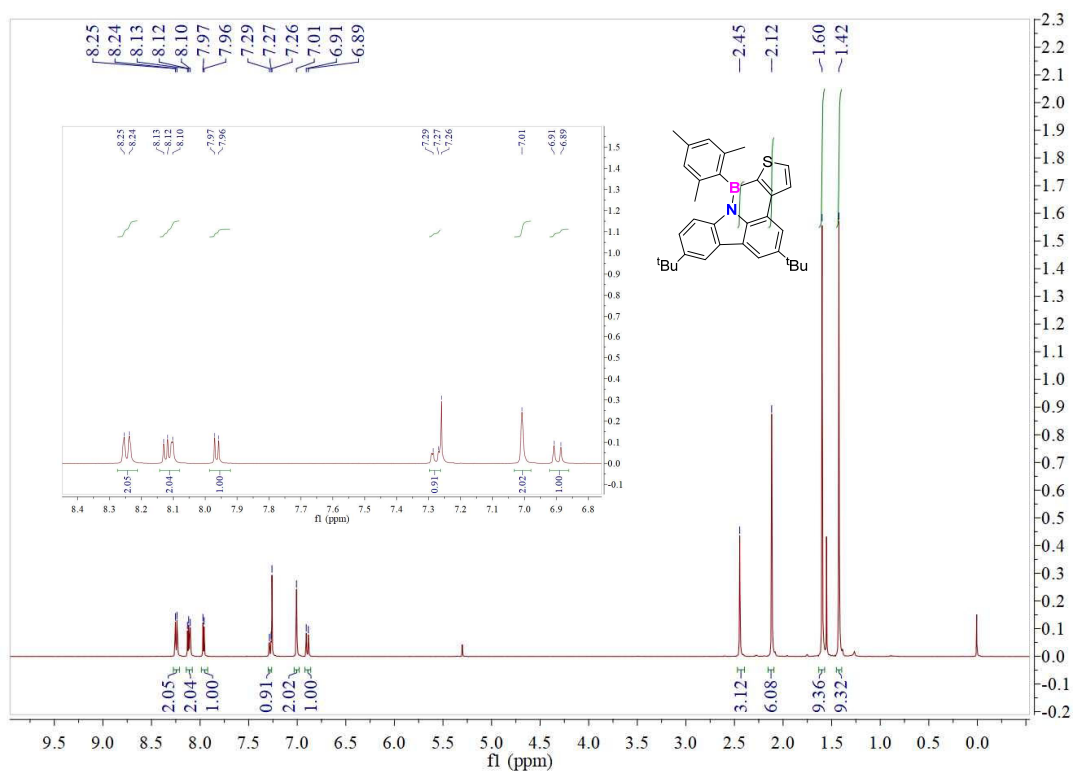

**Fig. S55** <sup>1</sup>H NMR Spectra of **7** (400 MHz, CDCl<sub>3</sub>)

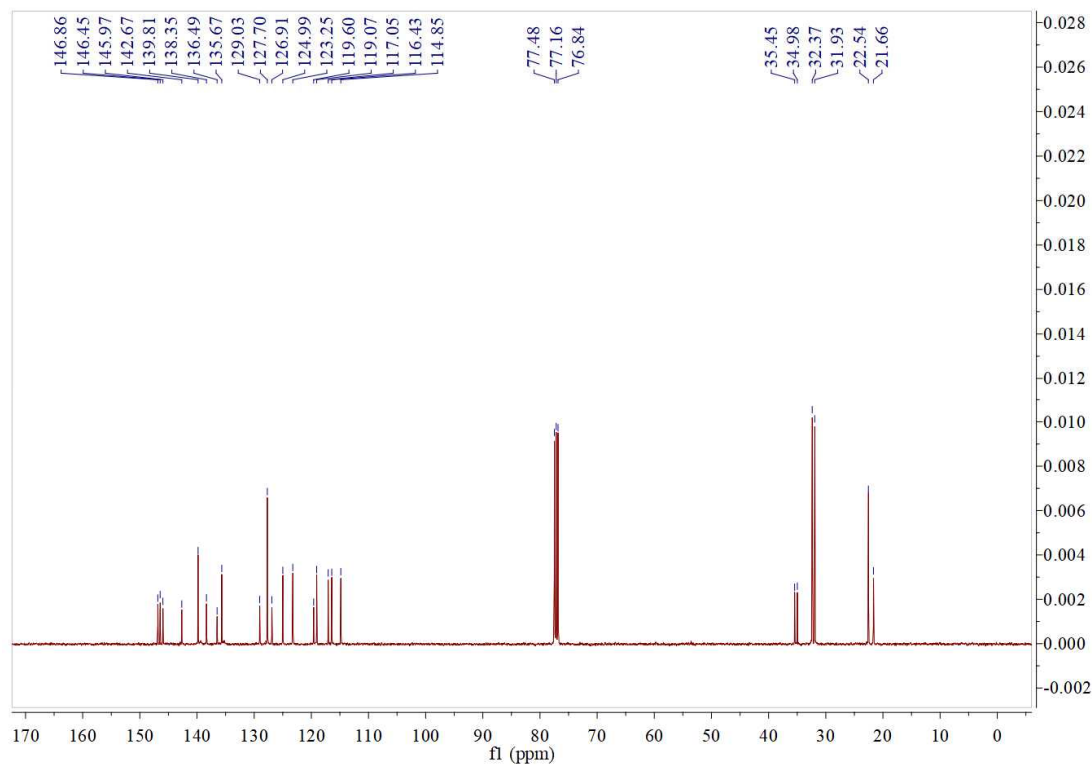

**Fig. S56** <sup>13</sup>C NMR Spectra of **7** (100 MHz, CDCl<sub>3</sub>)



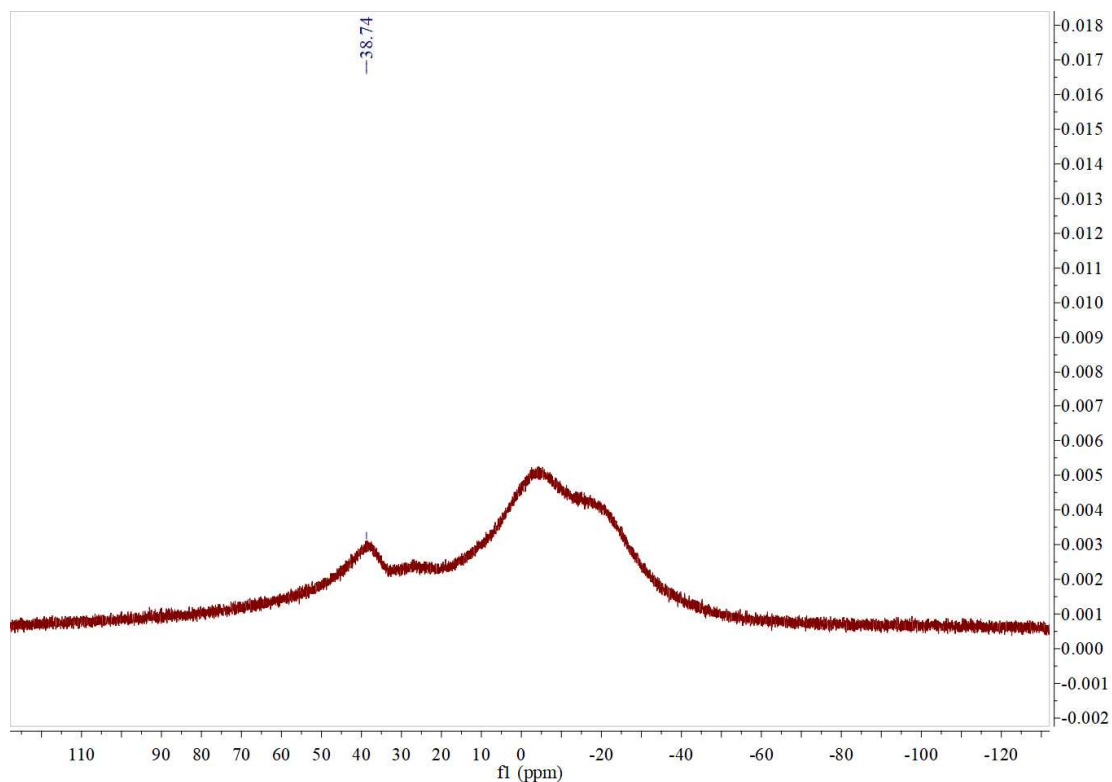

Fig. S57  $^{11}\text{B}$  NMR Spectra of **7** (128 MHz,  $\text{CDCl}_3$ )

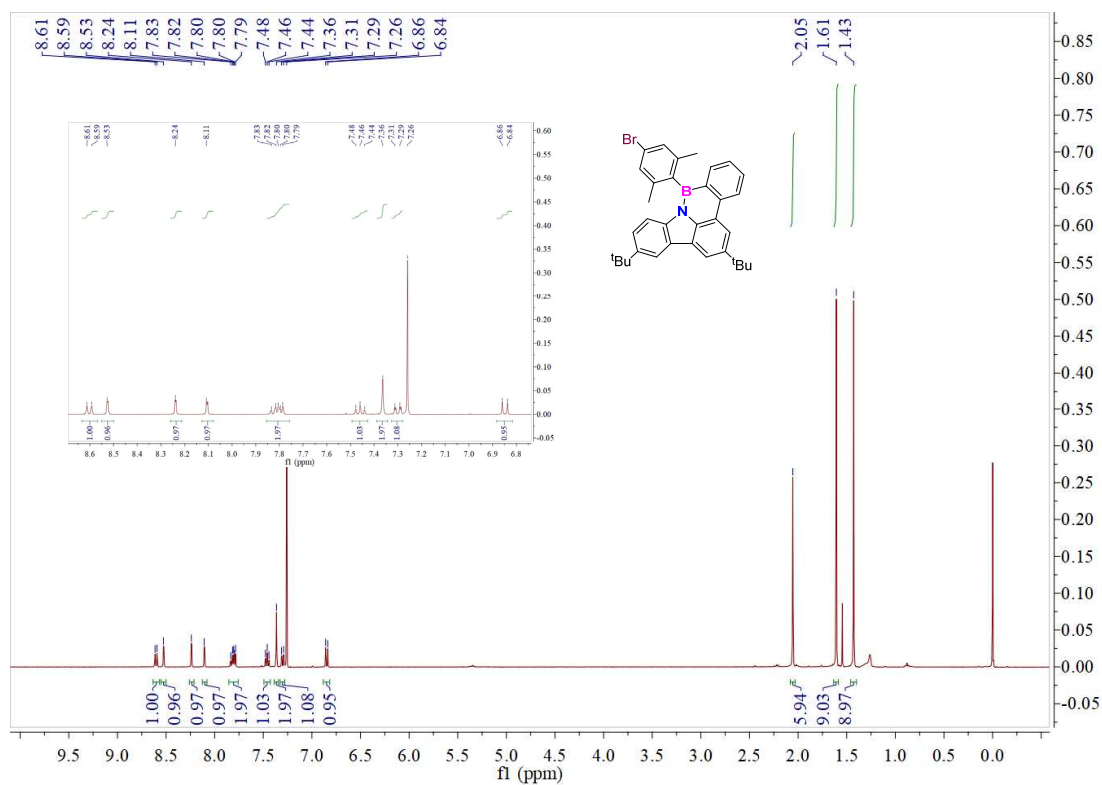

Fig. S58  $^1\text{H}$  NMR Spectra of **8** (400 MHz,  $\text{CDCl}_3$ )

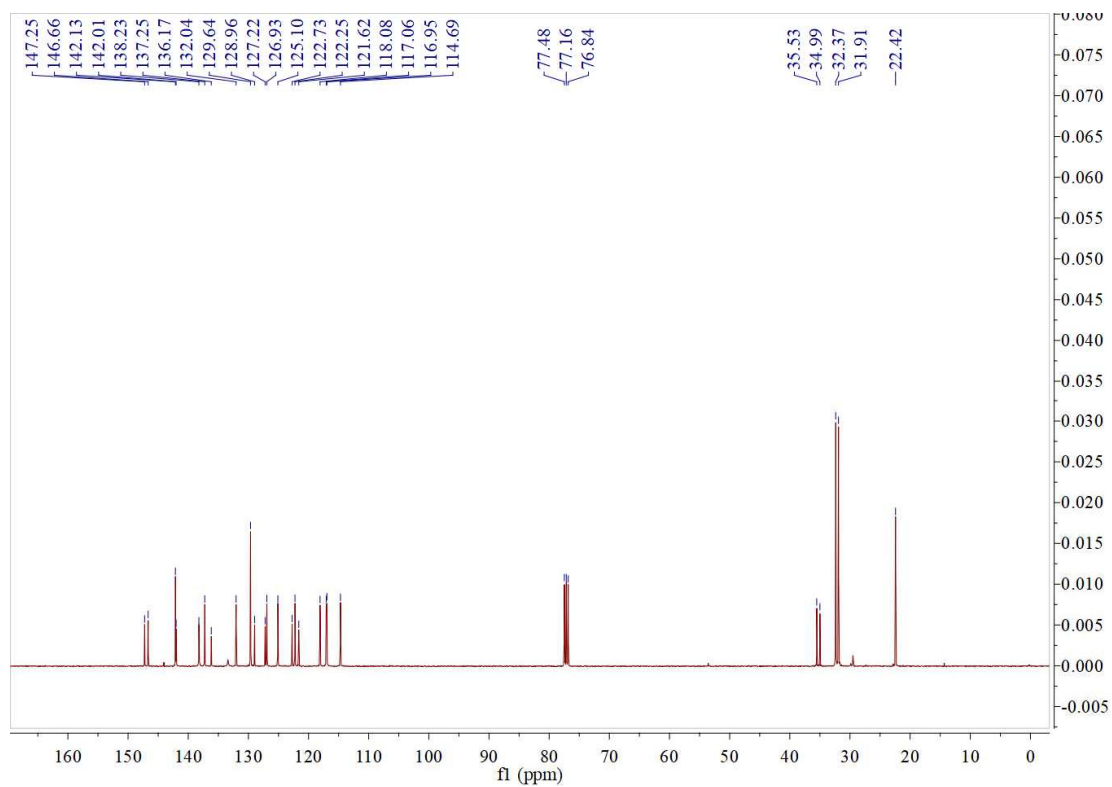

**Fig. S59**  $^{13}\text{C}$  NMR Spectra of **8** (100 MHz,  $\text{CDCl}_3$ )

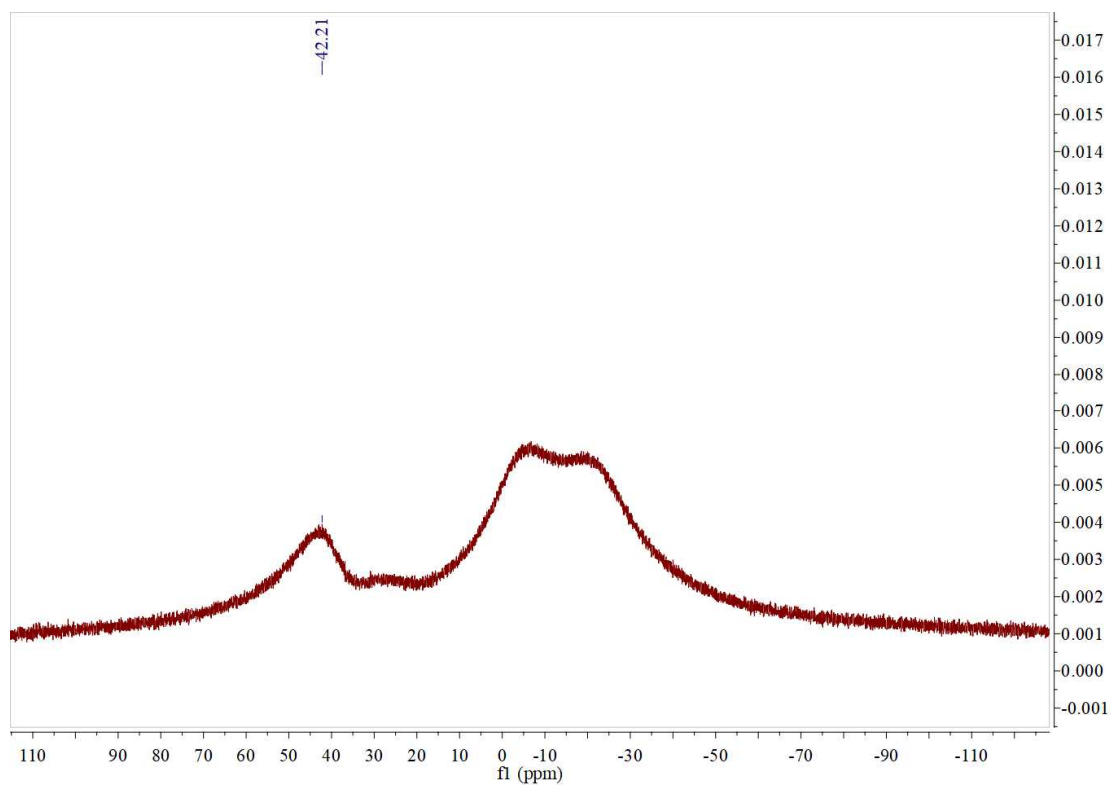

**Fig. S60**  $^{11}\text{B}$  NMR Spectra of **8** (128 MHz,  $\text{CDCl}_3$ )

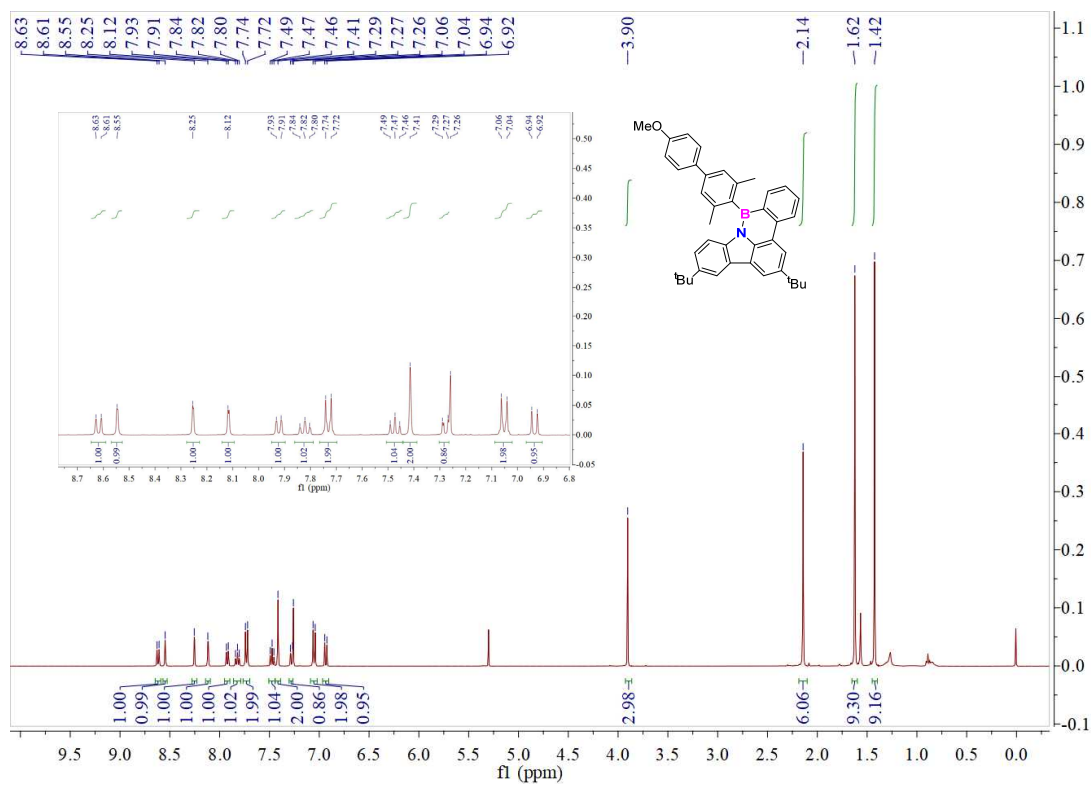

**Fig. S61**  $^1\text{H}$  NMR Spectra of **9** (400 MHz,  $\text{CDCl}_3$ )

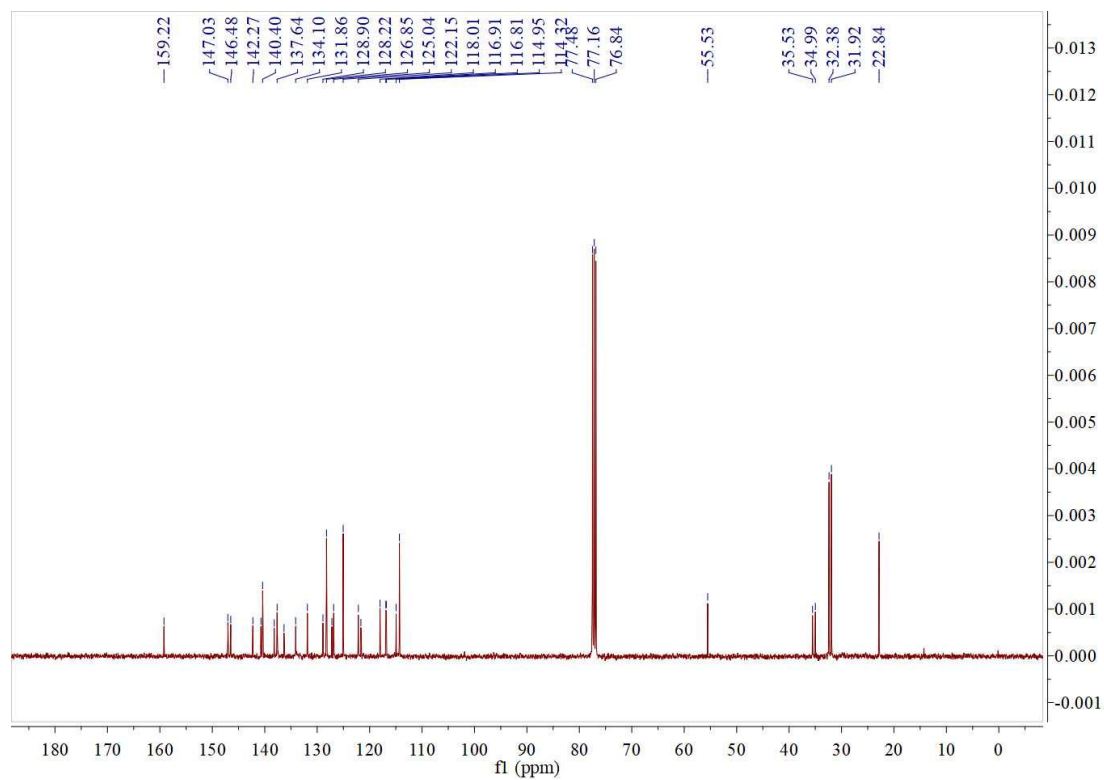

**Fig. S62**  $^{13}\text{C}$  NMR Spectra of **9** (100 MHz,  $\text{CDCl}_3$ )

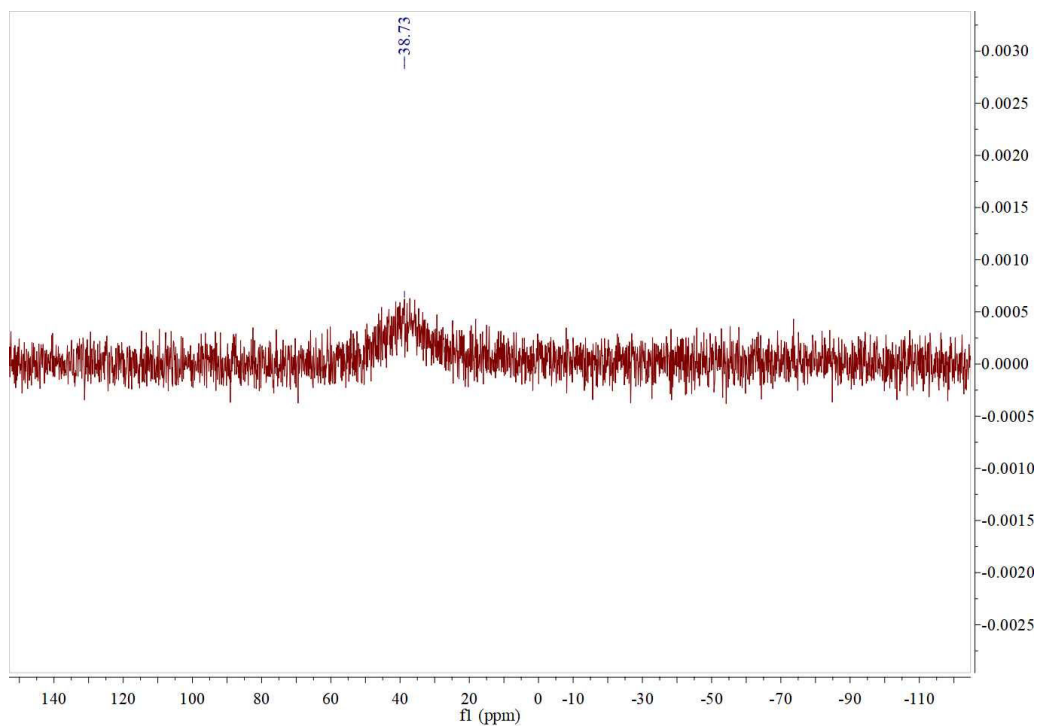

**Fig. S63**  $^{11}\text{B}$  NMR Spectra of **9** (128 MHz,  $\text{CDCl}_3$ , in quartz NMR tube)

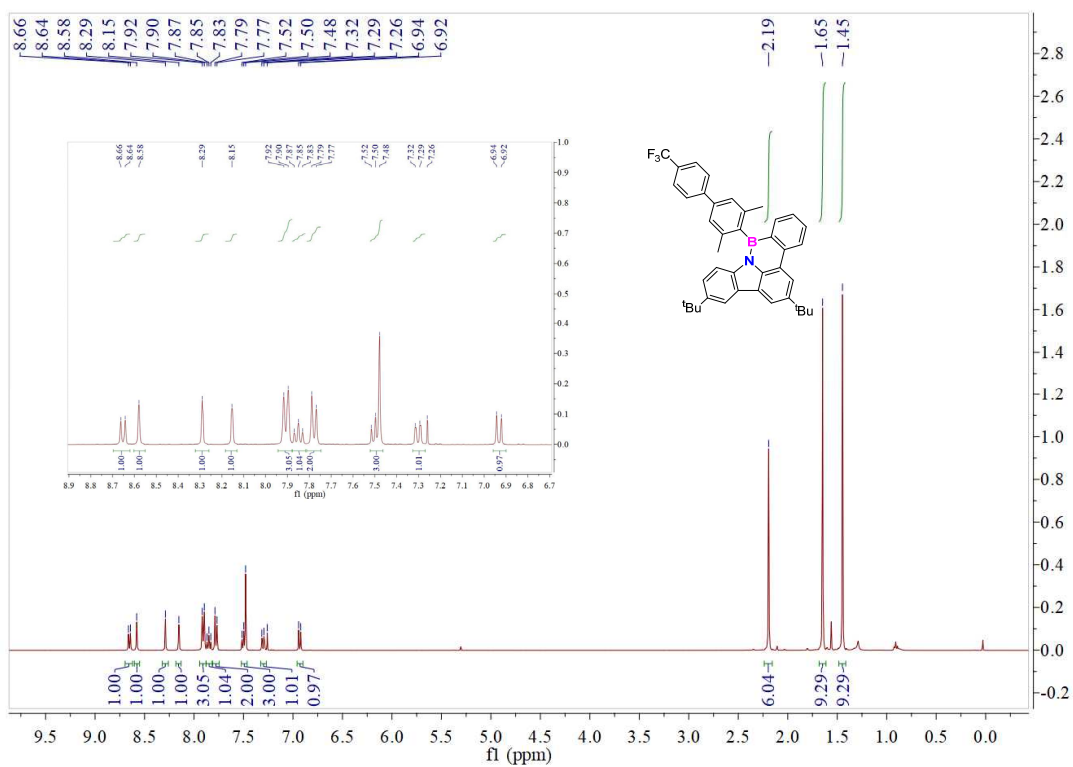

**Fig. S64**  $^1\text{H}$  NMR Spectra of **10** (400 MHz,  $\text{CDCl}_3$ )

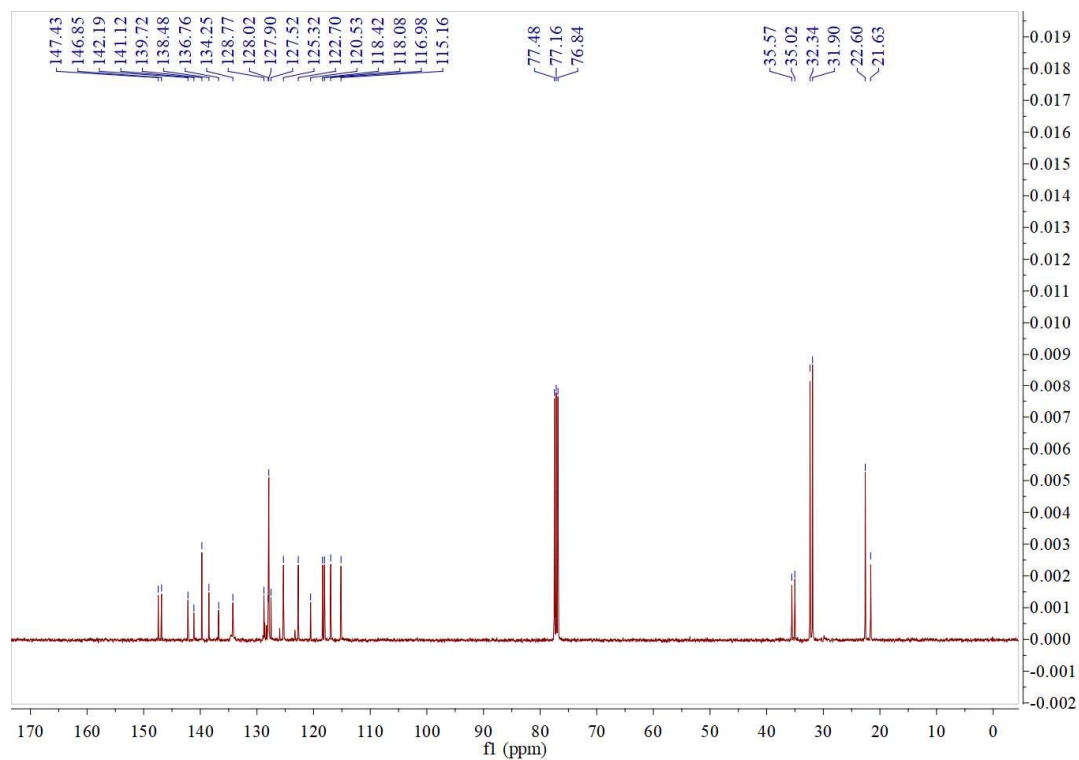

**Fig. S65**  $^{13}\text{C}$  NMR Spectra of **10** (100 MHz,  $\text{CDCl}_3$ )

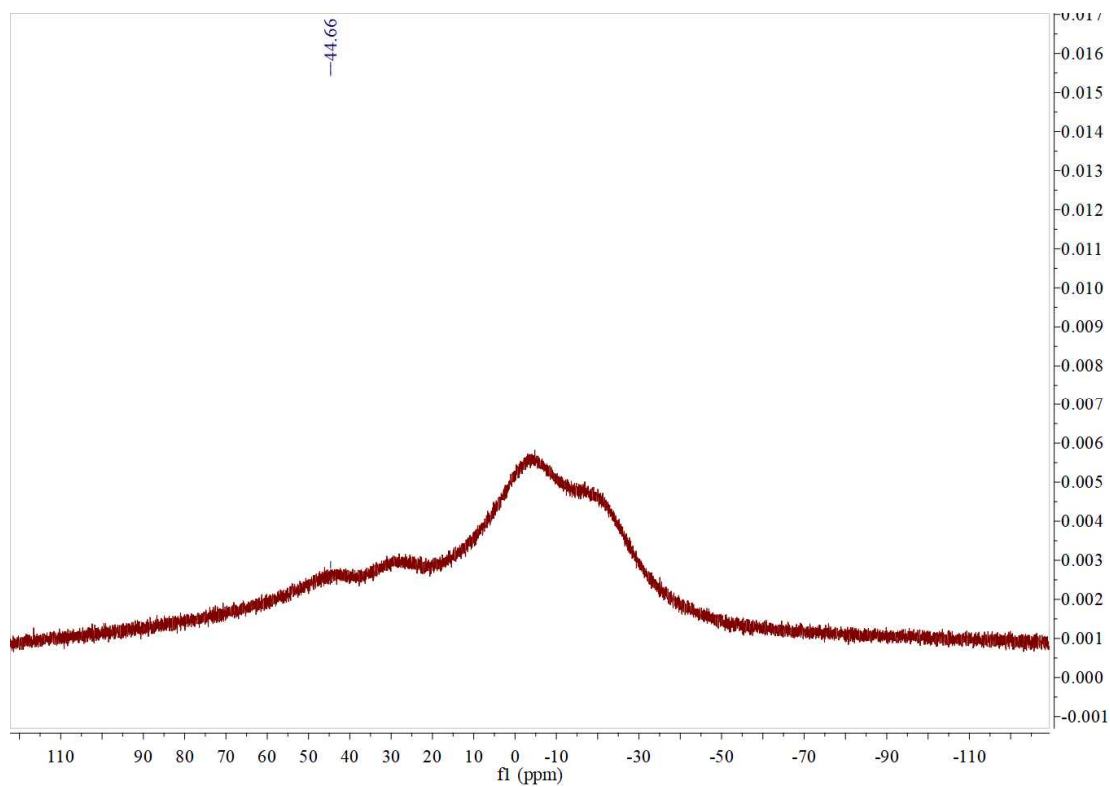

**Fig. S66**  $^{11}\text{B}$  NMR Spectra of **10** (128 MHz,  $\text{CDCl}_3$ )

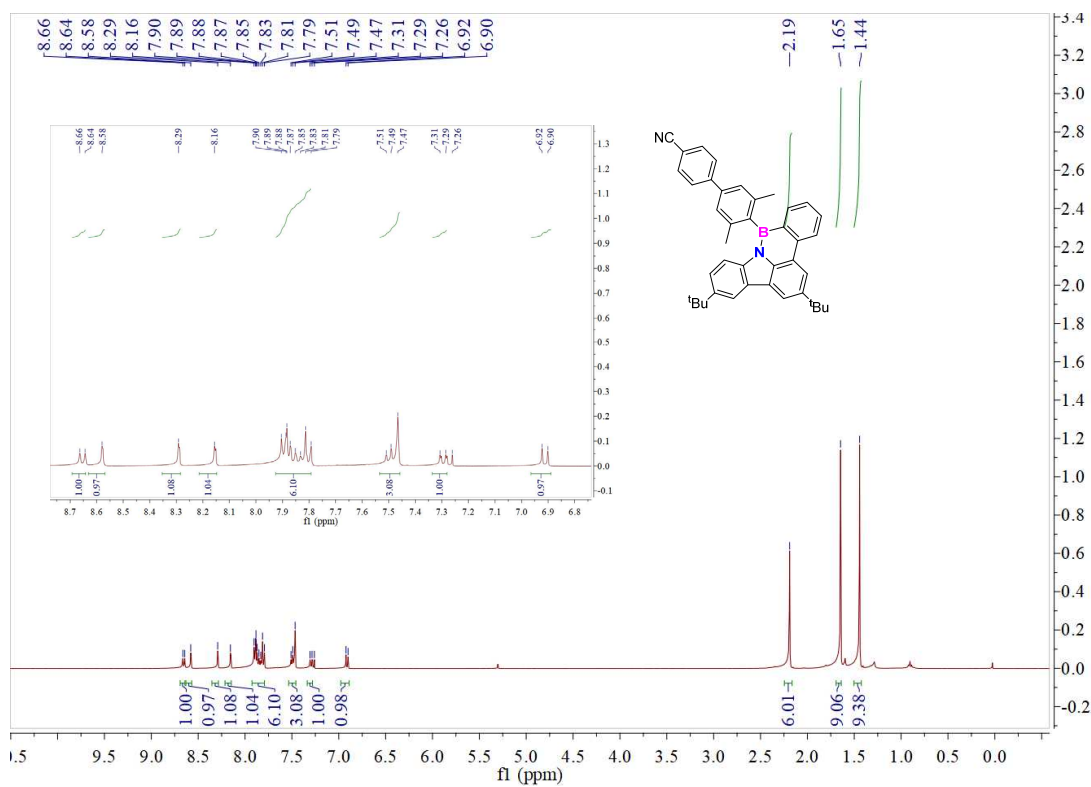

**Fig. S67** <sup>1</sup>H NMR Spectra of **11** (400 MHz, CDCl<sub>3</sub>)

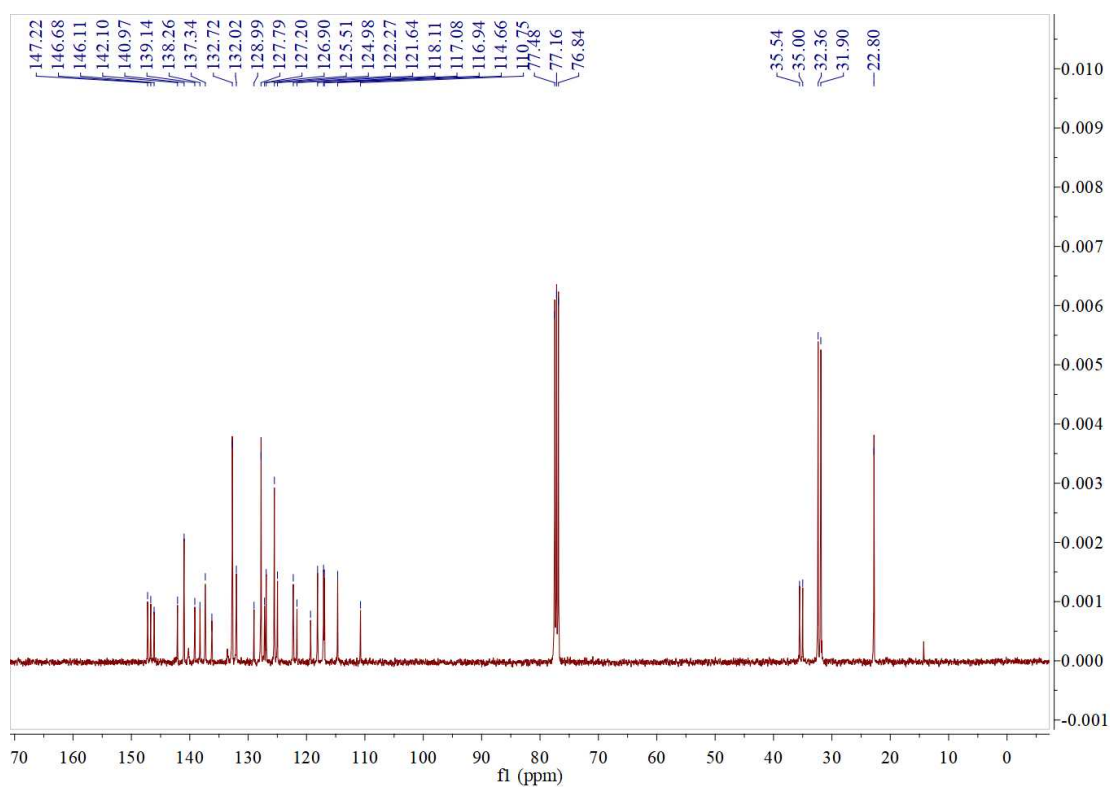

**Fig. S68** <sup>13</sup>C NMR Spectra of **11** (100 MHz, CDCl<sub>3</sub>)

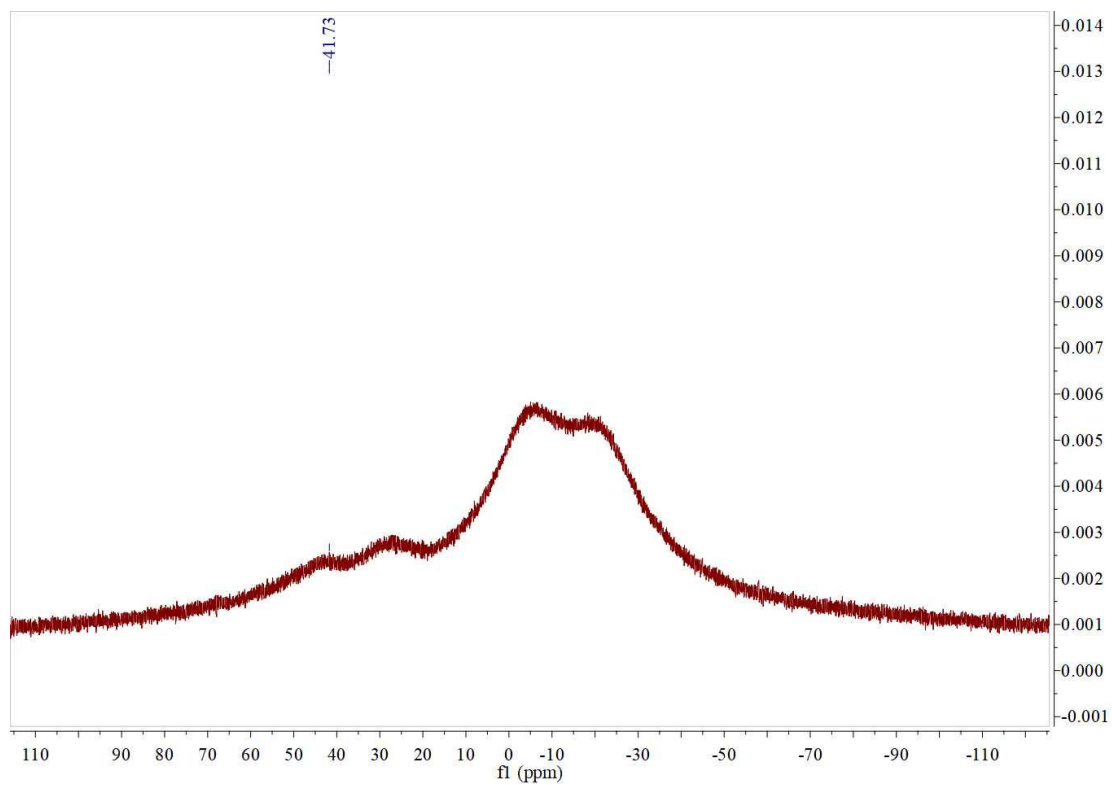

**Fig. S69**  $^{11}\text{B}$  NMR Spectra of **11** (128 MHz,  $\text{CDCl}_3$ )

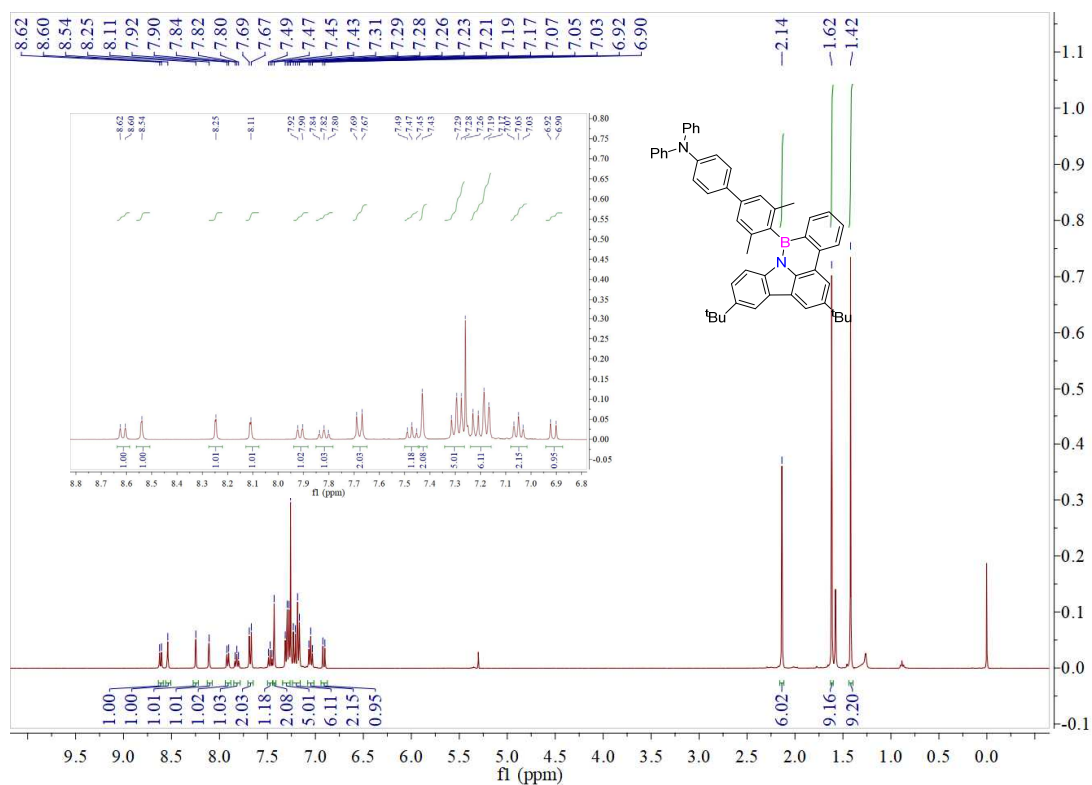

**Fig. S70**  $^1\text{H}$  NMR Spectra of **12** (400 MHz,  $\text{CDCl}_3$ )

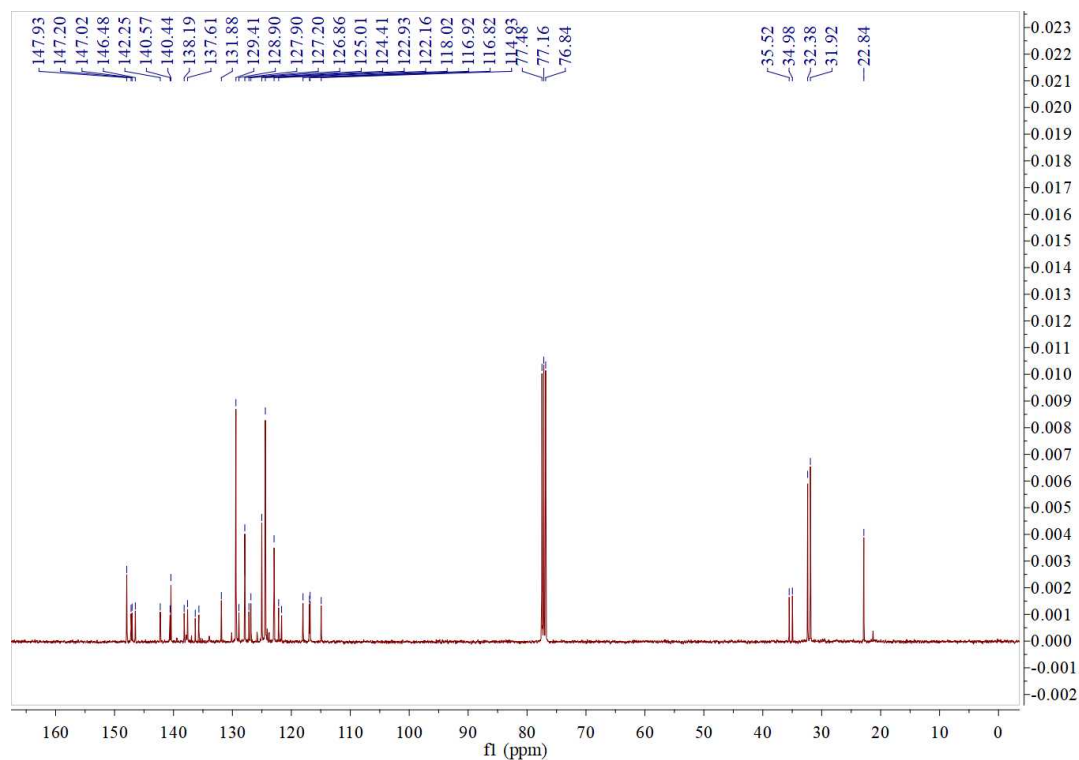

**Fig. S71**  $^{13}\text{C}$  NMR Spectra of **12** (100 MHz,  $\text{CDCl}_3$ )

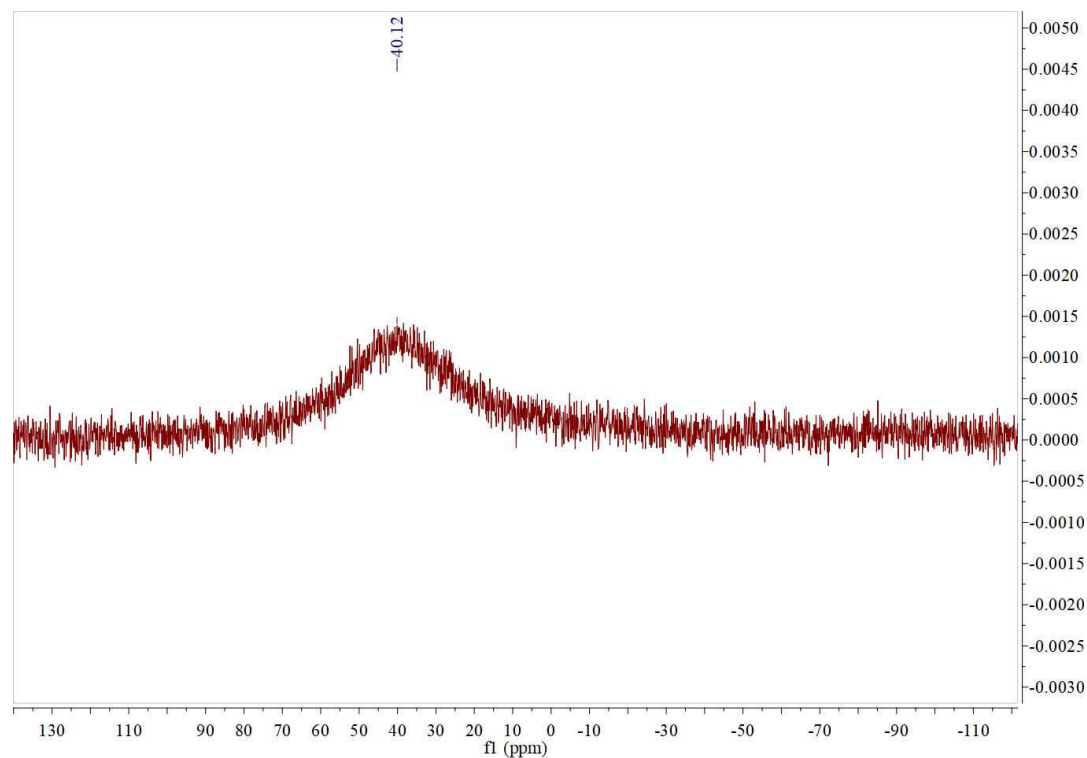

**Fig. S72**  $^{11}\text{B}$  NMR Spectra of **12** (128 MHz,  $\text{CDCl}_3$ , in quartz NMR tube)



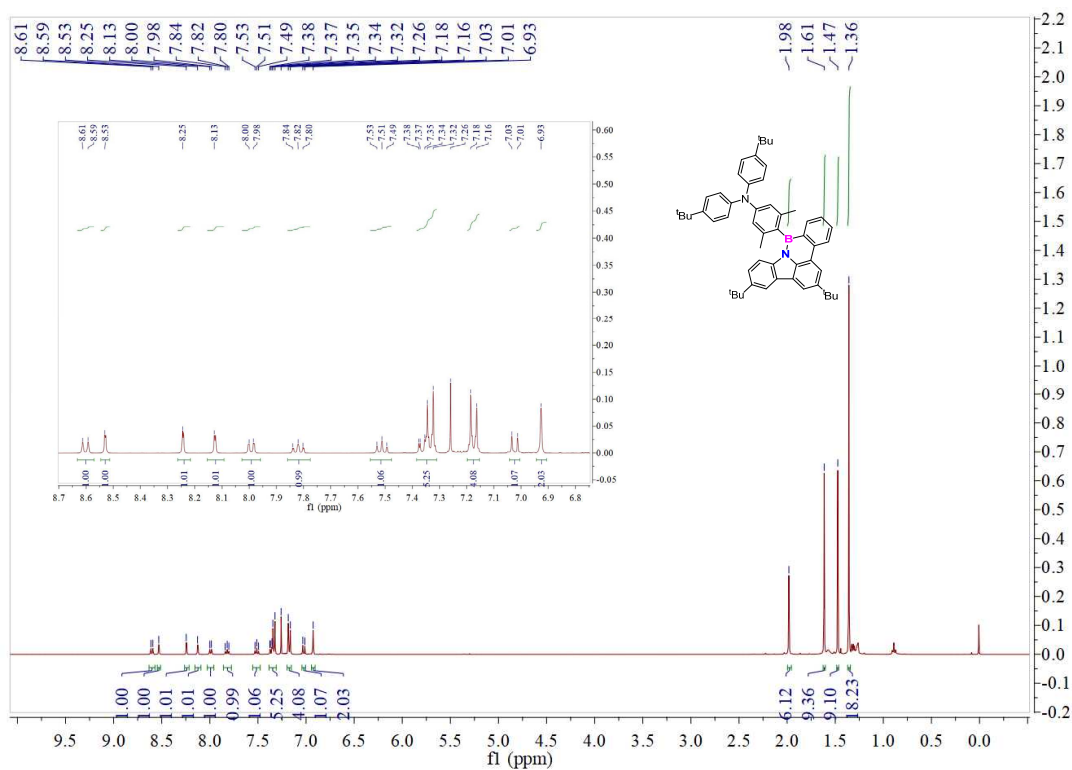

**Fig. S73** <sup>1</sup>H NMR Spectra of **13** (400 MHz, CDCl<sub>3</sub>)

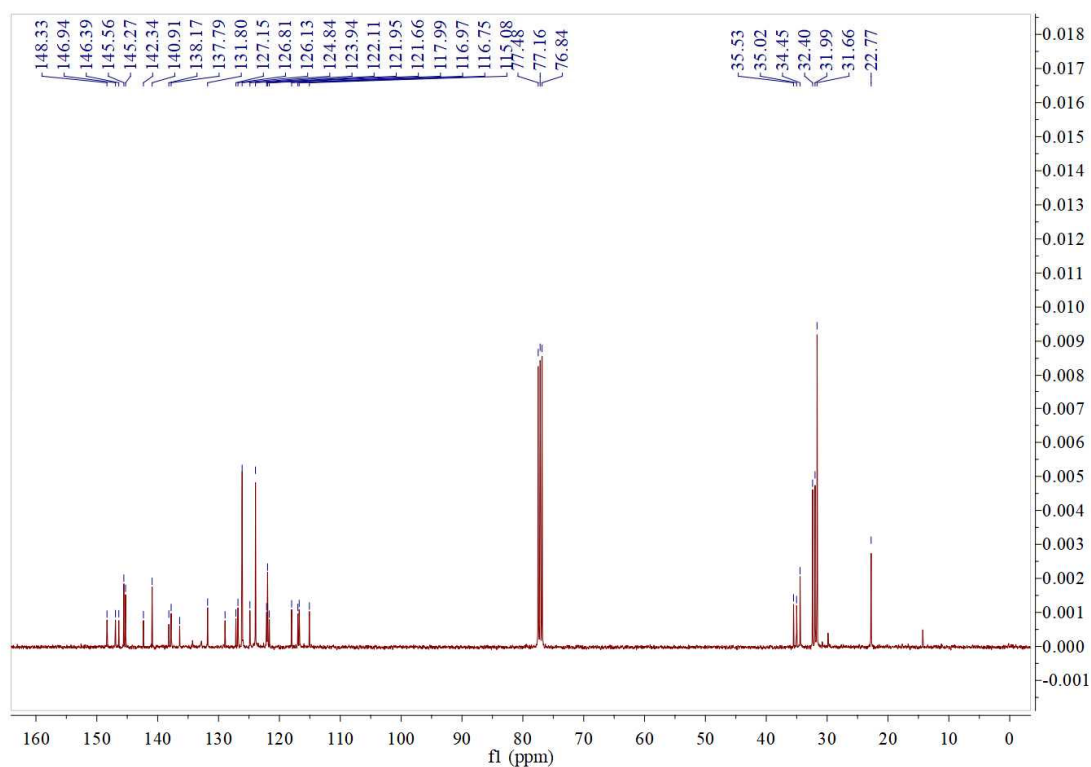

**Fig. S74** <sup>13</sup>C NMR Spectra of **13** (100 MHz, CDCl<sub>3</sub>)

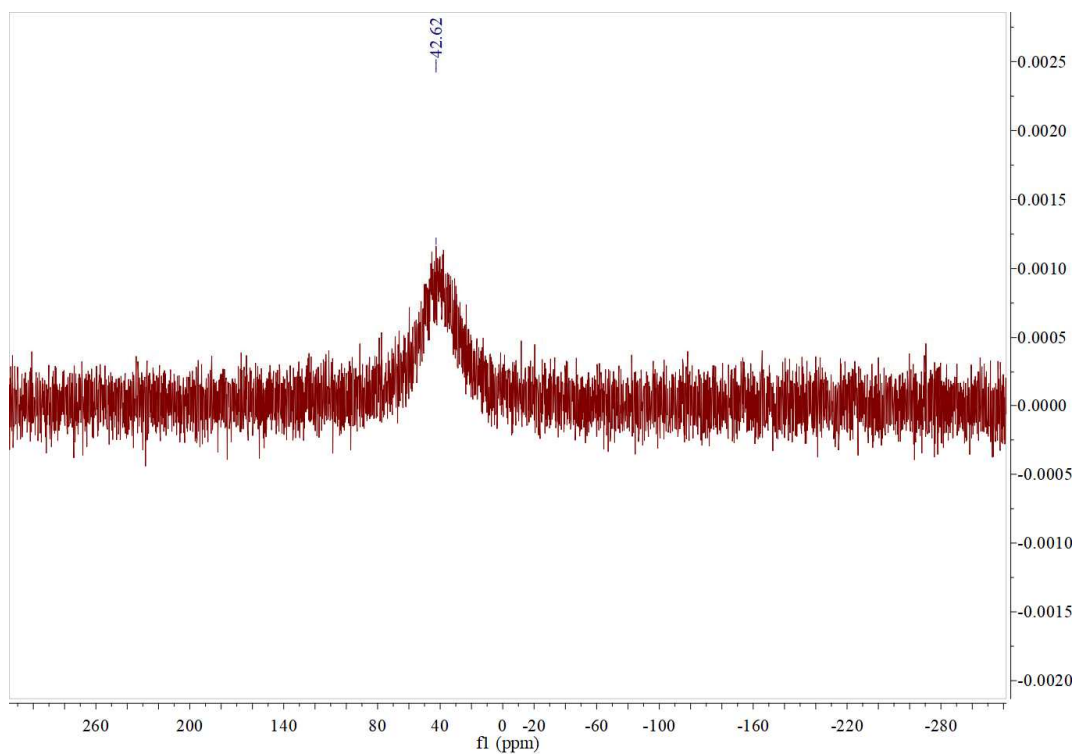

**Fig. S75**  $^{11}\text{B}$  NMR Spectra of **13** (128 MHz,  $\text{CDCl}_3$ , in quartz NMR tube)
